# Supplementary material for: Construction of an all-carbon quaternary stereocenter by organocatalytic enantioselective α-functionalization of α-substituted β-ketocarbonyls with electron deficient vinylarenes
Source: Royal Society of Chemistry journal article supplement (doi:10.1039/c5cc03562g), 2015-01-01
Supplement: c5cc03562g1.pdf [file c5cc03562g1.pdf]

**Construction of All Carbon Quaternary Stereocenter by  
Organocatalytic Enantioselective  $\alpha$ -Functionalization of  
 $\alpha$ -Substituted  $\beta$ -Ketocarboxyls with Electron Deficient Vinylarenes**

*Shizhou Liu,<sup>a</sup> Mengchao Tong,<sup>a</sup> Yang Yu,<sup>a</sup> Hexin Xie,<sup>a</sup> Hao Li<sup>\*a</sup> and Wei Wang<sup>\*a,b</sup>*

<sup>a</sup> Shanghai Key Laboratory of New Drug Design, School of Pharmacy, and State Key Laboratory of Bioengineering Reactor, East China University of Science and Technology, 130 Mei-long Road, Shanghai, 200237, China

<sup>b</sup> Department of Chemistry and Chemical Biology, University of New Mexico, Albuquerque, NM 87131-0001, USA

**Supporting Information**

**Table of contents**

|                                                                   |            |
|-------------------------------------------------------------------|------------|
| <b>I. General Information .....</b>                               | <b>S2</b>  |
| <b>II. Procedure for the synthesis of catalysts .....</b>         | <b>S3</b>  |
| <b>III. Procedure for the synthesis of compound 2.....</b>        | <b>S3</b>  |
| <b>IV. General procedure for the synthesis of compound 3.....</b> | <b>S3</b>  |
| <b>V. The synthesis of compound 5 .....</b>                       | <b>S8</b>  |
| <b>VI. Determination of X-ray crystallographic structure.....</b> | <b>S9</b>  |
| <b>VII. References .....</b>                                      | <b>S30</b> |
| <b>VIII. <sup>1</sup>H and <sup>13</sup>C-NMR spectra .....</b>   | <b>S31</b> |
| <b>IX. Chiral HPLC analysis spectra .....</b>                     | <b>S45</b> |

## 1. General Information

Unless otherwise noted, all reagents were obtained commercially and used without further purification. Unless otherwise specified, all other reagents were purchased from Acros, Aldrich, Fisher, Adamas-beta Co. Ltd. or TCI and used without further purification.  $^1\text{H}$  NMR spectra was recorded at 400 MHz,  $^{13}\text{C}$  NMR spectra was recorded at 100 MHz.  $^1\text{H}$  NMR spectra was recorded with tetramethylsilane ( $\delta = 0.00$  ppm) as internal reference;  $^{13}\text{C}$  NMR spectra was recorded with  $\text{CDCl}_3$  ( $\delta = 77.00$  ppm) as internal reference. Chemical shifts were reported in parts per million (ppm,  $\delta$ ) downfield from tetramethylsilane. Proton coupling patterns are described as singlet (s), doublet (d), triplet (t), quartet (q), multiplet (m), and broad (br). Chromatography was carried out with silica gel (200-300 mesh) using mixtures of petroleum ether (b.p. 60-80 °C) and ethyl acetate as eluents. The enantiomeric excess of products was detected on HPLC (Shimadzu LC-LabSolutions). Mass Spectra were obtained from East China University of Science and Technology mass spectral facility. Melting point (mp) was recorded on X4 microscopic instrument.

## 2. Procedure for the synthesis of catalysts

Optically pure amine **IV** is commercially available. Amines **I**<sup>1</sup>, **II**<sup>1</sup>, **III**<sup>2</sup>, **V**<sup>3</sup> and **VI**<sup>4</sup> are known in the literature and were prepared according to the literature methods.

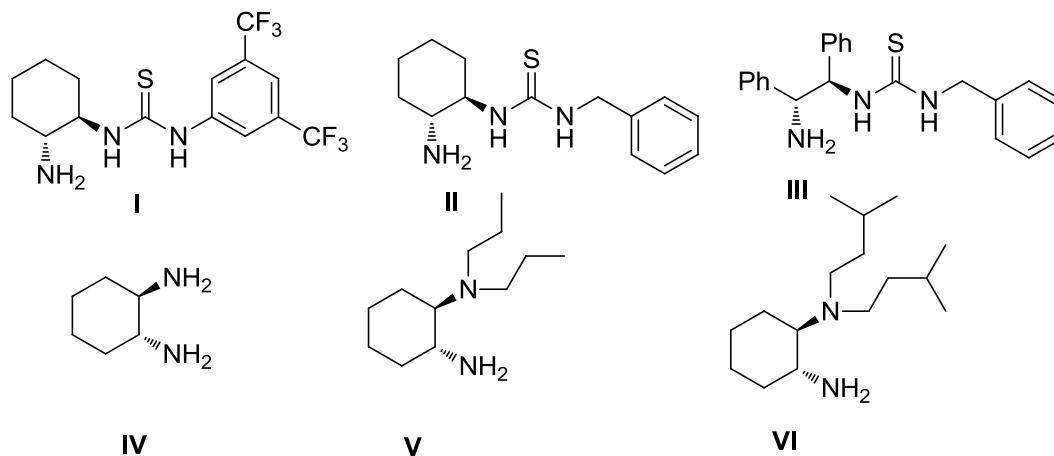

## 3. Procedure for the synthesis of compound 2

Compound **2** were prepared according to the literature methods.<sup>5</sup>

## 4. General procedure for the synthesis of compound 3

To a solution of vinylarenes (0.2 mmol) and ketones (1.5 mmol) in dioxane (600  $\mu$ L) was added the catalyst (0.06 mmol) and benzoic acid (0.06 mmol). The resulting solution was stirred at 23 °C or 50 °C for a defined time (2-15 d). The crude reaction mixture was directly purified by column chromatography (petroleum ether/ethyl acetate 8/1 v/v) on silica gel to give the corresponding product.

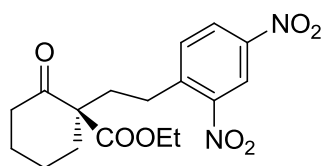

**(R)-Ethyl 1-(2,4-dinitrophenethyl)-2-oxocyclohexanecarboxylate (3a):** The title compound was prepared according to the general procedure, as described above in 80% yield as white solid; mp 60-62 °C. <sup>1</sup>HNMR (CDCl<sub>3</sub>, 400 MHz):  $\delta$  8.77 (s, 1H), 8.38 (d,  $J$  = 8.0 Hz, 1H), 7.70 (d,  $J$  = 8.0 Hz, 1H), 4.29 (q,  $J$  = 7.2 Hz, 2H), 2.86-3.01 (m, 2H), 2.47-2.62 (m, 3H), 2.05-2.19 (m, 2H), 1.91-1.98 (m, 1H), 1.52-1.82 (m, 5H), 1.33 (t,  $J$  = 7.2 Hz, 2H); <sup>13</sup>CNMR (CDCl<sub>3</sub>, 100 MHz):  $\delta$  207.9, 171.5, 148.9, 146.4, 144.2, 133.8, 127.2, 120.3, 61.77, 60.6, 41.1, 36.3, 35.5, 28.5, 27.6, 22.6, 14.2; 146.6, 144.2, 139.6, 137.8, 136.2, 131.5, 127.8, 126.0, 121.0, 114.4, 55.2, 33.4, 32.5; HRMS (ESI)  $m/z$  calcd for C<sub>17</sub>H<sub>20</sub>N<sub>2</sub>O<sub>7</sub> (M+Na)<sup>+</sup> 387.1168, found 387.1169; HPLC (Chiralpak AD-3, *i*-PrOH/hexane = 10/90, flow rate = 1.0 mL/min,  $\lambda$  = 254 nm):  $t_{\text{minor}}$  = 22.27 min,  $t_{\text{major}}$  =

19.17 min, ee = 92%.

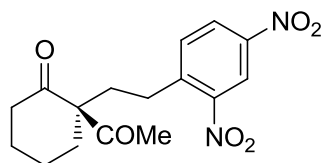

**(R)-2-Acetyl-2-(2,4-dinitrophenethyl)cyclohexanone (3b):** The title compound was prepared according to the general procedure, as described above in 70% yield as yellow oil. <sup>1</sup>HNMR (CDCl<sub>3</sub>, 400 MHz): δ 8.78 (d, *J* = 2.0 Hz, 1H), 8.39 (dd, *J*<sub>1</sub> = 2.0 Hz, *J*<sub>2</sub> = 8.4 Hz, 1H), 7.72 (d, *J* = 8.4 Hz, 1H), 2.74-2.85 (m, 2H), 2.49-2.56 (m, 2H), 2.39-2.49 (m, 1H), 2.23 (s, 3H), 2.12-2.20 (m, 1H), 1.96-2.04 (m, 2H), 1.60-1.85 (m, 4H); <sup>13</sup>CNMR (CDCl<sub>3</sub>, 100 MHz): δ 209.9, 207.1, 148.8, 146.5, 144.1, 134.0, 127.3, 120.4, 67.2, 41.4, 34.9, 34.7, 28.6, 27.1, 26.2, 22.2; HRMS (ESI) *m/z* calcd for C<sub>16</sub>H<sub>18</sub>N<sub>2</sub>O<sub>6</sub> (M+Na)<sup>+</sup> 357.1063, found 357.1066; HPLC (Chiralpak AD-3, *i*-PrOH/hexane = 10/90, flow rate = 1.0 mL/min, λ = 254 nm): *t*<sub>minor</sub> = 29.65 min, *t*<sub>major</sub> = 27.26 min, ee = 80%.

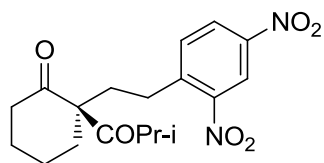

**(R)-2-(2,4-dinitrophenethyl)-2-isobutyrylcyclohexanone (3c):** The title compound was prepared according to the general procedure, as described above in 60% yield as yellow oil. <sup>1</sup>HNMR (CDCl<sub>3</sub>, 400 MHz): δ 8.77 (d, *J* = 2.0 Hz, 1H), 8.39 (dd, *J*<sub>1</sub> = 3.0 Hz, *J*<sub>2</sub> = 8.4 Hz, 1H), 7.75 (d, *J* = 8.4 Hz, 1H), 2.80-2.96 (m, 2H), 2.68-2.75 (m, 1H), 2.50-2.58 (m, 2H), 2.39-2.47 (m, 1H), 2.06-2.20 (m, 2H), 1.93-2.00 (m, 1H), 1.73-1.90 (m, 3H), 1.63-1.69 (m, 1H), 1.17 (s, 3H), 1.07 (s, 3H); <sup>13</sup>CNMR (CDCl<sub>3</sub>, 100 MHz): δ 213.7, 210.3, 148.9, 146.5, 144.2, 134.0, 127.3, 120.3, 67.8, 41.5, 36.8, 34.1, 33.5, 28.5, 26.7, 21.8, 20.9, 20.4; HRMS (ESI) *m/z* calcd for C<sub>18</sub>H<sub>22</sub>N<sub>2</sub>O<sub>6</sub> (M+Na)<sup>+</sup> 385.1376, found 385.1378; HPLC (Chiralpak OD-3, *i*-PrOH/hexane = 5/95, flow rate = 1.0 mL/min, λ = 254 nm): *t*<sub>minor</sub> = 31.32 min, *t*<sub>major</sub> = 36.39 min, ee = 91%.

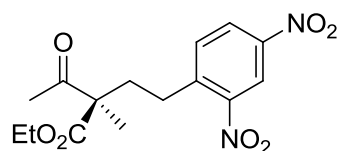

**(R)-Ethyl 2-acetyl-4-(2,4-dinitrophenyl)-2-methylbutanoate (3d):** The title compound was prepared according to the general procedure, as described above in 77% yield as yellow oil. <sup>1</sup>HNMR (CDCl<sub>3</sub>, 400 MHz): δ 8.78 (s, 1H), 8.39 (d, *J* = 8 Hz, 1H), 7.65 (d, *J* = 8 Hz, 1H), 4.27 (q, *J* = 8 Hz, 2H), 2.84-2.98 (m, 2H), 2.06-2.22 (m, 5H), 1.49 (s, 3H), 1.31 (t, *J* = 7.2 Hz, 3H);

$^{13}\text{C}$ NMR ( $\text{CDCl}_3$ , 100 MHz):  $\delta$  204.9, 172.2, 148.9, 146.5, 143.8, 133.7, 127.2, 120.4, 61.8, 59.3, 35.6, 28.5, 26.1, 19.0, 14.0; HRMS (ESI)  $m/z$  calcd for  $\text{C}_{15}\text{H}_{18}\text{N}_2\text{O}_7$  ( $\text{M}+\text{Na}$ ) $^+$  361.1012, found 361.1008; HPLC (Chiralpak AD-3, *i*-PrOH/hexane = 5/95, flow rate = 1.0 mL/min,  $\lambda$  = 254 nm):  $t_{\text{minor}}$  = 26.33 min,  $t_{\text{major}}$  = 24.12 min, ee = 86%.

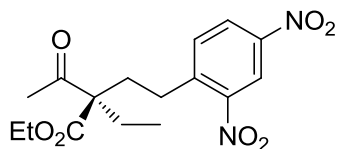

**(R)-Ethyl 2-acetyl-4-(2,4-dinitrophenyl)-2-ethylbutanoate (3e):** The title compound was prepared according to the general procedure, as described above in 65% yield as yellow oil.  $^1\text{H}$ NMR ( $\text{CDCl}_3$ , 400 MHz):  $\delta$  8.78 (d,  $J$  = 2.4 Hz, 1H), 8.38 (dd,  $J_1$  = 2.4 Hz,  $J_2$  = 8.4 Hz, 1H), 7.61 (d,  $J$  = 8.4 Hz, 1H), 4.24-4.31 (m, 2H), 2.74-2.87 (m, 2H), 2.13-2.21 (m, 5H), 1.98-2.01 (m, 2H), 1.32 (t,  $J$  = 7.2 Hz, 3H), 0.86 (t,  $J$  = 7.6 Hz, 3H);  $^{13}\text{C}$ NMR ( $\text{CDCl}_3$ , 100 MHz):  $\delta$  204.7, 171.8, 148.9, 146.5, 143.8, 133.6, 127.2, 120.4, 63.6, 61.7, 31.7, 28.3, 26.7, 24.7, 14.1, 8.2; HRMS (ESI)  $m/z$  calcd for  $\text{C}_{16}\text{H}_{20}\text{N}_2\text{O}_7$  ( $\text{M}+\text{Na}$ ) $^+$  375.1168, found 375.1167; HPLC (Chiralpak AD-3, *i*-PrOH/hexane = 10/90, flow rate = 1.0 mL/min,  $\lambda$  = 254 nm):  $t_{\text{minor}}$  = 14.10 min,  $t_{\text{major}}$  = 13.11 min, ee = 82%.

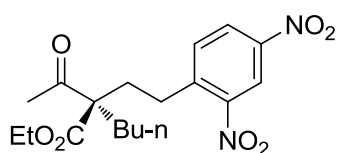

**(R)-Ethyl 2-acetyl-2-(2,4-dinitrophenethyl)hexanoate (3f):** The title compound was prepared according to the general procedure, as described above in 61% yield as yellow oil.  $^1\text{H}$ NMR ( $\text{CDCl}_3$ , 400 MHz):  $\delta$  8.78 (d,  $J$  = 2.4 Hz, 1H), 8.38 (dd,  $J_1$  = 2.4 Hz,  $J_2$  = 8.4 Hz, 1H), 7.61 (d,  $J$  = 8.4 Hz, 1H), 4.23-4.31 (m, 2H), 2.75-2.88 (m, 2H), 2.11-2.23 (m, 5H), 1.90-2.04 (m, 2H), 1.28-1.40 (m, 5H), 1.16-1.22 (m, 1H), 1.08-1.12 (m, 1H), 0.93 (t,  $J$  = 7.2 Hz, 3H);  $^{13}\text{C}$ NMR ( $\text{CDCl}_3$ , 100 MHz):  $\delta$  204.8, 171.9, 48.9, 146.5, 143.8, 133.6, 127.2, 120.4, 63.2, 61.7, 32.2, 31.5, 28.4, 26.7, 25.9, 23.0, 14.1, 13.8; HRMS (ESI)  $m/z$  calcd for  $\text{C}_{18}\text{H}_{24}\text{N}_2\text{O}_7$  ( $\text{M}+\text{Na}$ ) $^+$  403.1481, found 403.1473; HPLC (Chiralpak IC-3, *i*-PrOH/hexane = 5/95, flow rate = 1.0 mL/min,  $\lambda$  = 254 nm):  $t_{\text{minor}}$  = 123.64 min,  $t_{\text{major}}$  = 84.02 min, ee = 88%.

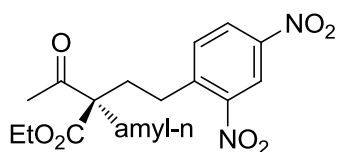

**(R)-Ethyl 2-acetyl-2-(2,4-dinitrophenethyl)heptanoate (3g):** The title compound was prepared according to the general procedure, as described above in 69% yield as yellow oil.  $^1\text{H}$ NMR

(CDCl<sub>3</sub>, 400 MHz):  $\delta$  8.78 (d,  $J$  = 2.4 Hz, 1H), 8.38 (dd,  $J_1$  = 2.4 Hz,  $J_2$  = 8.4 Hz, 1H), 7.61 (d,  $J$  = 8.4 Hz, 1H), 4.23-4.34 (m, 2H), 2.74-2.87 (m, 2H), 2.08-2.24 (m, 5H), 1.89-2.00 (m, 2H), 1.27-1.34 (m, 7H), 1.15-1.25 (m, 1H), 1.05-1.15 (m, 1H), 0.89 (t,  $J$  = 8.4 Hz, 3H); <sup>13</sup>CNMR (CDCl<sub>3</sub>, 100 MHz):  $\delta$  204.9, 171.9, 148.9, 146.5, 143.9, 33.6, 127.2, 120.4, 63.3, 61.7, 32.3, 32.0, 31.8, 28.4, 26.7, 23.4, 22.3, 14.1, 13.9; HRMS (ESI)  $m/z$  calcd for C<sub>19</sub>H<sub>26</sub>N<sub>2</sub>O<sub>7</sub> (M+Na)<sup>+</sup> 417.1638, found 417.1642; HPLC (Chiralpak IC-3, *i*-PrOH/hexane = 10/90, flow rate = 1.0 mL/min,  $\lambda$  = 254 nm):  $t_{\text{minor}}$  = 81.27 min,  $t_{\text{major}}$  = 51.28 min, ee = 88%.

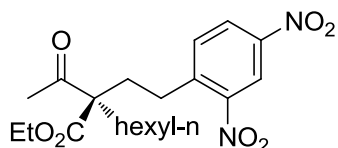

**(R)-Ethyl 2-acetyl-2-(2,4-dinitrophenethyl)octanoate (3h):** The title compound was prepared according to the general procedure, as described above in 67% yield as yellow oil. <sup>1</sup>HNMR (CDCl<sub>3</sub>, 400 MHz):  $\delta$  8.78 (d,  $J$  = 2.4 Hz, 1H), 8.38 (dd,  $J_1$  = 2.4 Hz,  $J_2$  = 8.4 Hz, 1H), 7.61 (d,  $J$  = 8.4 Hz, 1H), 4.23-4.31 (m, 2H), 2.75-2.88 (m, 2H), 2.09-2.23 (m, 5H), 1.89-2.05 (m, 2H), 1.25-1.36 (m, 9H), 1.15-1.24 (m, 1H), 1.04-1.15 (m, 1H), 0.89 (t,  $J$  = 6.8 Hz, 3H); <sup>13</sup>CNMR (CDCl<sub>3</sub>, 100 MHz):  $\delta$  204.9, 171.9, 148.9, 146.5, 143.9, 133.6, 127.2, 120.4, 63.2, 61.7, 32.2, 31.8, 31.5, 29.6, 28.4, 26.7, 23.7, 22.5, 14.1, 14.0; HRMS (ESI)  $m/z$  calcd for C<sub>20</sub>H<sub>28</sub>N<sub>2</sub>O<sub>7</sub> (M+Na)<sup>+</sup> 431.1794, found 431.1794; HPLC (Chiralpak IC-3, *i*-PrOH/hexane = 10/90, flow rate = 1.0 mL/min,  $\lambda$  = 254 nm):  $t_{\text{minor}}$  = 96.36 min,  $t_{\text{major}}$  = 48.75 min, ee = 89%.

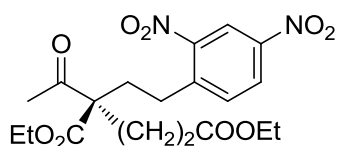

**(R)-Diethyl 2-acetyl-2-(2,4-dinitrophenethyl)pentanedioate (3i):** The title compound was prepared according to the general procedure, as described above in 83% yield as yellow oil. <sup>1</sup>HNMR (CDCl<sub>3</sub>, 400 MHz):  $\delta$  8.80 (d,  $J$  = 2.4 Hz, 1H), 8.39 (dd,  $J_1$  = 2.4 Hz,  $J_2$  = 8.4 Hz, 1H), 7.64 (d,  $J$  = 8.4 Hz, 1H), 4.28 (q,  $J$  = 7.2 Hz, 2H), 4.15 ( $J$  = 7.2 Hz, 2H), 2.78-2.91 (m, 1H), 2.14-2.40 (m, 9H), 1.33 (t,  $J$  = 7.2 Hz, 3H), 1.27 (t,  $J$  = 7.2 Hz, 3H); <sup>13</sup>CNMR (CDCl<sub>3</sub>, 100 MHz):  $\delta$  204.2, 172.5, 171.3, 148.9, 146.6, 143.5, 133.8, 127.3, 120.5, 62.5, 62.0, 60.9, 32.4, 28.9, 28.3, 26.8, 26.5, 14.2, 14.1; HRMS (ESI)  $m/z$  calcd for C<sub>19</sub>H<sub>24</sub>N<sub>2</sub>O<sub>9</sub> (M+Na)<sup>+</sup> 447.1380, found 447.1383; HPLC (Chiralpak AD-3, *i*-PrOH/hexane = 10/90, flow rate = 1.0 mL/min,  $\lambda$  = 254 nm):  $t_{\text{minor}}$  = 34.16 min,  $t_{\text{major}}$  = 44.72 min, ee = 81%.

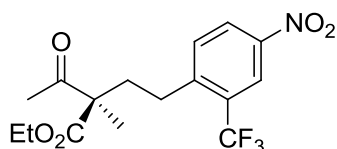

**(R)-Ethyl 2-acetyl-2-methyl-4-(4-nitro-2-(trifluoromethyl)phenyl)butanoate (3j):** The title compound was prepared according to the general procedure, as described above in 83% yield as yellow oil.  $^1\text{H}$ NMR ( $\text{CDCl}_3$ , 400 MHz):  $\delta$  8.50 (d,  $J = 2.4$  Hz, 1H), 8.34 (dd,  $J_1 = 2.4$  Hz,  $J_2 = 8.4$  Hz, 1H), 7.61 (d,  $J = 2.4$  Hz, 1H), 4.22-4.29 (m, 2H), 2.74-2.86 (m, 2H), 2.13-2.20 (m, 3H), 1.97-2.04 (m, 1H), 1.47 (s, 3H), 1.31 (t,  $J = 7.2$  Hz, 3H);  $^{13}\text{C}$ NMR ( $\text{CDCl}_3$ , 100 MHz):  $\delta$  204.9, 172.3, 148.2, 146.1, 132.9, 130.3, 129.9, 129.7, 129.3, 126.6, 124.6, 121.8, 121.8, 121.7, 121.7, 121.6, 61.7, 59.4, 36.7, 27.9, 26.1, 19.1, 14.1; HRMS (ESI)  $m/z$  calcd for  $\text{C}_{16}\text{H}_{18}\text{F}_3\text{NO}_5$  ( $\text{M}+\text{Na}$ ) $^+$  384.1035, found 384.1033; HPLC (Chiralpak AD-3, *i*-PrOH/hexane = 10/90, flow rate = 1.0 mL/min,  $\lambda = 254$  nm):  $t_{\text{minor}} = 7.37$  min,  $t_{\text{major}} = 7.93$  min, ee = 81%.

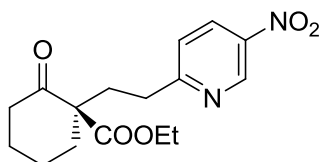

**(R)-Ethyl 1-(2-(5-nitropyridin-2-yl)ethyl)-2-oxocyclohexanecarboxylate (3k):** The title compound was prepared according to the general procedure, as described above in 63% yield as yellow oil.  $^1\text{H}$ NMR ( $\text{CDCl}_3$ , 400 MHz):  $\delta$  9.34 (s, 1H), 8.38 (d,  $J = 8.0$  Hz, 1H), 7.40 (d,  $J = 8.0$  Hz, 1H), 4.18-4.29 (m, 2H), 2.95-3.02 (m, 1H), 2.78-2.85 (m, 1H), 2.46-2.59 (m, 3H), 2.23-2.30 (m, 1H), 2.03-2.09 (m, 2H), 1.52-1.91 (m, 4H), 1.28-1.32 (m, 3H);  $^{13}\text{C}$ NMR ( $\text{CDCl}_3$ , 100 MHz):  $\delta$  207.8, 171.8, 168.4, 144.7, 142.7, 131.4, 123.1, 61.5, 60.5, 41.1, 36.5, 34.2, 33.5, 27.6, 22.6, 14.2; HRMS (ESI)  $m/z$  calcd for  $\text{C}_{16}\text{H}_{20}\text{N}_2\text{O}_5$  ( $\text{M}+\text{Na}$ ) $^+$  342.1270, found 342.1265; HPLC (Chiralpak AD-3, *i*-PrOH/hexane = 10/90, flow rate = 1.0 mL/min,  $\lambda = 254$  nm):  $t_{\text{minor}} = 31.20$  min,  $t_{\text{major}} = 21.87$  min, ee = 95%.

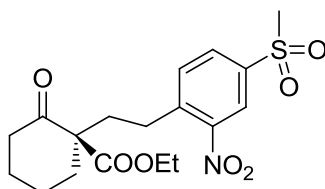

**(R)-Ethyl 1-(4-(methylsulfonyl)-2-nitrophenethyl)-2-oxocyclohexanecarboxylate (3l):** The title compound was prepared according to the general procedure. The crude reaction mixture was directly purified by column chromatography (petroleum ether/ethyl acetate 2/1 v/v) on silica gel to give the corresponding product in 72% yield as white solid; mp 59-60 °C.  $^1\text{H}$ NMR ( $\text{CDCl}_3$ , 400 MHz):  $\delta$  8.45 (d,  $J = 1.6$  Hz, 1H), 8.08 (dd,  $J_1 = 2.0$  Hz,  $J_2 = 8.0$  Hz, 1H), 7.71 (d,  $J = 8.0$  Hz, 1H),

4.29 (q,  $J = 7.2$  Hz, 2H), 3.11 (s, 3H), 2.84-3.00 (m, 2H), 2.46-2.62 (m, 3H), 2.11-2.19 (m, 1H), 2.03-2.11 (m, 1H), 1.90-1.98 (m, 1H), 1.77-1.87 (m, 1H), 1.63-1.76 (m, 2H), 1.50-1.58 (m, 1H), 1.33 (t,  $J = 7.2$  Hz, 3H);  $^{13}\text{C}$ NMR ( $\text{CDCl}_3$ , 100 MHz):  $\delta$  207.8, 171.5, 149.2, 143.2, 140.1, 133.9, 131.2, 124.2, 61.7, 60.6, 44.4, 41.1, 36.3, 35.6, 28.4, 27.6, 22.5, 14.1; HRMS (ESI)  $m/z$  calcd for  $\text{C}_{18}\text{H}_{23}\text{NO}_7\text{S}$  ( $\text{M}+\text{Na}$ ) $^+$  420.1093, found 420.1094; HPLC (Chiralpak AD-3, *i*-PrOH/hexane = 25/75, flow rate = 1.0 mL/min,  $\lambda = 254$  nm):  $t_{\text{minor}} = 16.93$  min,  $t_{\text{major}} = 14.39$  min, ee = 93%.

## 5. The synthesis of compound 5

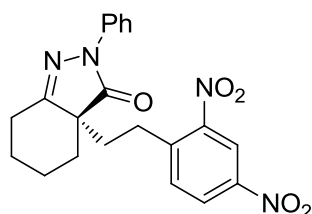

### (*R*)-3a-(2,4-Dinitrophenethyl)-2-phenyl-4,5,6,7-tetrahydro-2H-indazol-3(3aH)-one (**5a**):

Phenylhydrazine (**4**, 88 mg, 0.82 mmol) and AcOH (59 mg, 0.98 mmol) were added to a solution of **3a** (300 mg, 0.82 mmol) in EtOH (2 mL) and the reaction mixture was stirred for 4 h at 23 °C. The precipitated solid was filtered off and dried as a yellow solid (260.6 mg). TFA (98.2 mg, 0.86 mmol) was added to a solution of the yellow solid (260.6 mg) in  $\text{CH}_2\text{Cl}_2$  (5 mL) and the solution was stirred overnight h at 23°C. After removal of all volatile materials in vacuo, the residue was purified by using chromatography (petroleum ether/ethyl acetate 4/1 v/v), to yield **5a** (166 mg, 0.41 mmol, 71 %) as a white solid; mp 127-128 °C.  $^1\text{H}$ NMR ( $\text{CDCl}_3$ , 400 MHz):  $\delta$  8.79 (d,  $J = 2.0$  Hz, 1H), 8.30 (dd,  $J_1 = 3.0$  Hz,  $J_2 = 7.2$  Hz, 1H), 7.94 (d,  $J = 8.0$  Hz, 2H), 7.53 (d,  $J = 8.4$  Hz, 1H), 7.42 (t,  $J = 8.4$  Hz, 2H), 7.20 (t,  $J = 7.2$  Hz, 1H), 2.93-3.00 (m, 1H), 2.78-2.83 (m, 1H), 2.53-2.69 (m, 3H), 2.35-2.43 (m, 1H), 2.09-2.24 (m, 3H), 1.49-1.81 (m, 4H);  $^{13}\text{C}$ NMR ( $\text{CDCl}_3$ , 100 MHz):  $\delta$  176.0, 166.5, 148.8, 146.7, 142.7, 138.0, 134.1, 128.9, 127.3, 125.2, 120.5, 118.6, 54.8, 35.4, 33.1, 28.8, 28.8, 27.2, 20.8; HRMS (ESI)  $m/z$  calcd for  $\text{C}_{21}\text{H}_{20}\text{N}_4\text{O}_5$  ( $\text{M}+\text{Na}$ ) $^+$  431.1331, found 431.1323; HPLC (Chiralpak AD-3, *i*-PrOH/hexane = 10/90, flow rate = 1.0 mL/min,  $\lambda = 254$  nm):  $t_{\text{minor}} = 30.84$  min,  $t_{\text{major}} = 45.10$  , ee = 95%.

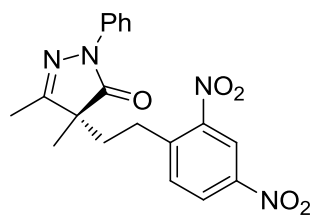

### (*R*)-4-(2,4-Dinitrophenethyl)-3,4-dimethyl-1-phenyl-1H-pyrazol-5(4H)-one (**5d**):

Phenylhydrazine (**4**, 142 mg, 1.34 mmol) was added to a solution of **3d** (300 mg, 0.89 mmol) in



AcOH (2 mL) and the reaction mixture was refluxed for 1 h. After removal of AcOH in vacuo, the residue was purified by using chromatography (petroleum ether/ethyl acetate 4/1 v/v), to yield **5d** (305 mg, 0.80 mmol, 90 %) as a light yellow liquid.  $^1\text{H}$ NMR ( $\text{CDCl}_3$ , 400 MHz):  $\delta$  8.78 (d,  $J = 2.4$  Hz, 1H), 8.30 (dd,  $J_1 = 2.4$  Hz,  $J_2 = 8.4$  Hz, 1H), 7.92 (d,  $J = 8.4$  Hz, 2H), 7.53 (d,  $J = 8.4$  Hz, 1H), 7.41 (t,  $J = 8.4$  Hz, 2H), 7.20 (t,  $J = 7.2$  Hz, 1H), 2.93-3.00 (m, 1H), 2.54-2.61 (m, 1H), 2.25 (s, 3H), 2.10-2.15 (m, 2H), 1.38 (s, 3H);  $^{13}\text{C}$ NMR ( $\text{CDCl}_3$ , 100 MHz):  $\delta$  175.3, 163.4, 148.7, 146.6, 142.5, 137.8, 134.0, 128.9, 127.4, 125.2, 120.5, 118.6, 54.4, 35.9, 29.1, 20.73, 13.61; HRMS (ESI)  $m/z$  calcd for  $\text{C}_{19}\text{H}_{18}\text{N}_4\text{O}_5$  ( $\text{M}+\text{Na}$ ) $^+$  405.1175, found 405.1181; HPLC (Chiralpak AD-3, *i*-PrOH/hexane = 10/90, flow rate = 1.0 mL/min,  $\lambda = 254$  nm):  $t_{\text{minor}} = 22.22$  min,  $t_{\text{major}} = 25.96$  min, ee = 90%.

## 6. Determination of X-ray crystallographic structure

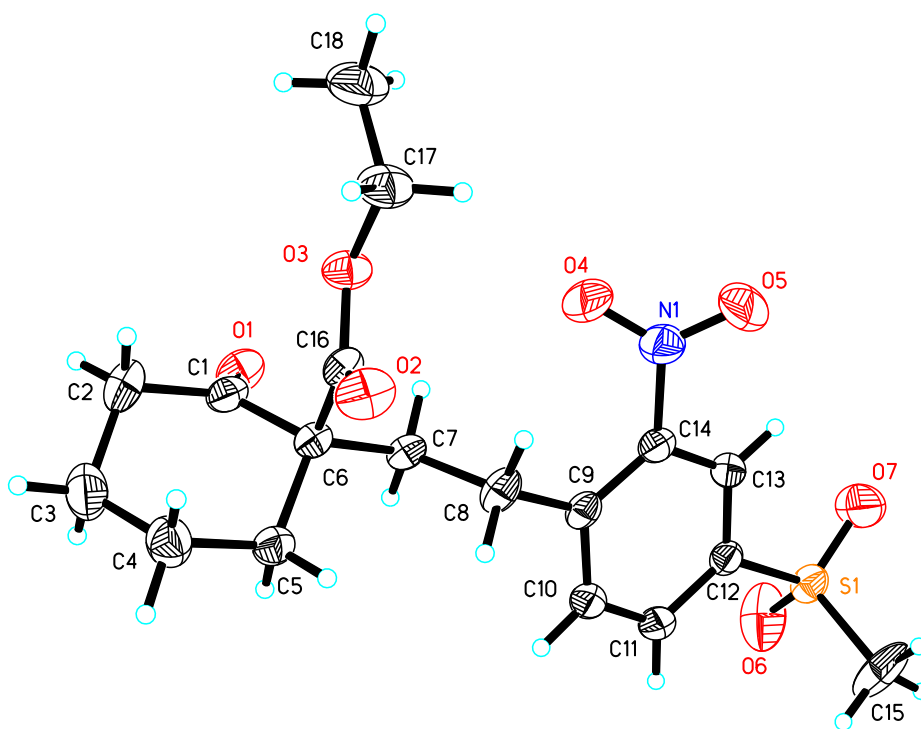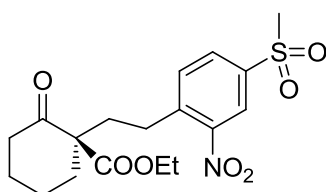

**Fig S1.** The X-ray crystallographic structure of compound **3l**.

Table 1. Crystal data and structure refinement for cd214673.

|                                   |                                             |                             |
|-----------------------------------|---------------------------------------------|-----------------------------|
| Identification code               | cd214673                                    |                             |
| Empirical formula                 | C18 H23 N O7 S                              |                             |
| Formula weight                    | 397.43                                      |                             |
| Temperature                       | 293(2) K                                    |                             |
| Wavelength                        | 0.71073 Å                                   |                             |
| Crystal system                    | Monoclinic                                  |                             |
| Space group                       | P 21                                        |                             |
| Unit cell dimensions              | a = 9.5125(13) Å                            | $\alpha = 90^\circ$ .       |
|                                   | b = 13.887(2) Å                             | $\beta = 90.249(3)^\circ$ . |
|                                   | c = 14.680(2) Å                             | $\gamma = 90^\circ$ .       |
| Volume                            | 1939.2(5) Å <sup>3</sup>                    |                             |
| Z                                 | 4                                           |                             |
| Density (calculated)              | 1.361 Mg/m <sup>3</sup>                     |                             |
| Absorption coefficient            | 0.206 mm <sup>-1</sup>                      |                             |
| F(000)                            | 840                                         |                             |
| Crystal size                      | 0.211 x 0.176 x 0.145 mm <sup>3</sup>       |                             |
| Theta range for data collection   | 1.387 to 25.993°.                           |                             |
| Index ranges                      | -9<=h<=11, -17<=k<=17, -18<=l<=17           |                             |
| Reflections collected             | 11823                                       |                             |
| Independent reflections           | 7463 [R(int) = 0.0224]                      |                             |
| Completeness to theta = 25.242°   | 100.0 %                                     |                             |
| Absorption correction             | Semi-empirical from equivalents             |                             |
| Max. and min. transmission        | 0.7457 and 0.6380                           |                             |
| Refinement method                 | Full-matrix least-squares on F <sup>2</sup> |                             |
| Data / restraints / parameters    | 7463 / 5 / 516                              |                             |
| Goodness-of-fit on F <sup>2</sup> | 1.031                                       |                             |
| Final R indices [I>2sigma(I)]     | R1 = 0.0444, wR2 = 0.1167                   |                             |
| R indices (all data)              | R1 = 0.0523, wR2 = 0.1232                   |                             |
| Absolute structure parameter      | -0.01(4)                                    |                             |
| Extinction coefficient            | n/a                                         |                             |
| Largest diff. peak and hole       | 0.248 and -0.149 e.Å <sup>-3</sup>          |                             |

Table 2. Atomic coordinates ( $\times 10^4$ ) and equivalent isotropic displacement parameters ( $\text{\AA}^2 \times 10^3$ )

for cd214673.  $U(\text{eq})$  is defined as one third of the trace of the orthogonalized  $U^{ij}$  tensor.

|       | x        | y       | z       | $U(\text{eq})$ |
|-------|----------|---------|---------|----------------|
| S(1)  | 3872(1)  | 1802(1) | 4061(1) | 53(1)          |
| S(2)  | 3762(1)  | 6833(1) | 950(1)  | 51(1)          |
| N(1)  | 8371(4)  | 3235(3) | 2737(3) | 65(1)          |
| N(2)  | 8315(4)  | 8269(3) | 2200(3) | 61(1)          |
| O(1)  | 12278(3) | 128(2)  | 1795(2) | 65(1)          |
| O(2)  | 10847(3) | 2397(2) | -234(2) | 68(1)          |
| O(3)  | 12194(3) | 2349(2) | 1009(2) | 54(1)          |
| O(4)  | 9568(4)  | 3096(3) | 2519(3) | 92(1)          |
| O(5)  | 7965(5)  | 3990(3) | 3042(4) | 106(1)         |
| O(6)  | 3766(5)  | 876(3)  | 4447(3) | 110(2)         |
| O(7)  | 4148(4)  | 2553(4) | 4669(3) | 99(1)          |
| O(9)  | 10857(4) | 7341(3) | 5245(2) | 71(1)          |
| O(10) | 12141(3) | 7346(2) | 3980(2) | 59(1)          |
| O(11) | 9514(3)  | 8132(3) | 2440(3) | 84(1)          |
| O(12) | 7934(4)  | 9007(3) | 1841(4) | 112(2)         |
| O(13) | 4161(4)  | 7451(3) | 227(2)  | 87(1)          |
| O(14) | 3427(4)  | 5868(3) | 735(3)  | 92(1)          |
| O(8)  | 12176(6) | 5179(5) | 3115(4) | 64(1)          |
| O(8') | 9031(8)  | 5221(8) | 5119(7) | 77(2)          |
| C(1)  | 12142(4) | 394(3)  | 1020(3) | 49(1)          |
| C(2)  | 13183(4) | 164(4)  | 285(3)  | 70(1)          |
| C(3)  | 12476(6) | -370(4) | -505(4) | 81(1)          |
| C(4)  | 11227(5) | 208(4)  | -863(3) | 67(1)          |
| C(5)  | 10199(4) | 412(3)  | -103(3) | 52(1)          |
| C(6)  | 10847(3) | 969(3)  | 708(2)  | 42(1)          |
| C(7)  | 9795(3)  | 1085(3) | 1490(2) | 42(1)          |
| C(8)  | 8539(3)  | 1721(3) | 1246(2) | 53(1)          |
| C(9)  | 7432(3)  | 1757(3) | 1980(2) | 42(1)          |
| C(10) | 6376(4)  | 1071(3) | 1968(2) | 49(1)          |
| C(11) | 5304(4)  | 1059(3) | 2589(3) | 49(1)          |
| C(12) | 5236(3)  | 1782(3) | 3242(2) | 43(1)          |
| C(13) | 6238(4)  | 2490(3) | 3273(2) | 45(1)          |

|       |          |         |         |        |
|-------|----------|---------|---------|--------|
| C(14) | 7331(3)  | 2460(3) | 2653(2) | 44(1)  |
| C(15) | 2360(4)  | 2058(6) | 3445(3) | 102(2) |
| C(16) | 11286(3) | 1979(3) | 416(2)  | 45(1)  |
| C(17) | 12614(5) | 3345(3) | 862(4)  | 68(1)  |
| C(18) | 13873(7) | 3539(4) | 1436(4) | 88(2)  |
| C(19) | 10155(4) | 5400(4) | 5048(3) | 54(1)  |
| C(20) | 11218(5) | 5138(4) | 5796(3) | 79(1)  |
| C(21) | 12405(6) | 4552(5) | 5385(4) | 89(2)  |
| C(22) | 13095(5) | 5101(4) | 4605(4) | 77(1)  |
| C(23) | 12027(4) | 5373(3) | 3880(3) | 53(1)  |
| C(24) | 10776(3) | 5963(3) | 4248(2) | 43(1)  |
| C(25) | 9697(3)  | 6116(3) | 3482(2) | 42(1)  |
| C(26) | 8494(3)  | 6805(3) | 3738(2) | 51(1)  |
| C(27) | 7361(3)  | 6828(3) | 3015(2) | 42(1)  |
| C(28) | 6301(4)  | 6147(3) | 3046(2) | 49(1)  |
| C(29) | 5216(3)  | 6127(3) | 2427(2) | 49(1)  |
| C(30) | 5151(3)  | 6824(3) | 1761(2) | 44(1)  |
| C(31) | 6163(3)  | 7529(3) | 1706(2) | 44(1)  |
| C(32) | 7263(3)  | 7511(3) | 2325(2) | 43(1)  |
| C(33) | 2352(4)  | 7369(5) | 1517(3) | 74(1)  |
| C(34) | 11260(3) | 6954(3) | 4569(2) | 47(1)  |
| C(35) | 12618(6) | 8326(4) | 4173(4) | 80(2)  |
| C(36) | 13876(7) | 8528(4) | 3642(4) | 88(2)  |

---

Table 3. Bond lengths [ $\text{\AA}$ ] and angles [ $^\circ$ ] for cd214673.

---

|             |          |
|-------------|----------|
| S(1)-O(7)   | 1.397(4) |
| S(1)-O(6)   | 1.409(4) |
| S(1)-C(15)  | 1.732(4) |
| S(1)-C(12)  | 1.773(3) |
| S(2)-O(14)  | 1.413(4) |
| S(2)-O(13)  | 1.418(4) |
| S(2)-C(33)  | 1.748(4) |
| S(2)-C(30)  | 1.775(3) |
| N(1)-O(4)   | 1.200(5) |
| N(1)-O(5)   | 1.204(5) |
| N(1)-C(14)  | 1.466(5) |
| N(2)-O(11)  | 1.207(4) |
| N(2)-O(12)  | 1.207(5) |
| N(2)-C(32)  | 1.465(5) |
| O(1)-C(1)   | 1.203(5) |
| O(2)-C(16)  | 1.191(4) |
| O(3)-C(16)  | 1.327(4) |
| O(3)-C(17)  | 1.456(5) |
| O(9)-C(34)  | 1.194(5) |
| O(10)-C(34) | 1.324(5) |
| O(10)-C(35) | 1.462(5) |
| O(8)-C(23)  | 1.164(7) |
| O(8')-C(19) | 1.103(9) |
| C(1)-C(2)   | 1.503(6) |
| C(1)-C(6)   | 1.536(5) |
| C(2)-C(3)   | 1.529(7) |
| C(2)-H(2A)  | 0.9700   |
| C(2)-H(2B)  | 0.9700   |
| C(3)-C(4)   | 1.525(7) |
| C(3)-H(3A)  | 0.9700   |
| C(3)-H(3B)  | 0.9700   |
| C(4)-C(5)   | 1.513(6) |
| C(4)-H(4A)  | 0.9700   |
| C(4)-H(4B)  | 0.9700   |
| C(5)-C(6)   | 1.546(5) |
| C(5)-H(5A)  | 0.9700   |

|              |          |
|--------------|----------|
| C(5)-H(5B)   | 0.9700   |
| C(6)-C(16)   | 1.526(5) |
| C(6)-C(7)    | 1.535(5) |
| C(7)-C(8)    | 1.527(5) |
| C(7)-H(7A)   | 0.9700   |
| C(7)-H(7B)   | 0.9700   |
| C(8)-C(9)    | 1.511(5) |
| C(8)-H(8A)   | 0.9700   |
| C(8)-H(8B)   | 0.9700   |
| C(9)-C(10)   | 1.385(5) |
| C(9)-C(14)   | 1.392(5) |
| C(10)-C(11)  | 1.371(5) |
| C(10)-H(10)  | 0.9300   |
| C(11)-C(12)  | 1.389(5) |
| C(11)-H(11)  | 0.9300   |
| C(12)-C(13)  | 1.370(5) |
| C(13)-C(14)  | 1.386(5) |
| C(13)-H(13)  | 0.9300   |
| C(15)-H(15A) | 0.9600   |
| C(15)-H(15B) | 0.9600   |
| C(15)-H(15C) | 0.9600   |
| C(17)-C(18)  | 1.485(7) |
| C(17)-H(17A) | 0.9700   |
| C(17)-H(17B) | 0.9700   |
| C(18)-H(18A) | 0.9600   |
| C(18)-H(18B) | 0.9600   |
| C(18)-H(18C) | 0.9600   |
| C(19)-C(24)  | 1.531(6) |
| C(19)-C(20)  | 1.534(6) |
| C(19)-H(19A) | 0.96(3)  |
| C(19)-H(19B) | 0.94(3)  |
| C(20)-C(21)  | 1.520(8) |
| C(20)-H(20A) | 0.9700   |
| C(20)-H(20B) | 0.9700   |
| C(21)-C(22)  | 1.526(8) |
| C(21)-H(21A) | 0.9700   |
| C(21)-H(21B) | 0.9700   |
| C(22)-C(23)  | 1.516(6) |

|                  |            |
|------------------|------------|
| C(22)-H(22A)     | 0.9700     |
| C(22)-H(22B)     | 0.9700     |
| C(23)-C(24)      | 1.544(5)   |
| C(23)-H(23A)     | 0.95(3)    |
| C(23)-H(23B)     | 0.97(3)    |
| C(24)-C(34)      | 1.526(5)   |
| C(24)-C(25)      | 1.535(5)   |
| C(25)-C(26)      | 1.540(5)   |
| C(25)-H(25A)     | 0.9700     |
| C(25)-H(25B)     | 0.9700     |
| C(26)-C(27)      | 1.509(4)   |
| C(26)-H(26A)     | 0.9700     |
| C(26)-H(26B)     | 0.9700     |
| C(27)-C(28)      | 1.384(5)   |
| C(27)-C(32)      | 1.390(5)   |
| C(28)-C(29)      | 1.373(5)   |
| C(28)-H(28)      | 0.9300     |
| C(29)-C(30)      | 1.377(5)   |
| C(29)-H(29)      | 0.9300     |
| C(30)-C(31)      | 1.376(5)   |
| C(31)-C(32)      | 1.382(5)   |
| C(31)-H(31)      | 0.9300     |
| C(33)-H(33A)     | 0.9600     |
| C(33)-H(33B)     | 0.9600     |
| C(33)-H(33C)     | 0.9600     |
| C(35)-C(36)      | 1.458(8)   |
| C(35)-H(35A)     | 0.9700     |
| C(35)-H(35B)     | 0.9700     |
| C(36)-H(36A)     | 0.9600     |
| C(36)-H(36B)     | 0.9600     |
| C(36)-H(36C)     | 0.9600     |
| O(7)-S(1)-O(6)   | 115.9(3)   |
| O(7)-S(1)-C(15)  | 109.5(3)   |
| O(6)-S(1)-C(15)  | 109.7(3)   |
| O(7)-S(1)-C(12)  | 108.0(2)   |
| O(6)-S(1)-C(12)  | 108.2(2)   |
| C(15)-S(1)-C(12) | 104.97(18) |

|                   |            |
|-------------------|------------|
| O(14)-S(2)-O(13)  | 117.9(3)   |
| O(14)-S(2)-C(33)  | 109.7(3)   |
| O(13)-S(2)-C(33)  | 107.9(3)   |
| O(14)-S(2)-C(30)  | 108.1(2)   |
| O(13)-S(2)-C(30)  | 107.73(18) |
| C(33)-S(2)-C(30)  | 104.74(18) |
| O(4)-N(1)-O(5)    | 123.0(4)   |
| O(4)-N(1)-C(14)   | 120.0(4)   |
| O(5)-N(1)-C(14)   | 117.0(4)   |
| O(11)-N(2)-O(12)  | 122.9(4)   |
| O(11)-N(2)-C(32)  | 119.6(4)   |
| O(12)-N(2)-C(32)  | 117.4(3)   |
| C(16)-O(3)-C(17)  | 116.6(3)   |
| C(34)-O(10)-C(35) | 116.9(3)   |
| O(1)-C(1)-C(2)    | 123.1(4)   |
| O(1)-C(1)-C(6)    | 121.7(4)   |
| C(2)-C(1)-C(6)    | 115.2(3)   |
| C(1)-C(2)-C(3)    | 111.0(4)   |
| C(1)-C(2)-H(2A)   | 109.4      |
| C(3)-C(2)-H(2A)   | 109.4      |
| C(1)-C(2)-H(2B)   | 109.4      |
| C(3)-C(2)-H(2B)   | 109.4      |
| H(2A)-C(2)-H(2B)  | 108.0      |
| C(4)-C(3)-C(2)    | 110.2(4)   |
| C(4)-C(3)-H(3A)   | 109.6      |
| C(2)-C(3)-H(3A)   | 109.6      |
| C(4)-C(3)-H(3B)   | 109.6      |
| C(2)-C(3)-H(3B)   | 109.6      |
| H(3A)-C(3)-H(3B)  | 108.1      |
| C(5)-C(4)-C(3)    | 110.4(4)   |
| C(5)-C(4)-H(4A)   | 109.6      |
| C(3)-C(4)-H(4A)   | 109.6      |
| C(5)-C(4)-H(4B)   | 109.6      |
| C(3)-C(4)-H(4B)   | 109.6      |
| H(4A)-C(4)-H(4B)  | 108.1      |
| C(4)-C(5)-C(6)    | 113.9(3)   |
| C(4)-C(5)-H(5A)   | 108.8      |
| C(6)-C(5)-H(5A)   | 108.8      |



|                   |          |
|-------------------|----------|
| C(4)-C(5)-H(5B)   | 108.8    |
| C(6)-C(5)-H(5B)   | 108.8    |
| H(5A)-C(5)-H(5B)  | 107.7    |
| C(16)-C(6)-C(7)   | 107.1(3) |
| C(16)-C(6)-C(1)   | 110.0(3) |
| C(7)-C(6)-C(1)    | 110.9(3) |
| C(16)-C(6)-C(5)   | 110.7(3) |
| C(7)-C(6)-C(5)    | 111.7(3) |
| C(1)-C(6)-C(5)    | 106.6(3) |
| C(8)-C(7)-C(6)    | 113.4(3) |
| C(8)-C(7)-H(7A)   | 108.9    |
| C(6)-C(7)-H(7A)   | 108.9    |
| C(8)-C(7)-H(7B)   | 108.9    |
| C(6)-C(7)-H(7B)   | 108.9    |
| H(7A)-C(7)-H(7B)  | 107.7    |
| C(9)-C(8)-C(7)    | 113.5(3) |
| C(9)-C(8)-H(8A)   | 108.9    |
| C(7)-C(8)-H(8A)   | 108.9    |
| C(9)-C(8)-H(8B)   | 108.9    |
| C(7)-C(8)-H(8B)   | 108.9    |
| H(8A)-C(8)-H(8B)  | 107.7    |
| C(10)-C(9)-C(14)  | 116.1(3) |
| C(10)-C(9)-C(8)   | 118.4(3) |
| C(14)-C(9)-C(8)   | 125.4(3) |
| C(11)-C(10)-C(9)  | 122.7(3) |
| C(11)-C(10)-H(10) | 118.6    |
| C(9)-C(10)-H(10)  | 118.6    |
| C(10)-C(11)-C(12) | 119.2(3) |
| C(10)-C(11)-H(11) | 120.4    |
| C(12)-C(11)-H(11) | 120.4    |
| C(13)-C(12)-C(11) | 120.5(3) |
| C(13)-C(12)-S(1)  | 118.5(3) |
| C(11)-C(12)-S(1)  | 121.0(3) |
| C(12)-C(13)-C(14) | 118.7(3) |
| C(12)-C(13)-H(13) | 120.7    |
| C(14)-C(13)-H(13) | 120.7    |
| C(13)-C(14)-C(9)  | 122.8(3) |
| C(13)-C(14)-N(1)  | 115.5(3) |

|                     |          |
|---------------------|----------|
| C(9)-C(14)-N(1)     | 121.7(3) |
| S(1)-C(15)-H(15A)   | 109.5    |
| S(1)-C(15)-H(15B)   | 109.5    |
| H(15A)-C(15)-H(15B) | 109.5    |
| S(1)-C(15)-H(15C)   | 109.5    |
| H(15A)-C(15)-H(15C) | 109.5    |
| H(15B)-C(15)-H(15C) | 109.5    |
| O(2)-C(16)-O(3)     | 124.3(4) |
| O(2)-C(16)-C(6)     | 125.2(3) |
| O(3)-C(16)-C(6)     | 110.4(3) |
| O(3)-C(17)-C(18)    | 108.0(4) |
| O(3)-C(17)-H(17A)   | 110.1    |
| C(18)-C(17)-H(17A)  | 110.1    |
| O(3)-C(17)-H(17B)   | 110.1    |
| C(18)-C(17)-H(17B)  | 110.1    |
| H(17A)-C(17)-H(17B) | 108.4    |
| C(17)-C(18)-H(18A)  | 109.5    |
| C(17)-C(18)-H(18B)  | 109.5    |
| H(18A)-C(18)-H(18B) | 109.5    |
| C(17)-C(18)-H(18C)  | 109.5    |
| H(18A)-C(18)-H(18C) | 109.5    |
| H(18B)-C(18)-H(18C) | 109.5    |
| O(8')-C(19)-C(24)   | 124.4(6) |
| O(8')-C(19)-C(20)   | 121.1(6) |
| C(24)-C(19)-C(20)   | 114.5(4) |
| C(24)-C(19)-H(19A)  | 109(3)   |
| C(20)-C(19)-H(19A)  | 108(3)   |
| C(24)-C(19)-H(19B)  | 104(5)   |
| C(20)-C(19)-H(19B)  | 110(4)   |
| H(19A)-C(19)-H(19B) | 111(6)   |
| C(21)-C(20)-C(19)   | 109.4(4) |
| C(21)-C(20)-H(20A)  | 109.8    |
| C(19)-C(20)-H(20A)  | 109.8    |
| C(21)-C(20)-H(20B)  | 109.8    |
| C(19)-C(20)-H(20B)  | 109.8    |
| H(20A)-C(20)-H(20B) | 108.2    |
| C(20)-C(21)-C(22)   | 110.6(5) |
| C(20)-C(21)-H(21A)  | 109.5    |

|                     |          |
|---------------------|----------|
| C(22)-C(21)-H(21A)  | 109.5    |
| C(20)-C(21)-H(21B)  | 109.5    |
| C(22)-C(21)-H(21B)  | 109.5    |
| H(21A)-C(21)-H(21B) | 108.1    |
| C(23)-C(22)-C(21)   | 111.3(4) |
| C(23)-C(22)-H(22A)  | 109.4    |
| C(21)-C(22)-H(22A)  | 109.4    |
| C(23)-C(22)-H(22B)  | 109.4    |
| C(21)-C(22)-H(22B)  | 109.4    |
| H(22A)-C(22)-H(22B) | 108.0    |
| O(8)-C(23)-C(22)    | 122.4(4) |
| O(8)-C(23)-C(24)    | 123.9(4) |
| C(22)-C(23)-C(24)   | 113.7(4) |
| C(22)-C(23)-H(23A)  | 110(4)   |
| C(24)-C(23)-H(23A)  | 106(4)   |
| C(22)-C(23)-H(23B)  | 113(10)  |
| C(24)-C(23)-H(23B)  | 114(10)  |
| H(23A)-C(23)-H(23B) | 99(10)   |
| C(34)-C(24)-C(19)   | 109.9(3) |
| C(34)-C(24)-C(25)   | 107.5(3) |
| C(19)-C(24)-C(25)   | 111.9(3) |
| C(34)-C(24)-C(23)   | 110.7(3) |
| C(19)-C(24)-C(23)   | 107.4(3) |
| C(25)-C(24)-C(23)   | 109.3(3) |
| C(24)-C(25)-C(26)   | 113.8(3) |
| C(24)-C(25)-H(25A)  | 108.8    |
| C(26)-C(25)-H(25A)  | 108.8    |
| C(24)-C(25)-H(25B)  | 108.8    |
| C(26)-C(25)-H(25B)  | 108.8    |
| H(25A)-C(25)-H(25B) | 107.7    |
| C(27)-C(26)-C(25)   | 111.7(3) |
| C(27)-C(26)-H(26A)  | 109.3    |
| C(25)-C(26)-H(26A)  | 109.3    |
| C(27)-C(26)-H(26B)  | 109.3    |
| C(25)-C(26)-H(26B)  | 109.3    |
| H(26A)-C(26)-H(26B) | 107.9    |
| C(28)-C(27)-C(32)   | 116.3(3) |
| C(28)-C(27)-C(26)   | 118.7(3) |

|                     |          |
|---------------------|----------|
| C(32)-C(27)-C(26)   | 124.9(3) |
| C(29)-C(28)-C(27)   | 122.5(3) |
| C(29)-C(28)-H(28)   | 118.7    |
| C(27)-C(28)-H(28)   | 118.7    |
| C(28)-C(29)-C(30)   | 119.2(3) |
| C(28)-C(29)-H(29)   | 120.4    |
| C(30)-C(29)-H(29)   | 120.4    |
| C(31)-C(30)-C(29)   | 120.8(3) |
| C(31)-C(30)-S(2)    | 118.4(3) |
| C(29)-C(30)-S(2)    | 120.8(3) |
| C(30)-C(31)-C(32)   | 118.5(3) |
| C(30)-C(31)-H(31)   | 120.8    |
| C(32)-C(31)-H(31)   | 120.8    |
| C(31)-C(32)-C(27)   | 122.6(3) |
| C(31)-C(32)-N(2)    | 114.9(3) |
| C(27)-C(32)-N(2)    | 122.5(3) |
| S(2)-C(33)-H(33A)   | 109.5    |
| S(2)-C(33)-H(33B)   | 109.5    |
| H(33A)-C(33)-H(33B) | 109.5    |
| S(2)-C(33)-H(33C)   | 109.5    |
| H(33A)-C(33)-H(33C) | 109.5    |
| H(33B)-C(33)-H(33C) | 109.5    |
| O(9)-C(34)-O(10)    | 124.4(4) |
| O(9)-C(34)-C(24)    | 124.4(4) |
| O(10)-C(34)-C(24)   | 111.2(3) |
| C(36)-C(35)-O(10)   | 109.2(4) |
| C(36)-C(35)-H(35A)  | 109.8    |
| O(10)-C(35)-H(35A)  | 109.8    |
| C(36)-C(35)-H(35B)  | 109.8    |
| O(10)-C(35)-H(35B)  | 109.8    |
| H(35A)-C(35)-H(35B) | 108.3    |
| C(35)-C(36)-H(36A)  | 109.5    |
| C(35)-C(36)-H(36B)  | 109.5    |
| H(36A)-C(36)-H(36B) | 109.5    |
| C(35)-C(36)-H(36C)  | 109.5    |
| H(36A)-C(36)-H(36C) | 109.5    |
| H(36B)-C(36)-H(36C) | 109.5    |

Symmetry transformations used to generate equivalent atoms:

Table 4. Anisotropic displacement parameters ( $\text{\AA}^2 \times 10^3$ ) for cd214673. The anisotropic displacement factor exponent takes the form:  $-2\pi^2 [h^2 a^{*2} U^{11} + \dots + 2 h k a^* b^* U^{12}]$

|       | U <sup>11</sup> | U <sup>22</sup> | U <sup>33</sup> | U <sup>23</sup> | U <sup>13</sup> | U <sup>12</sup> |
|-------|-----------------|-----------------|-----------------|-----------------|-----------------|-----------------|
| S(1)  | 44(1)           | 75(1)           | 41(1)           | -3(1)           | 5(1)            | 2(1)            |
| S(2)  | 39(1)           | 67(1)           | 47(1)           | -3(1)           | -10(1)          | 3(1)            |
| N(1)  | 56(2)           | 52(2)           | 87(3)           | 3(2)            | 0(2)            | -11(2)          |
| N(2)  | 46(2)           | 49(2)           | 88(2)           | -2(2)           | -5(2)           | -10(2)          |
| O(1)  | 54(2)           | 71(2)           | 68(2)           | 18(2)           | -14(1)          | 4(1)            |
| O(2)  | 72(2)           | 70(2)           | 63(2)           | 25(2)           | -14(1)          | -5(2)           |
| O(3)  | 56(2)           | 48(2)           | 58(2)           | 10(1)           | -8(1)           | -11(1)          |
| O(4)  | 52(2)           | 75(2)           | 151(4)          | -8(2)           | 12(2)           | -20(2)          |
| O(5)  | 90(3)           | 55(2)           | 173(4)          | -26(3)          | 25(3)           | -19(2)          |
| O(6)  | 117(3)          | 105(3)          | 107(3)          | 40(3)           | 61(3)           | 23(2)           |
| O(7)  | 74(2)           | 133(4)          | 91(3)           | -53(3)          | 24(2)           | -16(2)          |
| O(9)  | 80(2)           | 74(2)           | 60(2)           | -23(2)          | 6(2)            | -6(2)           |
| O(10) | 57(2)           | 50(2)           | 71(2)           | -15(1)          | 8(1)            | -13(1)          |
| O(11) | 42(2)           | 78(2)           | 132(3)          | 4(2)            | -12(2)          | -15(2)          |
| O(12) | 78(2)           | 48(2)           | 209(5)          | 31(3)           | -27(3)          | -16(2)          |
| O(13) | 66(2)           | 138(3)          | 57(2)           | 27(2)           | -12(1)          | -6(2)           |
| O(14) | 80(2)           | 74(2)           | 120(3)          | -19(2)          | -52(2)          | 1(2)            |
| O(8)  | 52(3)           | 78(4)           | 63(3)           | -15(3)          | 17(2)           | 1(3)            |
| O(8') | 51(5)           | 86(7)           | 95(6)           | 25(5)           | 22(4)           | 2(5)            |
| C(1)  | 38(2)           | 43(2)           | 66(2)           | 7(2)            | -7(2)           | -4(2)           |
| C(2)  | 45(2)           | 81(3)           | 85(3)           | 6(3)            | 7(2)            | 16(2)           |
| C(3)  | 76(3)           | 82(4)           | 84(3)           | -15(3)          | 9(3)            | 20(3)           |
| C(4)  | 70(3)           | 73(3)           | 58(2)           | -7(2)           | 2(2)            | 8(2)            |
| C(5)  | 44(2)           | 62(2)           | 51(2)           | -5(2)           | -7(2)           | 1(2)            |
| C(6)  | 35(2)           | 45(2)           | 45(2)           | 4(2)            | -2(1)           | -1(1)           |
| C(7)  | 35(2)           | 51(2)           | 40(2)           | 8(2)            | -3(1)           | -3(2)           |
| C(8)  | 39(2)           | 74(3)           | 45(2)           | 13(2)           | 1(1)            | 8(2)            |
| C(9)  | 35(2)           | 54(2)           | 39(2)           | 6(2)            | -5(1)           | 6(2)            |
| C(10) | 44(2)           | 57(2)           | 46(2)           | -11(2)          | -2(1)           | 1(2)            |
| C(11) | 39(2)           | 51(2)           | 56(2)           | -6(2)           | 1(2)            | -7(2)           |
| C(12) | 34(2)           | 54(2)           | 41(2)           | -4(2)           | 1(1)            | 4(2)            |
| C(13) | 43(2)           | 46(2)           | 47(2)           | -6(2)           | -3(1)           | 2(2)            |
| C(14) | 36(2)           | 45(2)           | 53(2)           | 5(2)            | -4(1)           | -2(2)           |

|       |        |        |        |        |        |        |
|-------|--------|--------|--------|--------|--------|--------|
| C(15) | 37(2)  | 207(8) | 62(3)  | 19(4)  | 5(2)   | 13(3)  |
| C(16) | 36(2)  | 52(2)  | 48(2)  | 5(2)   | 4(1)   | -2(2)  |
| C(17) | 76(3)  | 46(2)  | 82(3)  | 13(2)  | -9(2)  | -15(2) |
| C(18) | 93(4)  | 57(3)  | 113(4) | 1(3)   | -13(3) | -24(3) |
| C(19) | 49(2)  | 60(3)  | 53(2)  | 4(2)   | 7(2)   | 7(2)   |
| C(20) | 76(3)  | 95(4)  | 65(3)  | 22(3)  | -5(2)  | 10(3)  |
| C(21) | 74(3)  | 95(4)  | 96(4)  | 25(3)  | -9(3)  | 27(3)  |
| C(22) | 43(2)  | 81(3)  | 108(4) | 3(3)   | 0(2)   | 17(2)  |
| C(23) | 39(2)  | 46(2)  | 75(3)  | -3(2)  | 10(2)  | -1(2)  |
| C(24) | 32(2)  | 48(2)  | 49(2)  | -2(2)  | 0(1)   | -1(1)  |
| C(25) | 35(2)  | 50(2)  | 40(2)  | -6(2)  | 1(1)   | -5(2)  |
| C(26) | 40(2)  | 70(2)  | 43(2)  | -9(2)  | -5(1)  | 9(2)   |
| C(27) | 33(2)  | 55(2)  | 40(2)  | -4(2)  | 2(1)   | 6(2)   |
| C(28) | 42(2)  | 60(2)  | 44(2)  | 11(2)  | 1(1)   | -2(2)  |
| C(29) | 37(2)  | 54(2)  | 56(2)  | 6(2)   | 2(1)   | -6(2)  |
| C(30) | 34(2)  | 55(2)  | 43(2)  | -2(2)  | -5(1)  | 3(2)   |
| C(31) | 40(2)  | 48(2)  | 44(2)  | 4(2)   | 2(1)   | 1(2)   |
| C(32) | 36(2)  | 46(2)  | 46(2)  | -7(2)  | 2(1)   | -3(2)  |
| C(33) | 44(2)  | 118(4) | 59(2)  | -12(3) | -8(2)  | 19(2)  |
| C(34) | 39(2)  | 51(2)  | 51(2)  | -6(2)  | -10(1) | 2(2)   |
| C(35) | 84(4)  | 51(3)  | 104(4) | -21(3) | 17(3)  | -20(2) |
| C(36) | 105(4) | 62(3)  | 96(4)  | 0(3)   | 3(3)   | -33(3) |

---

Table 5. Hydrogen coordinates ( $\times 10^4$ ) and isotropic displacement parameters ( $\text{\AA}^2 \times 10^{-3}$ ) for cd214673.

|        | x          | y         | z        | U(eq)   |
|--------|------------|-----------|----------|---------|
| H(19A) | 9750(60)   | 4810(30)  | 4820(30) | 23(13)  |
| H(19B) | 9460(60)   | 5810(50)  | 5280(40) | 50(20)  |
| H(23A) | 11630(60)  | 4810(30)  | 3610(40) | 46(14)  |
| H(23B) | 12450(170) | 5650(130) | 3340(70) | 110(70) |
| H(2A)  | 13931      | -232      | 535      | 84      |
| H(2B)  | 13598      | 756       | 61       | 84      |
| H(3A)  | 13149      | -468      | -991     | 97      |
| H(3B)  | 12158      | -997      | -299     | 97      |
| H(4A)  | 11557      | 811       | -1119    | 80      |
| H(4B)  | 10759      | -151      | -1343    | 80      |
| H(5A)  | 9827       | -195      | 118      | 63      |
| H(5B)  | 9419       | 781       | -348     | 63      |
| H(7A)  | 9454       | 454       | 1666     | 50      |
| H(7B)  | 10278      | 1361      | 2011     | 50      |
| H(8A)  | 8871       | 2370      | 1130     | 63      |
| H(8B)  | 8113       | 1483      | 688      | 63      |
| H(10)  | 6395       | 597       | 1520     | 59      |
| H(11)  | 4631       | 574       | 2574     | 58      |
| H(13)  | 6185       | 2982      | 3702     | 55      |
| H(15A) | 1557       | 2004      | 3835     | 153     |
| H(15B) | 2271       | 1611      | 2949     | 153     |
| H(15C) | 2415       | 2702      | 3209     | 153     |
| H(17A) | 11855      | 3776      | 1029     | 81      |
| H(17B) | 12834      | 3448      | 225      | 81      |
| H(18A) | 13620      | 3501      | 2067     | 132     |
| H(18B) | 14225      | 4171      | 1304     | 132     |
| H(18C) | 14586      | 3070      | 1307     | 132     |
| H(20A) | 11593      | 5721      | 6069     | 95      |
| H(20B) | 10757      | 4768      | 6269     | 95      |
| H(21A) | 12038      | 3945      | 5160     | 107     |
| H(21B) | 13102      | 4412      | 5851     | 107     |
| H(22A) | 13535      | 5679      | 4842     | 93      |



|        |       |      |      |     |
|--------|-------|------|------|-----|
| H(22B) | 13822 | 4704 | 4336 | 93  |
| H(25A) | 9298  | 5497 | 3314 | 50  |
| H(25B) | 10177 | 6370 | 2952 | 50  |
| H(26A) | 8087  | 6602 | 4311 | 61  |
| H(26B) | 8869  | 7449 | 3820 | 61  |
| H(28)  | 6325  | 5684 | 3504 | 59  |
| H(29)  | 4533  | 5650 | 2458 | 59  |
| H(31)  | 6109  | 8007 | 1264 | 53  |
| H(33A) | 1530  | 7347 | 1135 | 111 |
| H(33B) | 2578  | 8027 | 1653 | 111 |
| H(33C) | 2173  | 7027 | 2073 | 111 |
| H(35A) | 11884 | 8782 | 4016 | 95  |
| H(35B) | 12826 | 8392 | 4818 | 95  |
| H(36A) | 14563 | 8034 | 3751 | 132 |
| H(36B) | 14255 | 9141 | 3820 | 132 |
| H(36C) | 13638 | 8542 | 3006 | 132 |

---

Table 6. Torsion angles [°] for cd214673.

---

|                         |           |
|-------------------------|-----------|
| O(1)-C(1)-C(2)-C(3)     | 122.2(5)  |
| C(6)-C(1)-C(2)-C(3)     | -55.6(5)  |
| C(1)-C(2)-C(3)-C(4)     | 54.9(6)   |
| C(2)-C(3)-C(4)-C(5)     | -56.4(6)  |
| C(3)-C(4)-C(5)-C(6)     | 58.3(6)   |
| O(1)-C(1)-C(6)-C(16)    | 115.2(4)  |
| C(2)-C(1)-C(6)-C(16)    | -66.9(4)  |
| O(1)-C(1)-C(6)-C(7)     | -3.0(5)   |
| C(2)-C(1)-C(6)-C(7)     | 174.9(3)  |
| O(1)-C(1)-C(6)-C(5)     | -124.8(4) |
| C(2)-C(1)-C(6)-C(5)     | 53.1(4)   |
| C(4)-C(5)-C(6)-C(16)    | 65.4(4)   |
| C(4)-C(5)-C(6)-C(7)     | -175.4(3) |
| C(4)-C(5)-C(6)-C(1)     | -54.2(5)  |
| C(16)-C(6)-C(7)-C(8)    | 55.3(4)   |
| C(1)-C(6)-C(7)-C(8)     | 175.2(3)  |
| C(5)-C(6)-C(7)-C(8)     | -66.0(4)  |
| C(6)-C(7)-C(8)-C(9)     | 174.3(3)  |
| C(7)-C(8)-C(9)-C(10)    | -88.6(4)  |
| C(7)-C(8)-C(9)-C(14)    | 94.9(5)   |
| C(14)-C(9)-C(10)-C(11)  | -1.4(5)   |
| C(8)-C(9)-C(10)-C(11)   | -178.2(3) |
| C(9)-C(10)-C(11)-C(12)  | 2.2(6)    |
| C(10)-C(11)-C(12)-C(13) | -0.8(5)   |
| C(10)-C(11)-C(12)-S(1)  | 179.9(3)  |
| O(7)-S(1)-C(12)-C(13)   | -4.5(4)   |
| O(6)-S(1)-C(12)-C(13)   | -130.6(4) |
| C(15)-S(1)-C(12)-C(13)  | 112.3(4)  |
| O(7)-S(1)-C(12)-C(11)   | 174.8(3)  |
| O(6)-S(1)-C(12)-C(11)   | 48.6(4)   |
| C(15)-S(1)-C(12)-C(11)  | -68.5(4)  |
| C(11)-C(12)-C(13)-C(14) | -1.2(5)   |
| S(1)-C(12)-C(13)-C(14)  | 178.0(3)  |
| C(12)-C(13)-C(14)-C(9)  | 2.1(5)    |
| C(12)-C(13)-C(14)-N(1)  | -179.1(3) |
| C(10)-C(9)-C(14)-C(13)  | -0.8(5)   |

|                         |           |
|-------------------------|-----------|
| C(8)-C(9)-C(14)-C(13)   | 175.7(3)  |
| C(10)-C(9)-C(14)-N(1)   | -179.5(3) |
| C(8)-C(9)-C(14)-N(1)    | -2.9(5)   |
| O(4)-N(1)-C(14)-C(13)   | 150.6(4)  |
| O(5)-N(1)-C(14)-C(13)   | -28.4(6)  |
| O(4)-N(1)-C(14)-C(9)    | -30.7(6)  |
| O(5)-N(1)-C(14)-C(9)    | 150.3(4)  |
| C(17)-O(3)-C(16)-O(2)   | 2.9(6)    |
| C(17)-O(3)-C(16)-C(6)   | -174.8(3) |
| C(7)-C(6)-C(16)-O(2)    | -101.2(4) |
| C(1)-C(6)-C(16)-O(2)    | 138.3(4)  |
| C(5)-C(6)-C(16)-O(2)    | 20.8(5)   |
| C(7)-C(6)-C(16)-O(3)    | 76.5(3)   |
| C(1)-C(6)-C(16)-O(3)    | -44.0(4)  |
| C(5)-C(6)-C(16)-O(3)    | -161.6(3) |
| C(16)-O(3)-C(17)-C(18)  | -165.8(4) |
| O(8')-C(19)-C(20)-C(21) | 125.4(9)  |
| C(24)-C(19)-C(20)-C(21) | -57.7(6)  |
| C(19)-C(20)-C(21)-C(22) | 56.4(7)   |
| C(20)-C(21)-C(22)-C(23) | -56.7(7)  |
| C(21)-C(22)-C(23)-O(8)  | -126.4(6) |
| C(21)-C(22)-C(23)-C(24) | 56.0(6)   |
| O(8')-C(19)-C(24)-C(34) | 110.6(9)  |
| C(20)-C(19)-C(24)-C(34) | -66.2(5)  |
| O(8')-C(19)-C(24)-C(25) | -8.8(10)  |
| C(20)-C(19)-C(24)-C(25) | 174.4(4)  |
| O(8')-C(19)-C(24)-C(23) | -128.8(9) |
| C(20)-C(19)-C(24)-C(23) | 54.4(5)   |
| O(8)-C(23)-C(24)-C(34)  | -110.5(6) |
| C(22)-C(23)-C(24)-C(34) | 67.1(4)   |
| O(8)-C(23)-C(24)-C(19)  | 129.5(6)  |
| C(22)-C(23)-C(24)-C(19) | -53.0(5)  |
| O(8)-C(23)-C(24)-C(25)  | 7.8(7)    |
| C(22)-C(23)-C(24)-C(25) | -174.6(4) |
| C(34)-C(24)-C(25)-C(26) | -52.3(4)  |
| C(19)-C(24)-C(25)-C(26) | 68.6(4)   |
| C(23)-C(24)-C(25)-C(26) | -172.6(3) |
| C(24)-C(25)-C(26)-C(27) | -172.2(3) |

|                         |           |
|-------------------------|-----------|
| C(25)-C(26)-C(27)-C(28) | 86.3(4)   |
| C(25)-C(26)-C(27)-C(32) | -96.2(4)  |
| C(32)-C(27)-C(28)-C(29) | 0.9(5)    |
| C(26)-C(27)-C(28)-C(29) | 178.7(3)  |
| C(27)-C(28)-C(29)-C(30) | -1.7(6)   |
| C(28)-C(29)-C(30)-C(31) | 0.5(5)    |
| C(28)-C(29)-C(30)-S(2)  | -179.6(3) |
| O(14)-S(2)-C(30)-C(31)  | 143.4(3)  |
| O(13)-S(2)-C(30)-C(31)  | 15.0(4)   |
| C(33)-S(2)-C(30)-C(31)  | -99.7(3)  |
| O(14)-S(2)-C(30)-C(29)  | -36.4(4)  |
| O(13)-S(2)-C(30)-C(29)  | -164.8(3) |
| C(33)-S(2)-C(30)-C(29)  | 80.5(4)   |
| C(29)-C(30)-C(31)-C(32) | 1.3(5)    |
| S(2)-C(30)-C(31)-C(32)  | -178.6(3) |
| C(30)-C(31)-C(32)-C(27) | -2.1(5)   |
| C(30)-C(31)-C(32)-N(2)  | 178.2(3)  |
| C(28)-C(27)-C(32)-C(31) | 1.0(5)    |
| C(26)-C(27)-C(32)-C(31) | -176.6(3) |
| C(28)-C(27)-C(32)-N(2)  | -179.3(3) |
| C(26)-C(27)-C(32)-N(2)  | 3.1(5)    |
| O(11)-N(2)-C(32)-C(31)  | -152.2(4) |
| O(12)-N(2)-C(32)-C(31)  | 26.4(6)   |
| O(11)-N(2)-C(32)-C(27)  | 28.1(6)   |
| O(12)-N(2)-C(32)-C(27)  | -153.3(5) |
| C(35)-O(10)-C(34)-O(9)  | -1.3(6)   |
| C(35)-O(10)-C(34)-C(24) | 176.1(4)  |
| C(19)-C(24)-C(34)-O(9)  | -20.3(5)  |
| C(25)-C(24)-C(34)-O(9)  | 101.8(4)  |
| C(23)-C(24)-C(34)-O(9)  | -138.8(4) |
| C(19)-C(24)-C(34)-O(10) | 162.3(3)  |
| C(25)-C(24)-C(34)-O(10) | -75.6(3)  |
| C(23)-C(24)-C(34)-O(10) | 43.8(4)   |
| C(34)-O(10)-C(35)-C(36) | 162.4(4)  |

---

Symmetry transformations used to generate equivalent atoms:

Table 7. Hydrogen bonds for cd214673 [ $\text{\AA}$  and  $^\circ$ ].

| D-H...A                | d(D-H) | d(H...A) | d(D...A)  | $\angle(\text{DHA})$ |
|------------------------|--------|----------|-----------|----------------------|
| C(11)-H(11)...O(1)#1   | 0.93   | 2.58     | 3.360(4)  | 141.2                |
| C(18)-H(18B)...O(14)#2 | 0.96   | 2.61     | 3.420(7)  | 142.0                |
| C(20)-H(20A)...O(9)    | 0.97   | 2.65     | 3.182(7)  | 115.1                |
| C(29)-H(29)...O(8)#1   | 0.93   | 2.53     | 3.338(7)  | 145.4                |
| C(33)-H(33A)...O(2)#3  | 0.96   | 2.62     | 3.572(5)  | 173.7                |
| C(35)-H(35A)...O(8')#4 | 0.97   | 2.52     | 3.237(11) | 130.3                |
| C(36)-H(36B)...O(6)#5  | 0.96   | 2.62     | 3.471(8)  | 147.5                |
| C(11)-H(11)...O(1)#1   | 0.93   | 2.58     | 3.360(4)  | 141.2                |
| C(18)-H(18B)...O(14)#2 | 0.96   | 2.61     | 3.420(7)  | 142.0                |
| C(20)-H(20A)...O(9)    | 0.97   | 2.65     | 3.182(7)  | 115.1                |
| C(29)-H(29)...O(8)#1   | 0.93   | 2.53     | 3.338(7)  | 145.4                |
| C(33)-H(33A)...O(2)#3  | 0.96   | 2.62     | 3.572(5)  | 173.7                |
| C(35)-H(35A)...O(8')#4 | 0.97   | 2.52     | 3.237(11) | 130.3                |
| C(36)-H(36B)...O(6)#5  | 0.96   | 2.62     | 3.471(8)  | 147.5                |
| C(11)-H(11)...O(1)#1   | 0.93   | 2.58     | 3.360(4)  | 141.2                |
| C(18)-H(18B)...O(14)#2 | 0.96   | 2.61     | 3.420(7)  | 142.0                |
| C(20)-H(20A)...O(9)    | 0.97   | 2.65     | 3.182(7)  | 115.1                |
| C(29)-H(29)...O(8)#1   | 0.93   | 2.53     | 3.338(7)  | 145.4                |
| C(33)-H(33A)...O(2)#3  | 0.96   | 2.62     | 3.572(5)  | 173.7                |
| C(35)-H(35A)...O(8')#4 | 0.97   | 2.52     | 3.237(11) | 130.3                |
| C(36)-H(36B)...O(6)#5  | 0.96   | 2.62     | 3.471(8)  | 147.5                |
| C(11)-H(11)...O(1)#1   | 0.93   | 2.58     | 3.360(4)  | 141.2                |
| C(18)-H(18B)...O(14)#2 | 0.96   | 2.61     | 3.420(7)  | 142.0                |
| C(20)-H(20A)...O(9)    | 0.97   | 2.65     | 3.182(7)  | 115.1                |
| C(29)-H(29)...O(8)#1   | 0.93   | 2.53     | 3.338(7)  | 145.4                |
| C(33)-H(33A)...O(2)#3  | 0.96   | 2.62     | 3.572(5)  | 173.7                |
| C(35)-H(35A)...O(8')#4 | 0.97   | 2.52     | 3.237(11) | 130.3                |
| C(36)-H(36B)...O(6)#5  | 0.96   | 2.62     | 3.471(8)  | 147.5                |

Symmetry transformations used to generate equivalent atoms:

#1  $x-1,y,z$  #2  $x+1,y,z$  #3  $-x+1,y+1/2,-z$  #4  $-x+2,y+1/2,-z+1$ #5  $x+1,y+1,z$

## 7. References

- (1). X.-J. Zhang, S.-P. Liu, J.-H. Lao, G.-J. Du, M. Yan, A.S.C. Chan, *Tetrahedron: Asymmetry* 2009, **20**, 1451.
- (2). T.-X. He, J.-Y. Qian, H.-L. Song, X.-Y. Wu, *Synlett*. 2009, **19**, 3195.
- (3). S.-Z. Luo, H. Xu, J.-Y. Li, L. Zhang, J.-P. Cheng, *J. Am. Chem. Soc.* 2007, **129**, 3074.
- (4). S.-Z. Luo, Y.-P. Qiao, L. Zhang, J.-Y. Li, X. Li, J.-P. Cheng, *J. Org. Chem.* 2009, **74**, 9521.
- (5). S.-N. Wang, X.-M. Li, H.-W. L. Liu, Xu, J.-C. Zhuang, J. Li, H. Li, W. Wang, *J. Am. Chem. Soc.* 2015, **137**, 2303.

## 8. <sup>1</sup>H and <sup>13</sup>C-NMR spectra

### (*R*)-Ethyl 1-(2,4-dinitrophenethyl)-2-oxocyclohexanecarboxylate (3a)

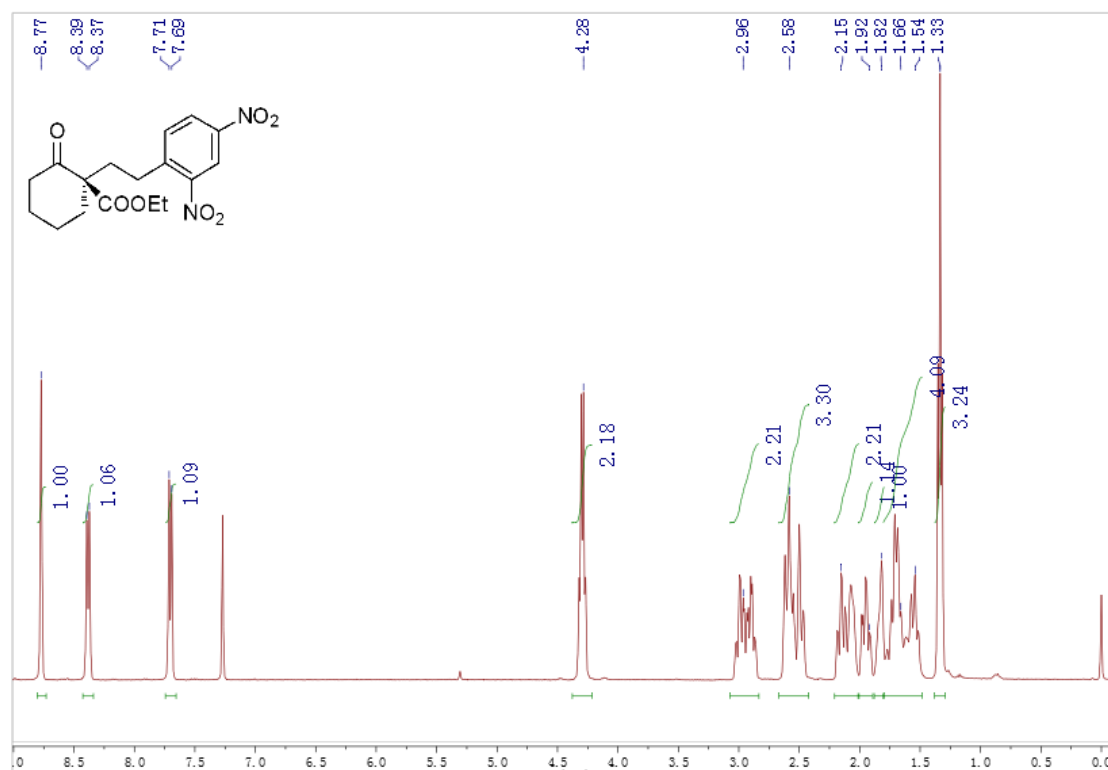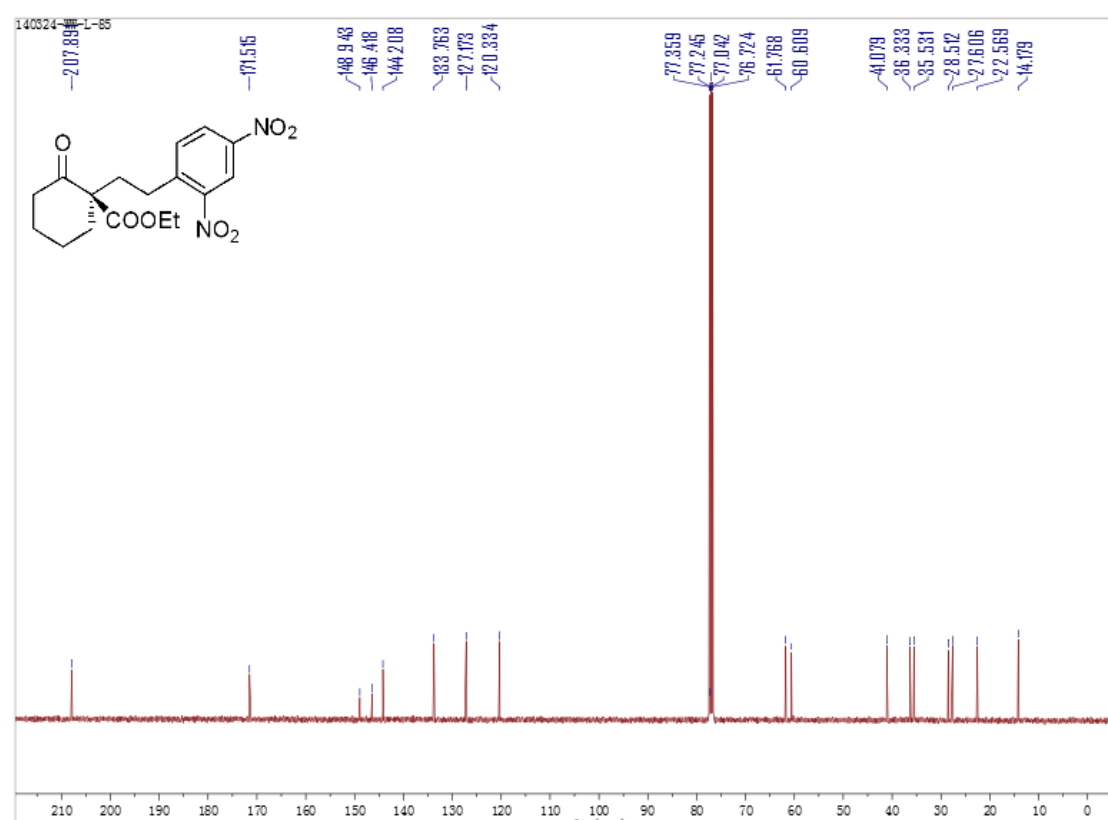

**(R)-2-Acetyl-2-(2,4-dinitrophenethyl)cyclohexanone (3b)**

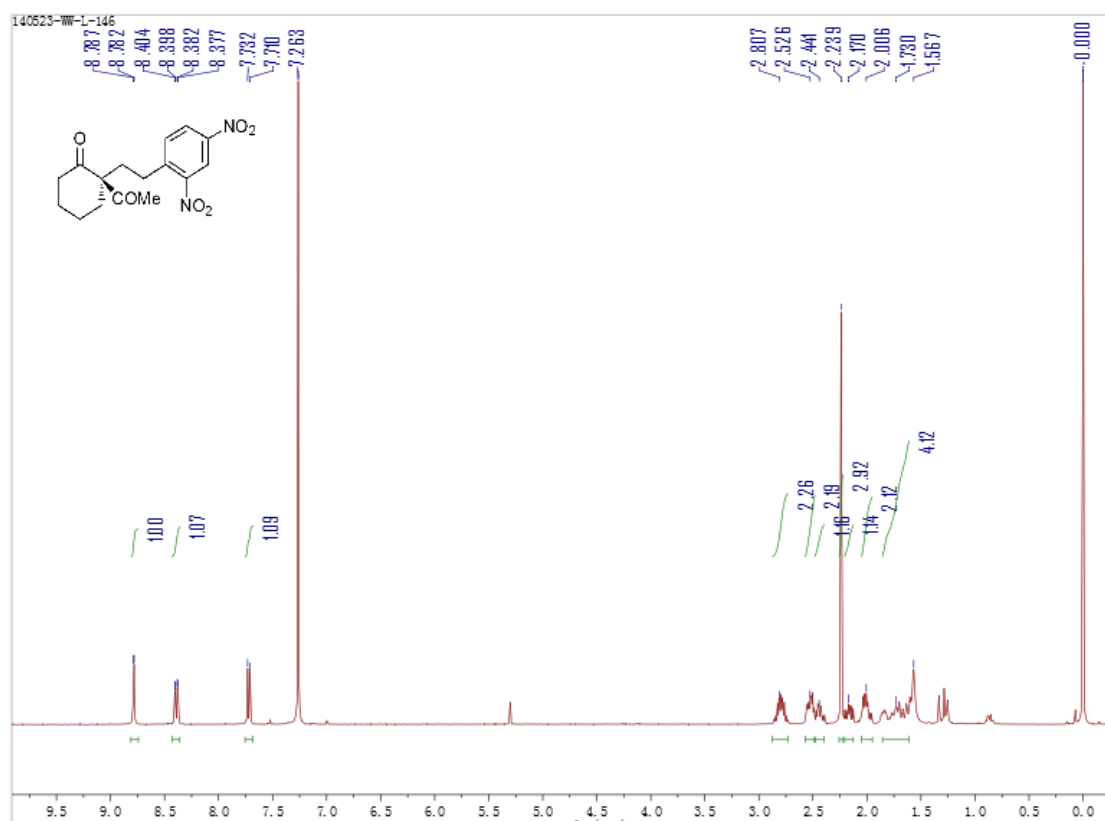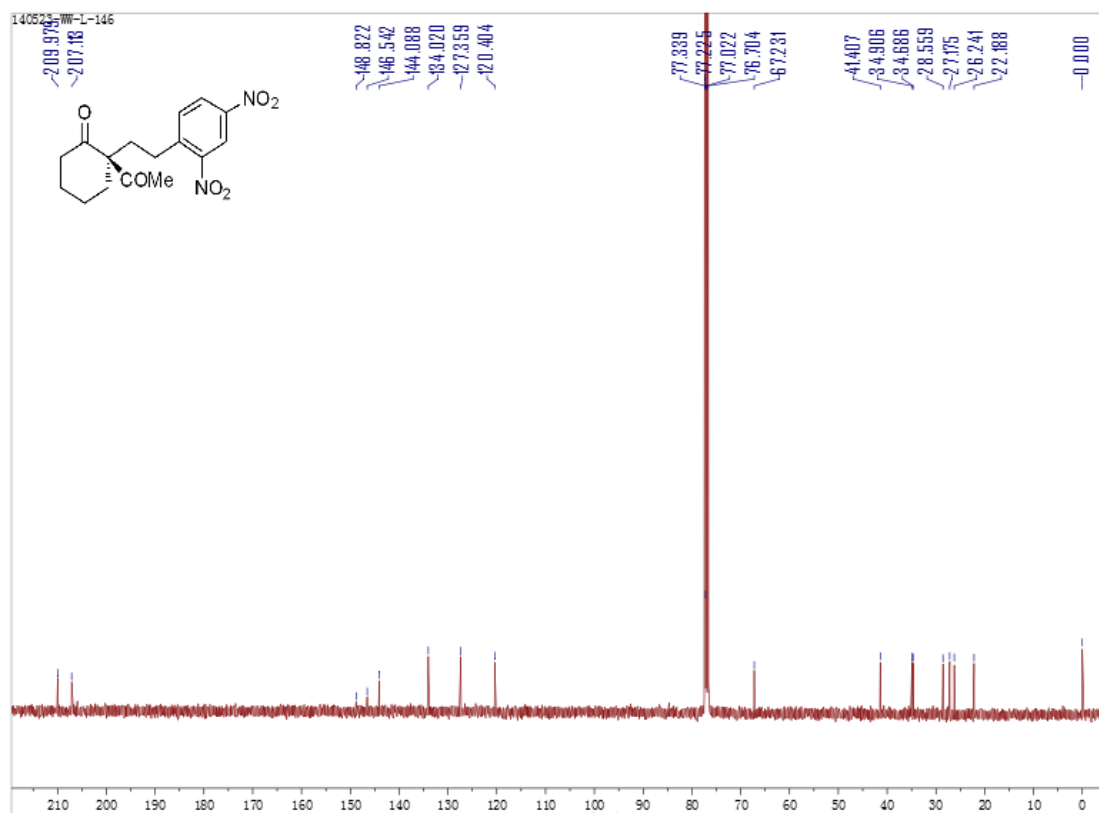



**(R)-2-(2,4-Dinitrophenethyl)-2-isobutyrylcyclohexanone (3c)**

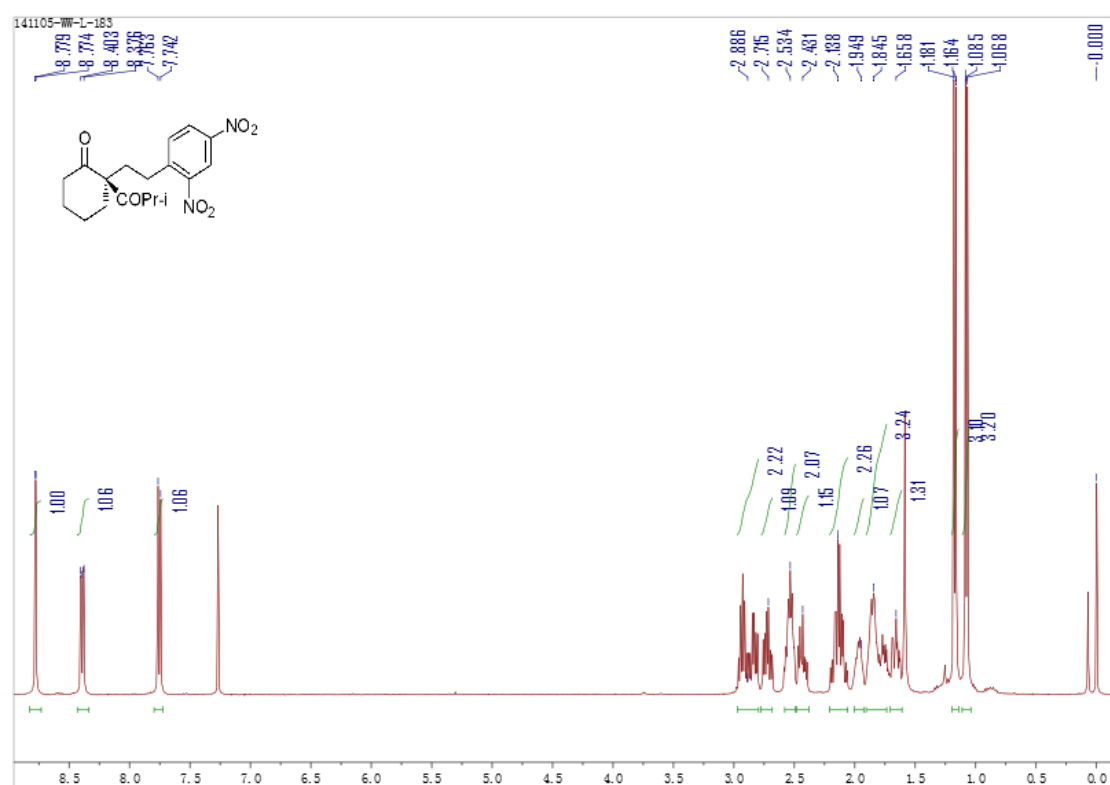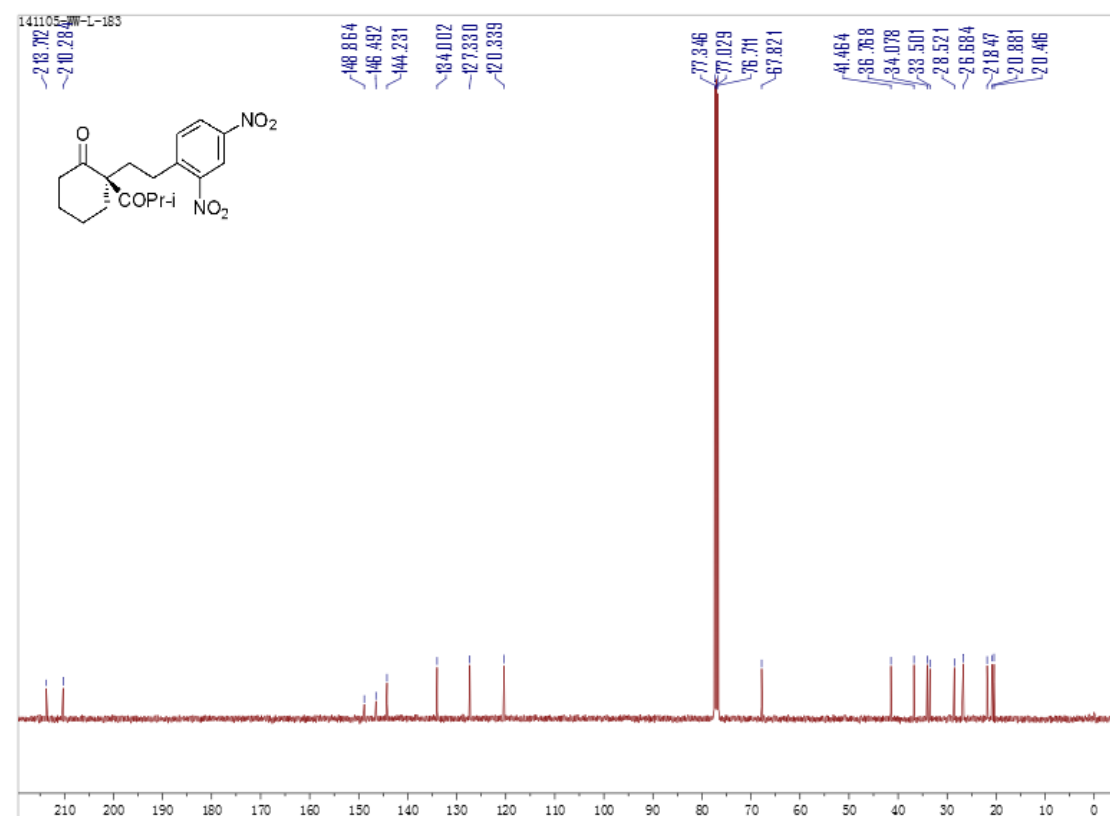

**(R)-Ethyl 2-acetyl-4-(2,4-dinitrophenyl)-2-methylbutanoate (3d)**

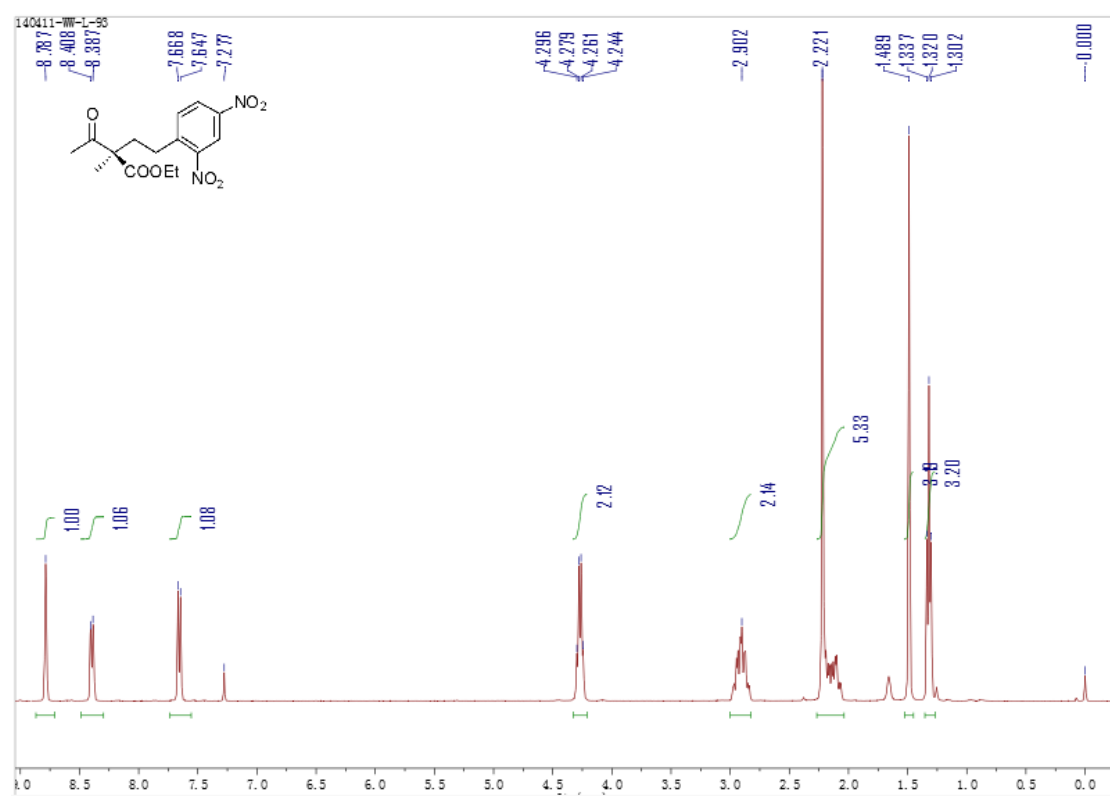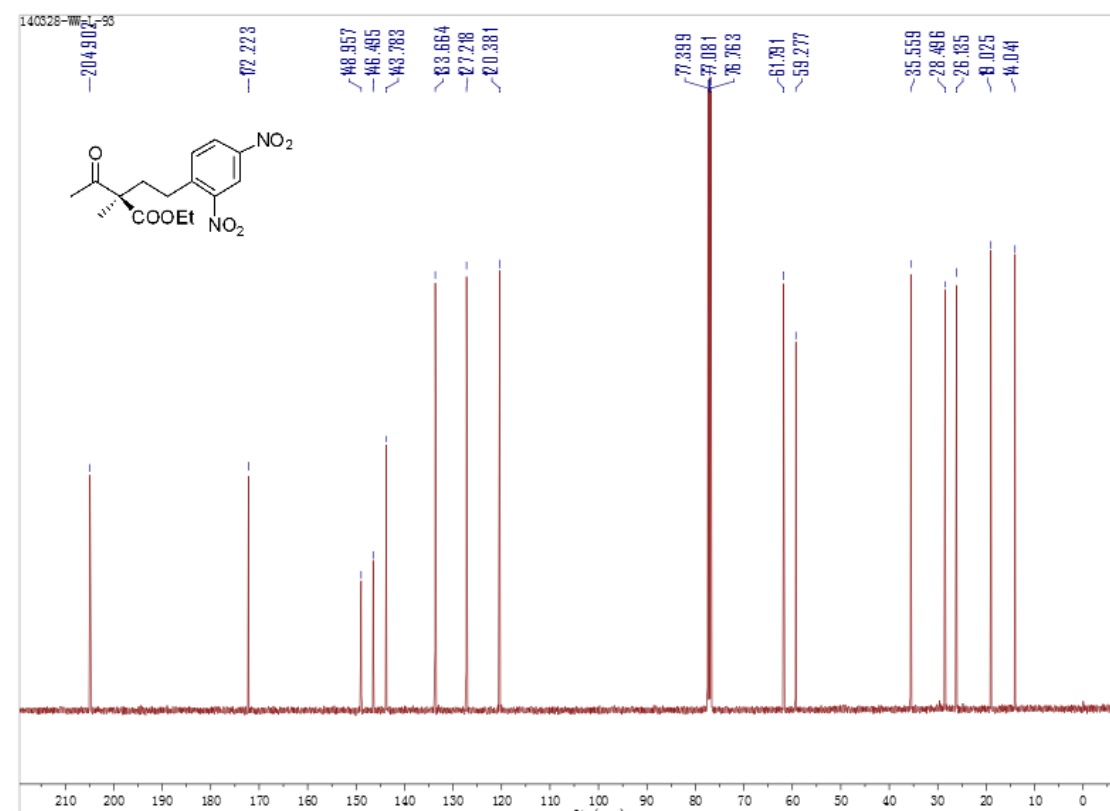

**(R)-Ethyl 2-acetyl-4-(2,4-dinitrophenyl)-2-ethylbutanoate (3e)**

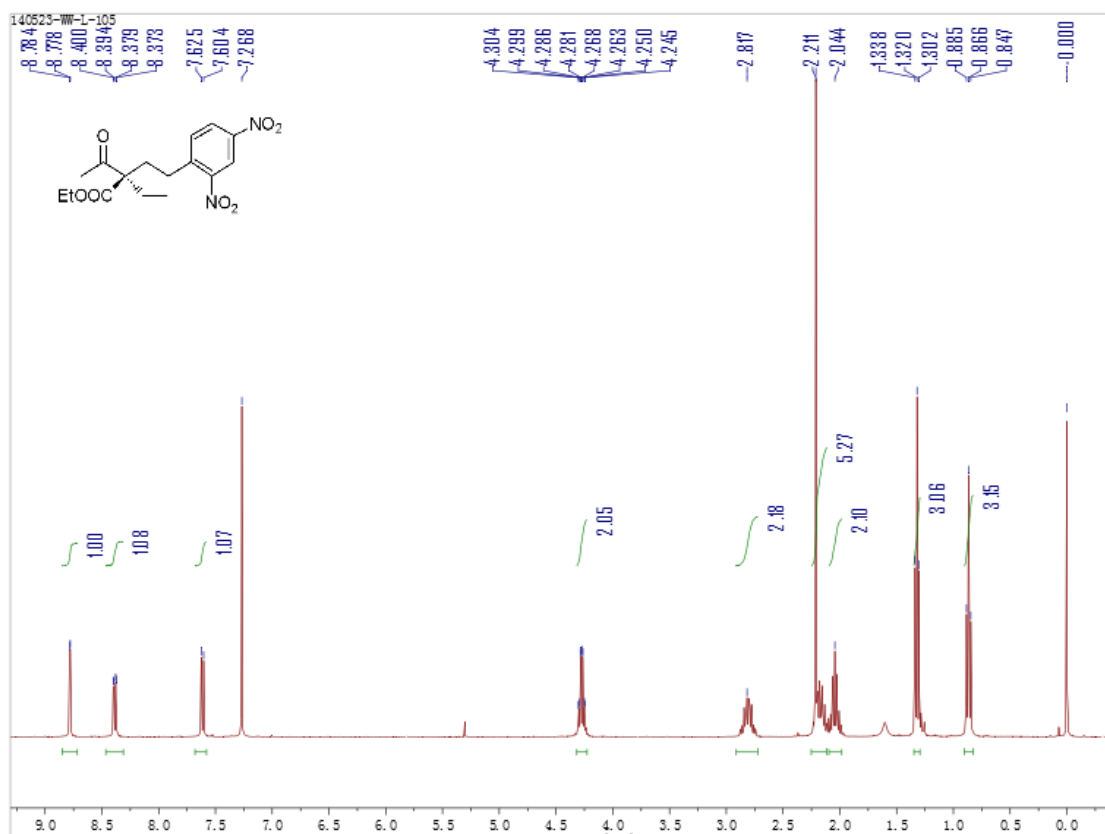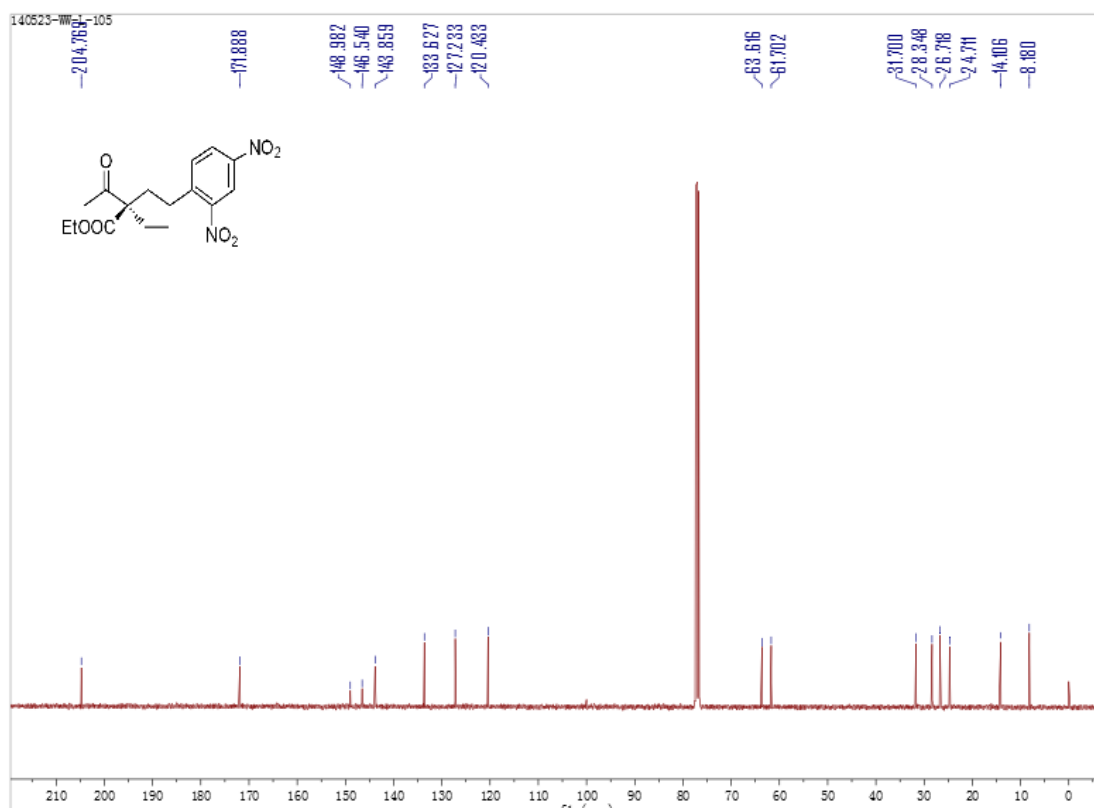

**(R)-Ethyl 2-acetyl-2-(2,4-dinitrophenethyl)hexanoate (3f)**

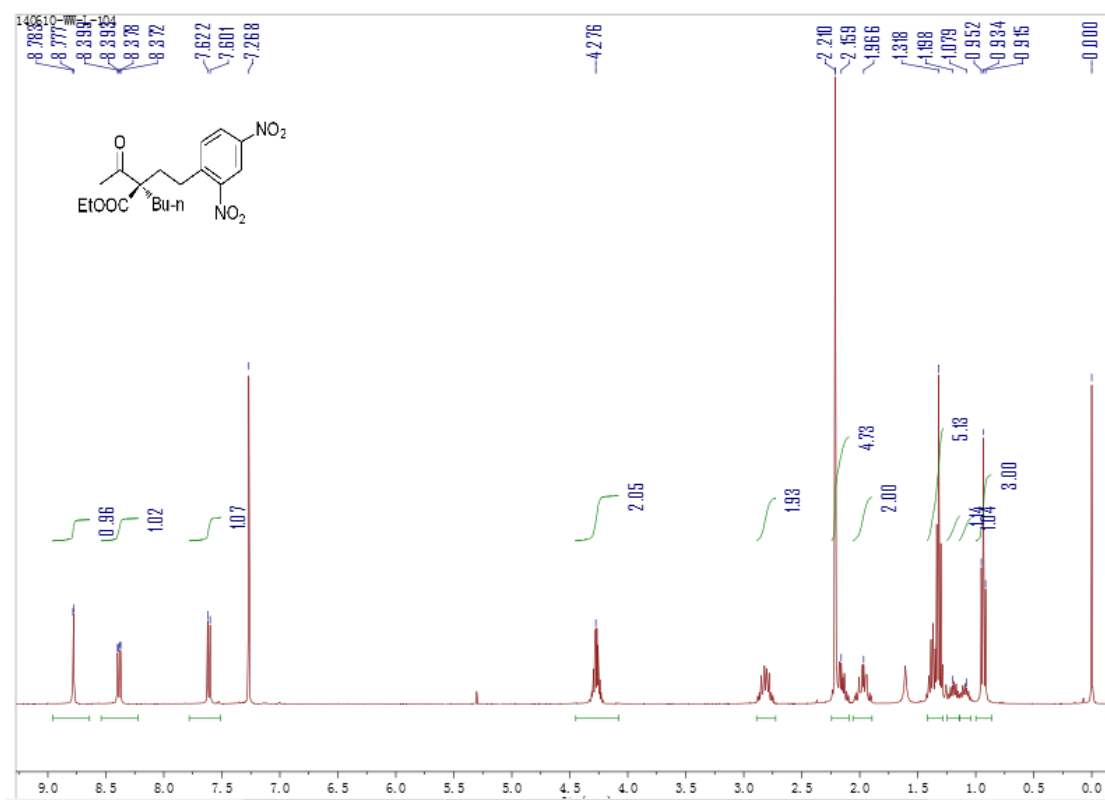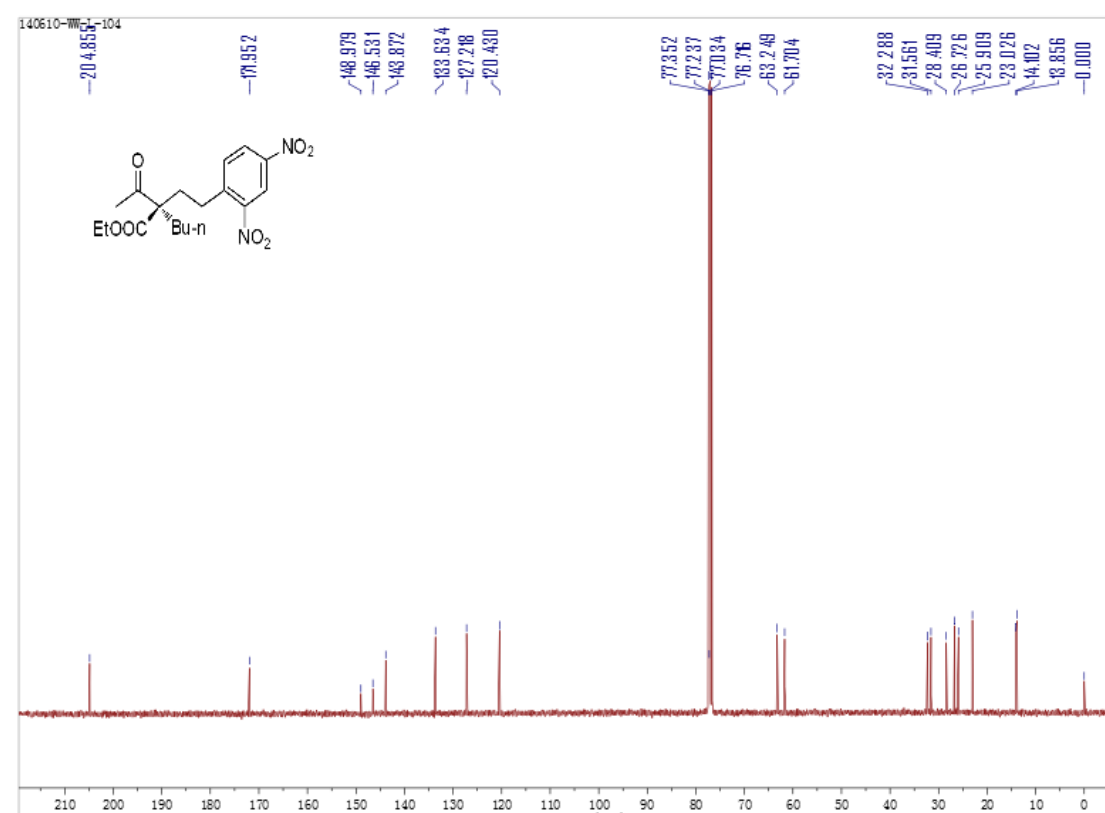

**(R)-Ethyl 2-acetyl-2-(2,4-dinitrophenethyl)heptanoate (3g)**

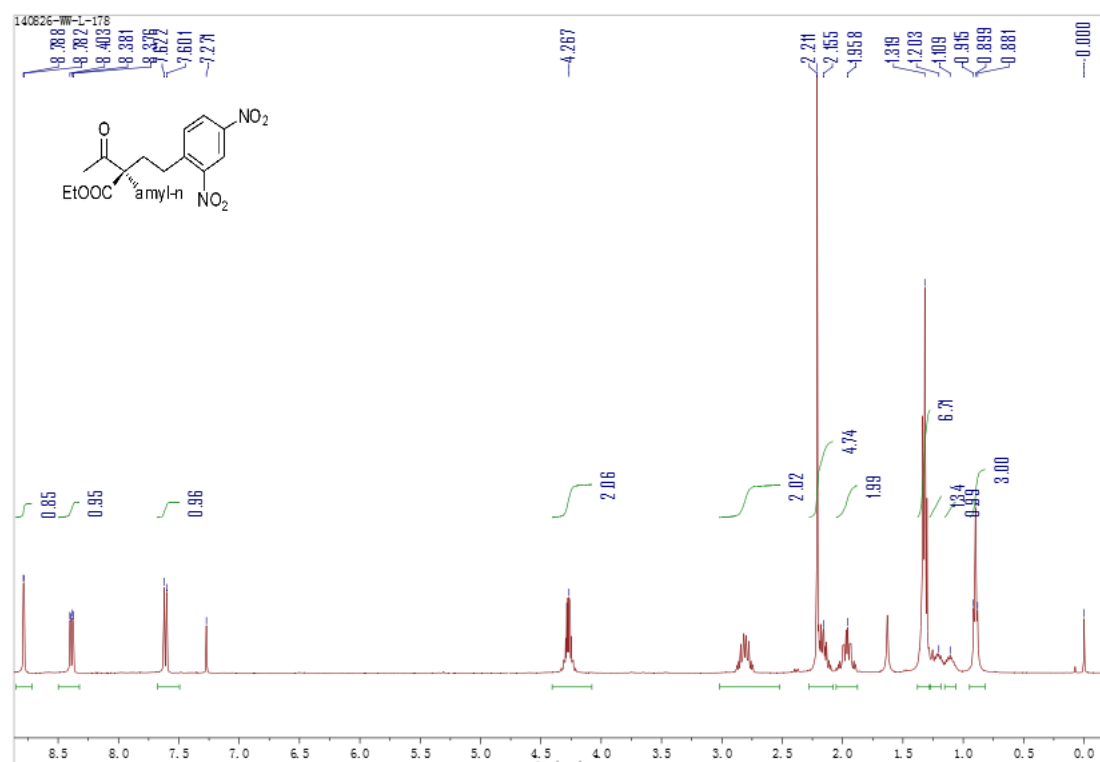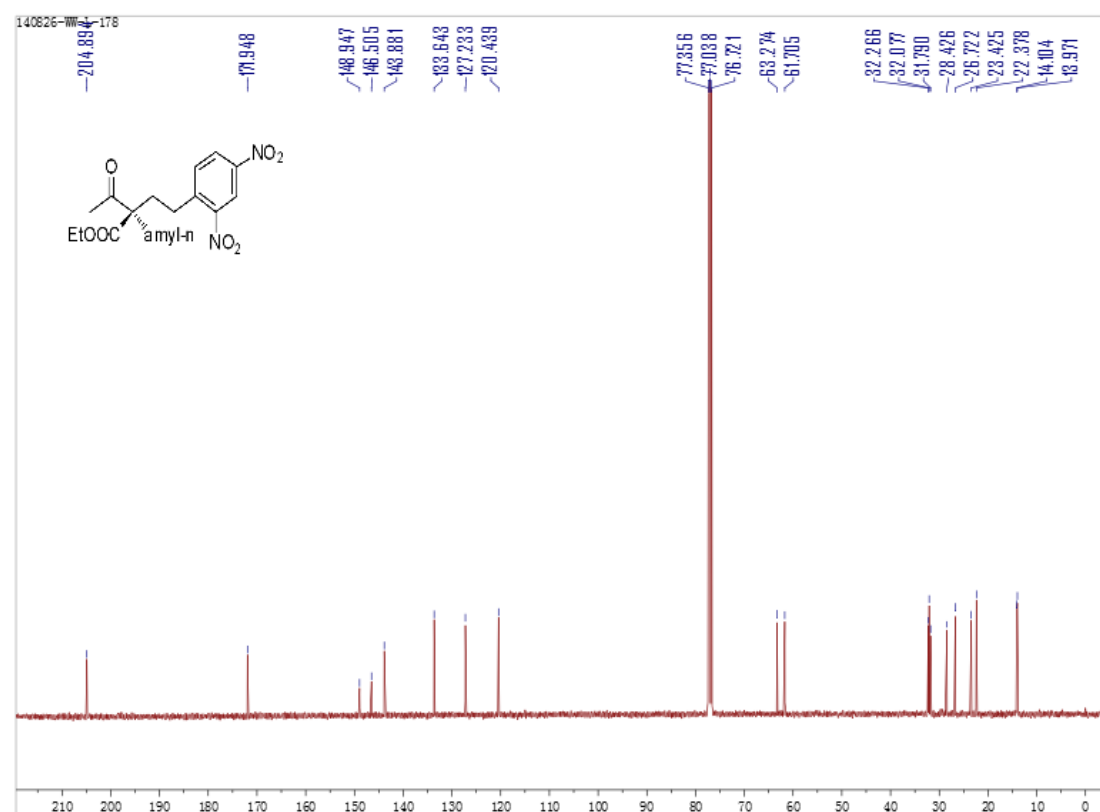

**(R)-Ethyl 2-acetyl-2-(2,4-dinitrophenethyl)octanoate (3h)**

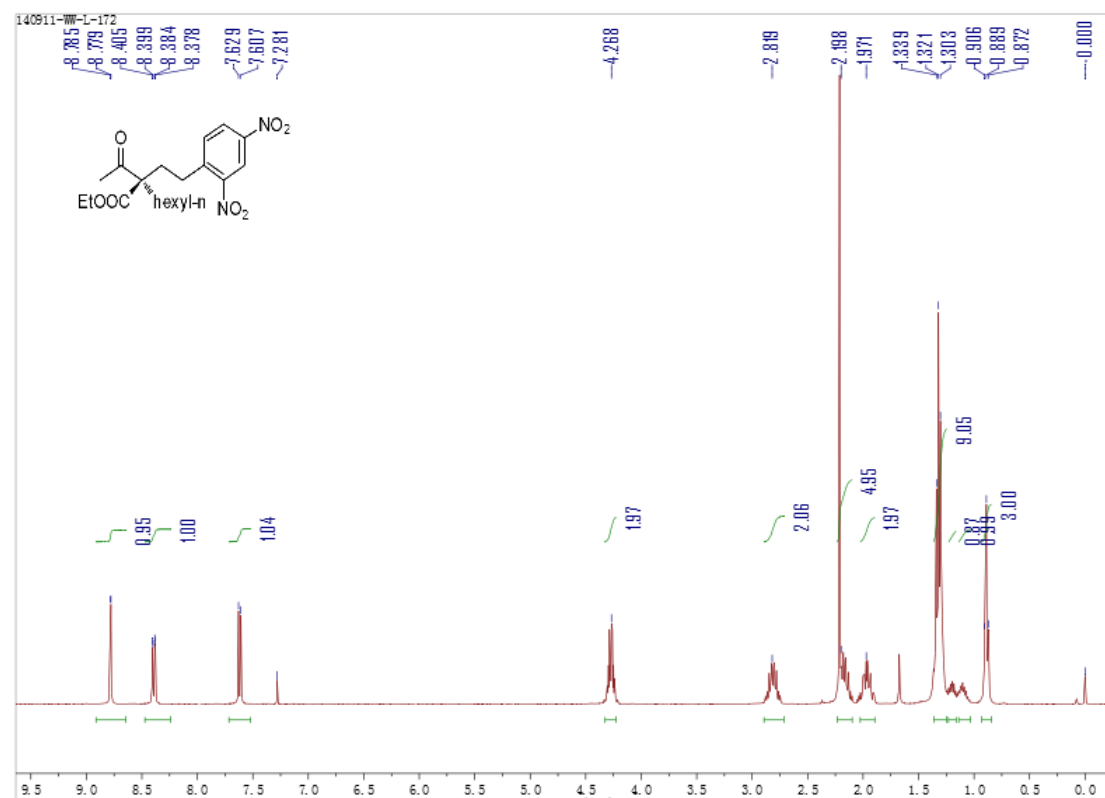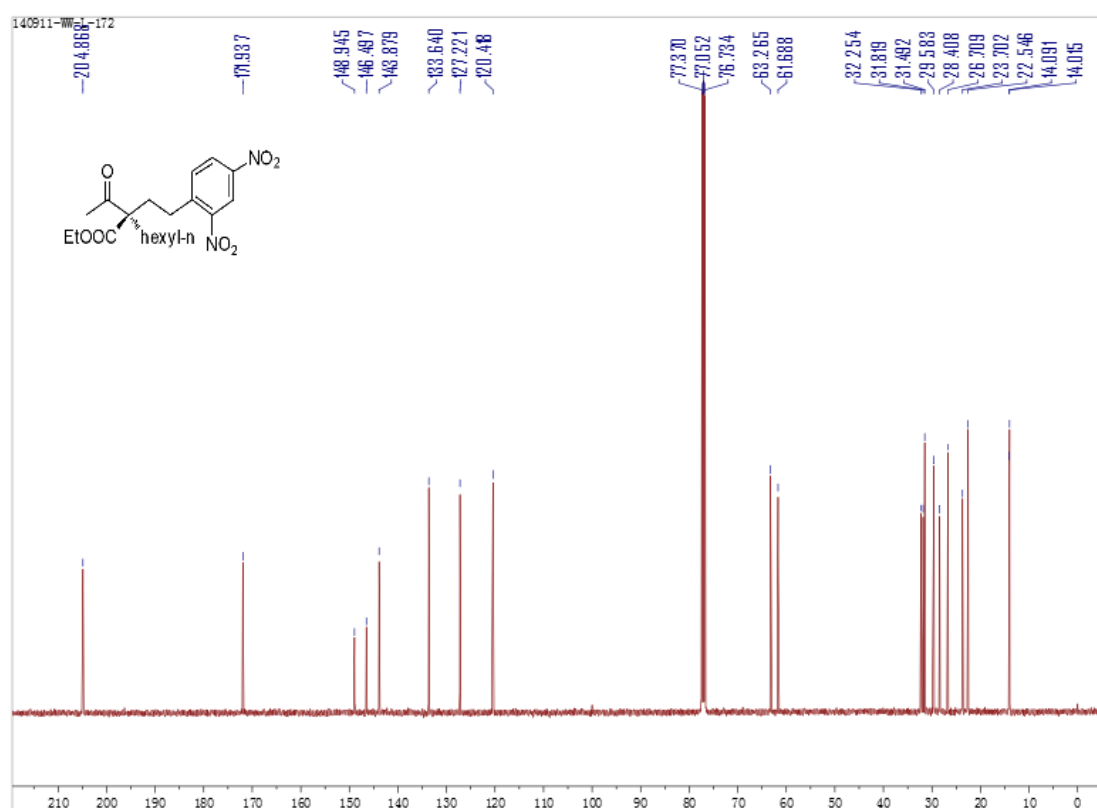

**(R)-Diethyl 2-acetyl-2-(2,4-dinitrophenethyl)pentanedioate (3i)**

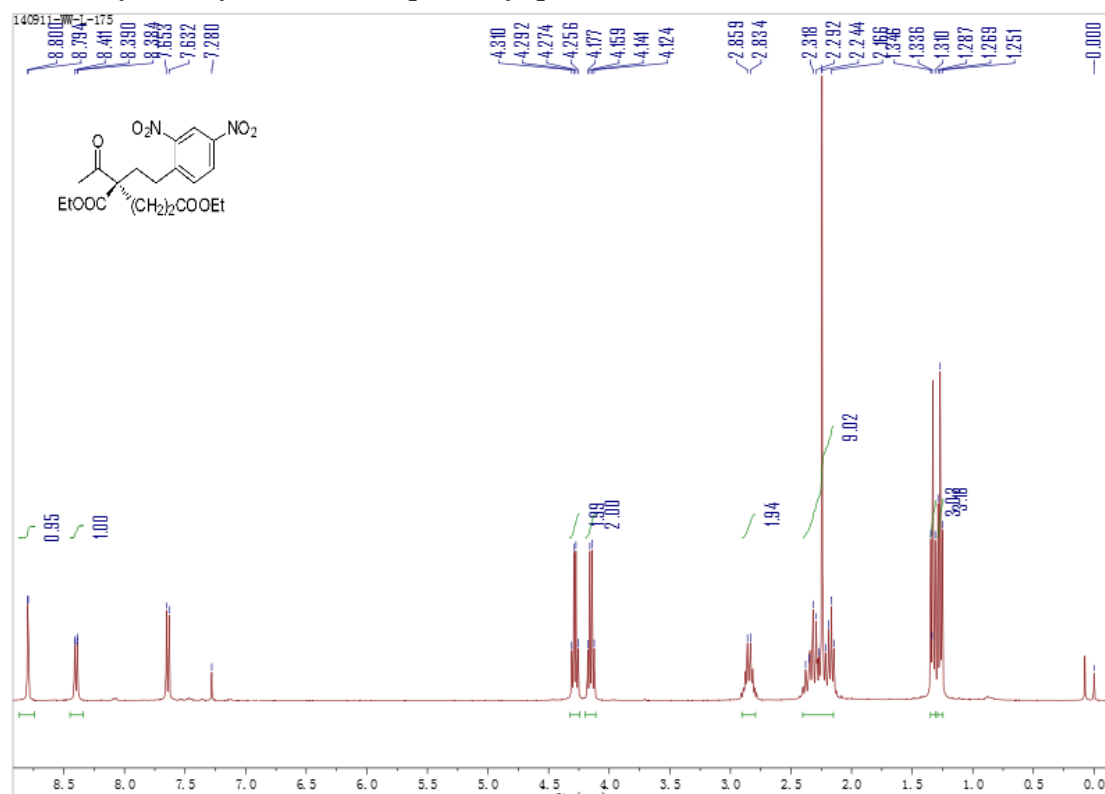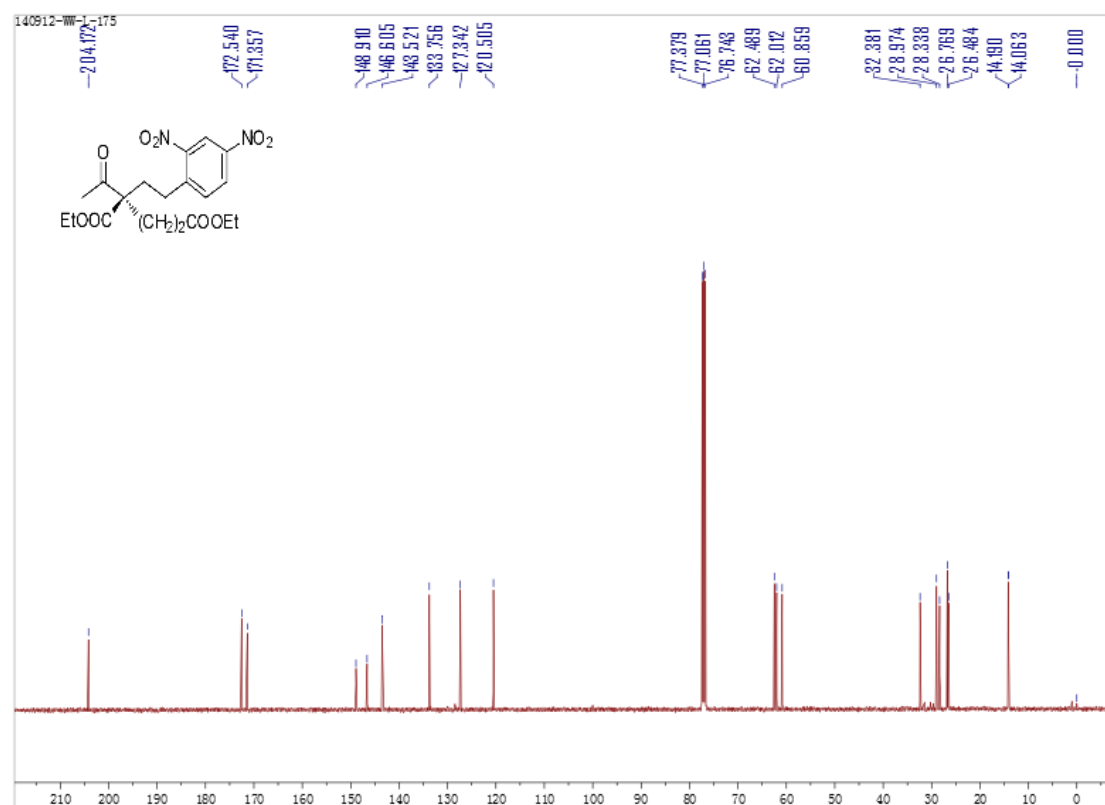

**(R)-Ethyl 2-acetyl-2-methyl-4-(4-nitro-2-(trifluoromethyl)phenyl)butanoate (3j)**

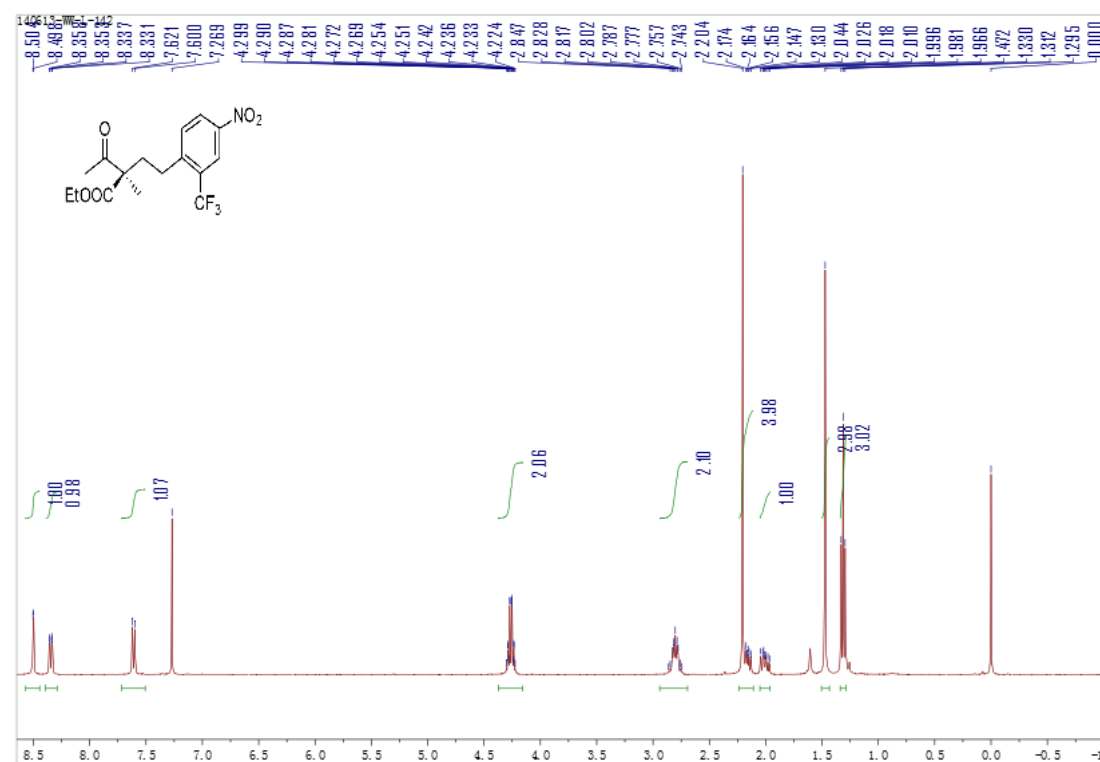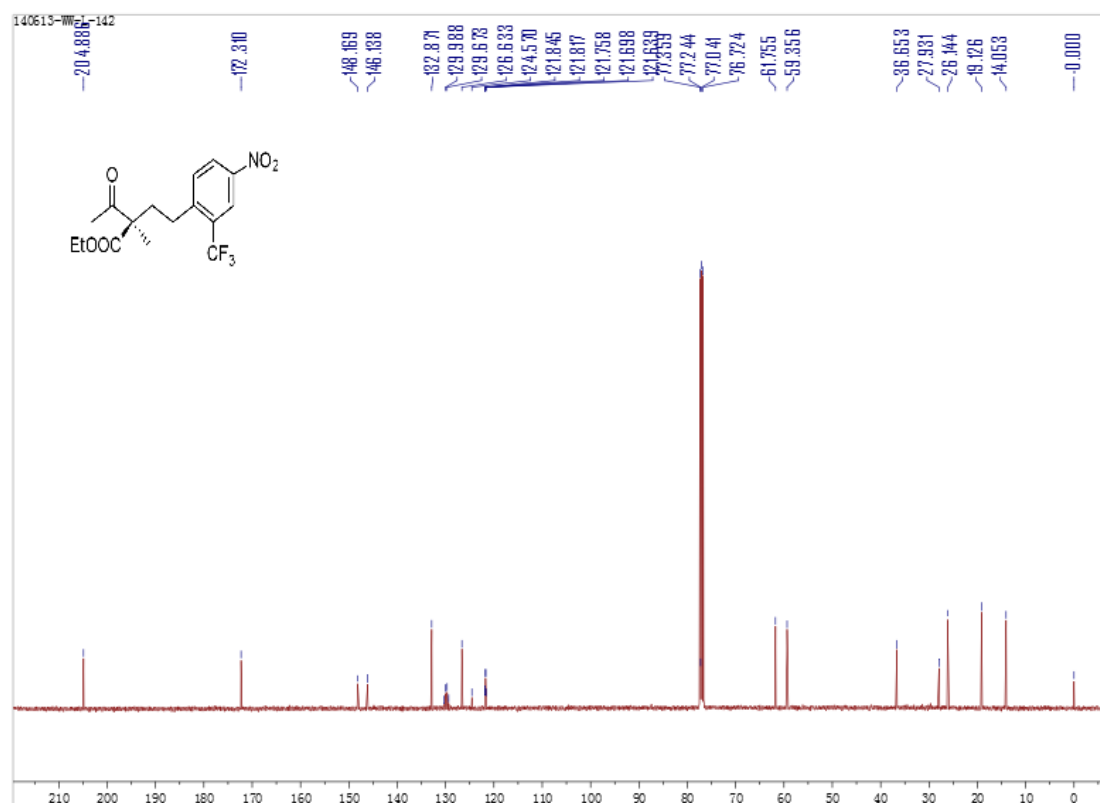



**(R)-Ethyl 1-(2-(5-nitropyridin-2-yl)ethyl)-2-oxocyclohexanecarboxylate (3k)**

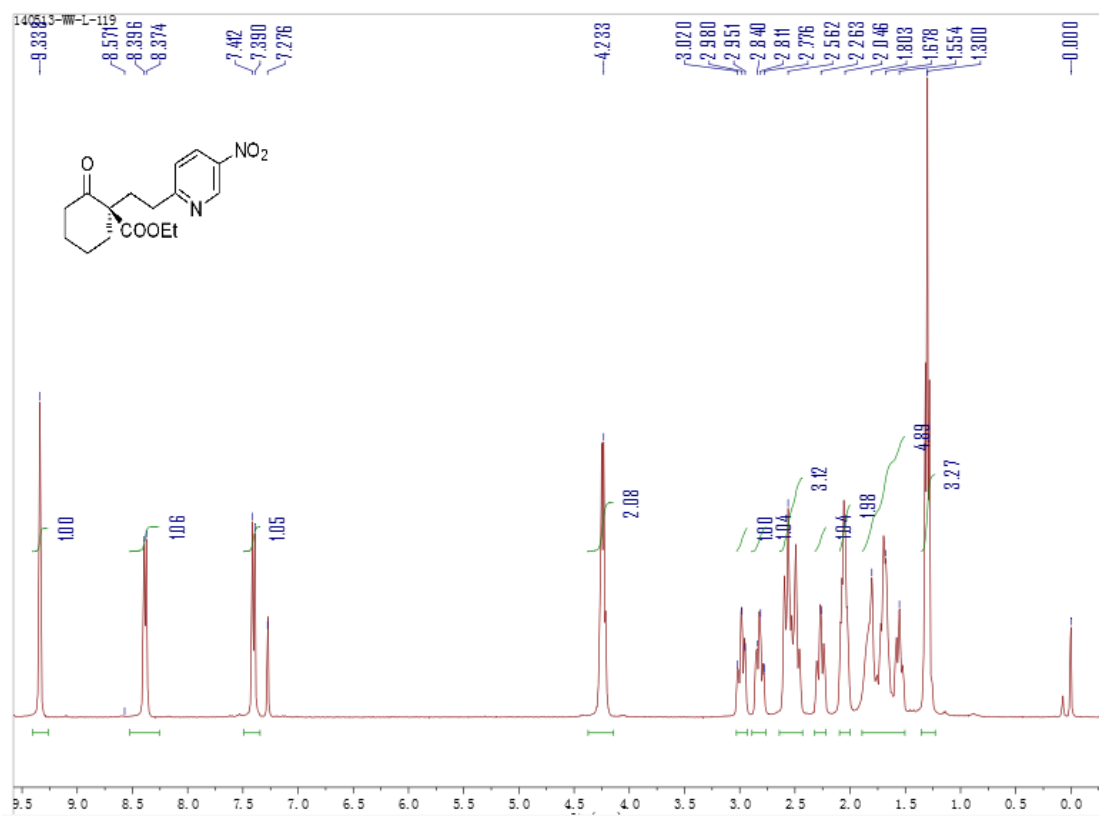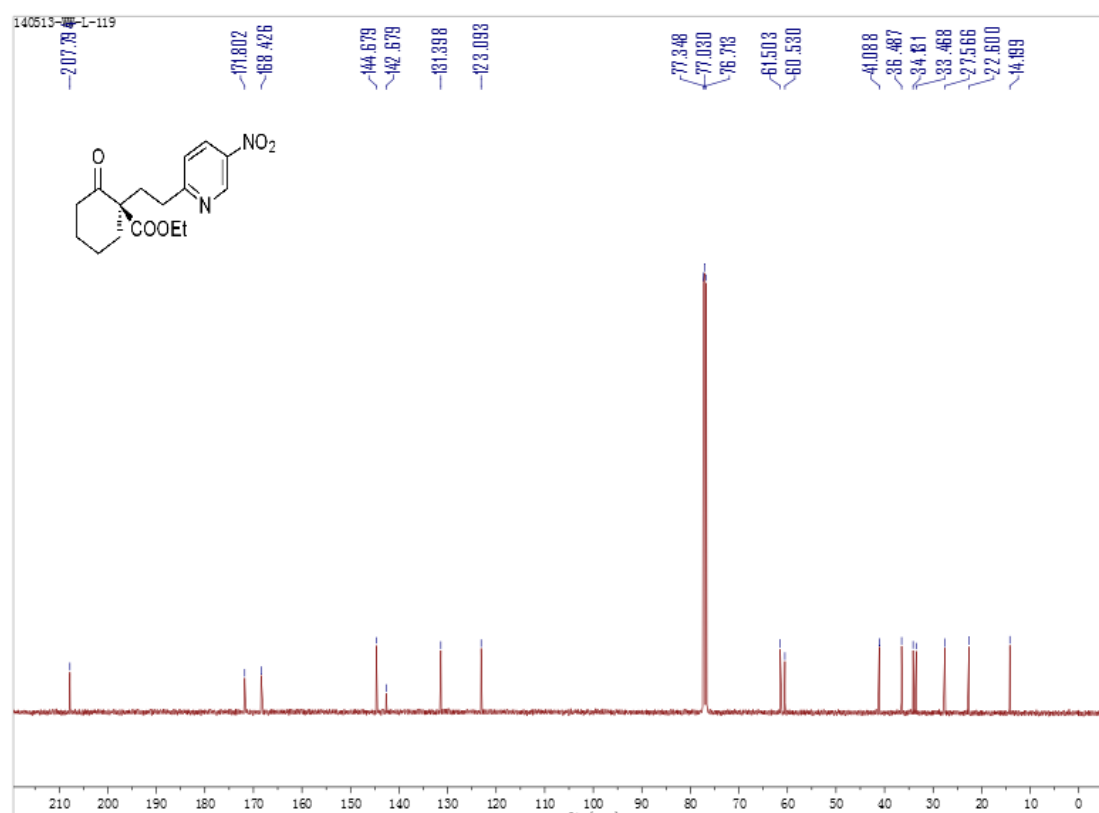

**(R)-Ethyl 1-(4-(methylsulfonyl)-2-nitrophenethyl)-2-oxocyclohexanecarboxylate (3I)**

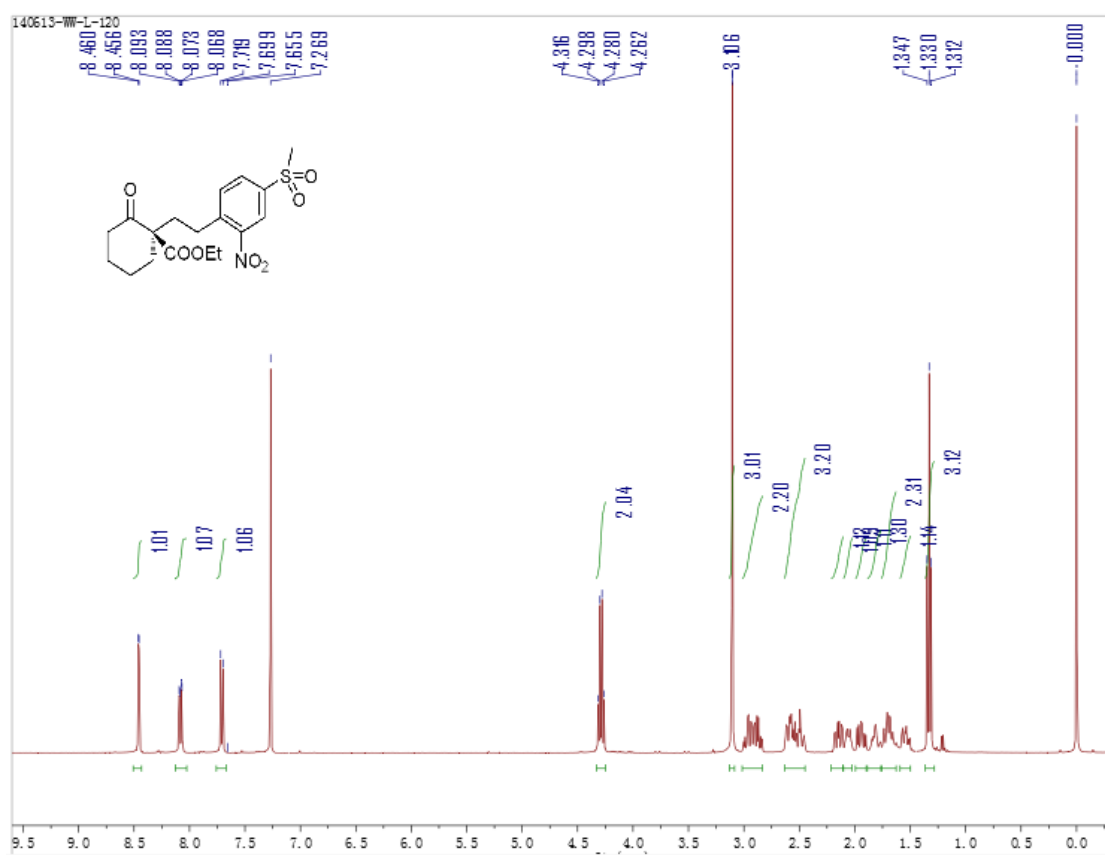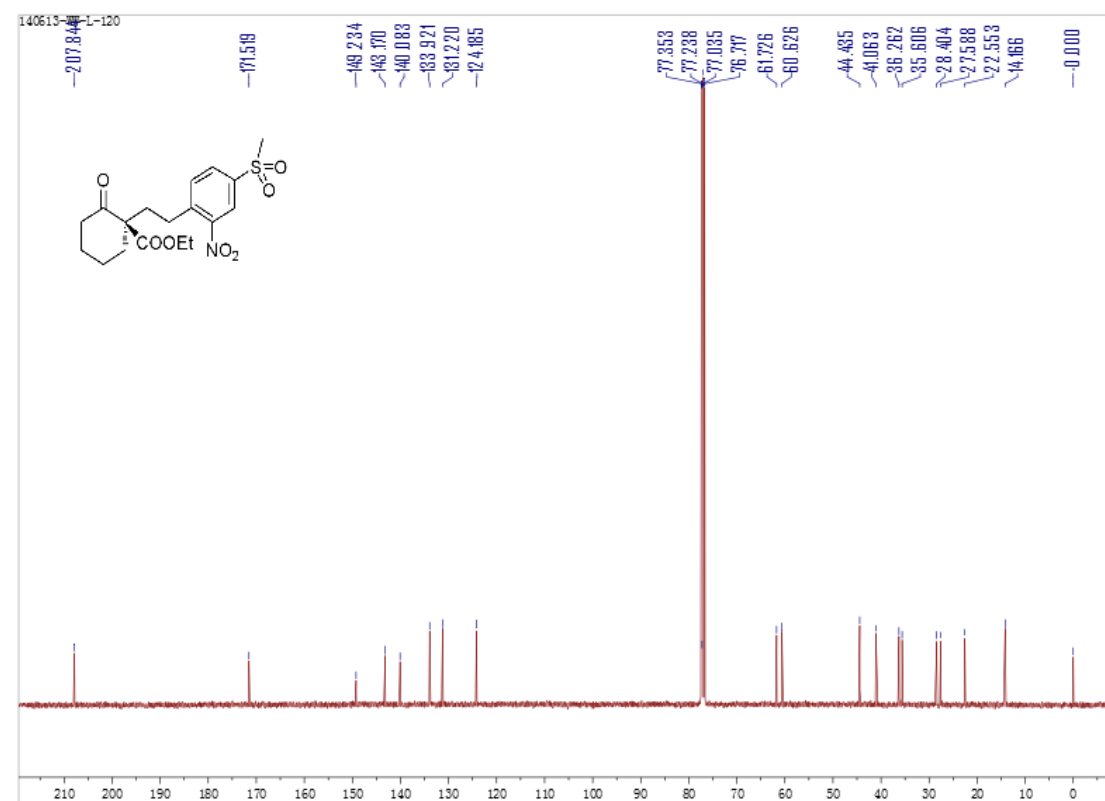

**(R)-3a-(2,4-Dinitrophenethyl)-2-phenyl-4,5,6,7-tetrahydro-2H-indazol-3(3aH)-one (5a)**

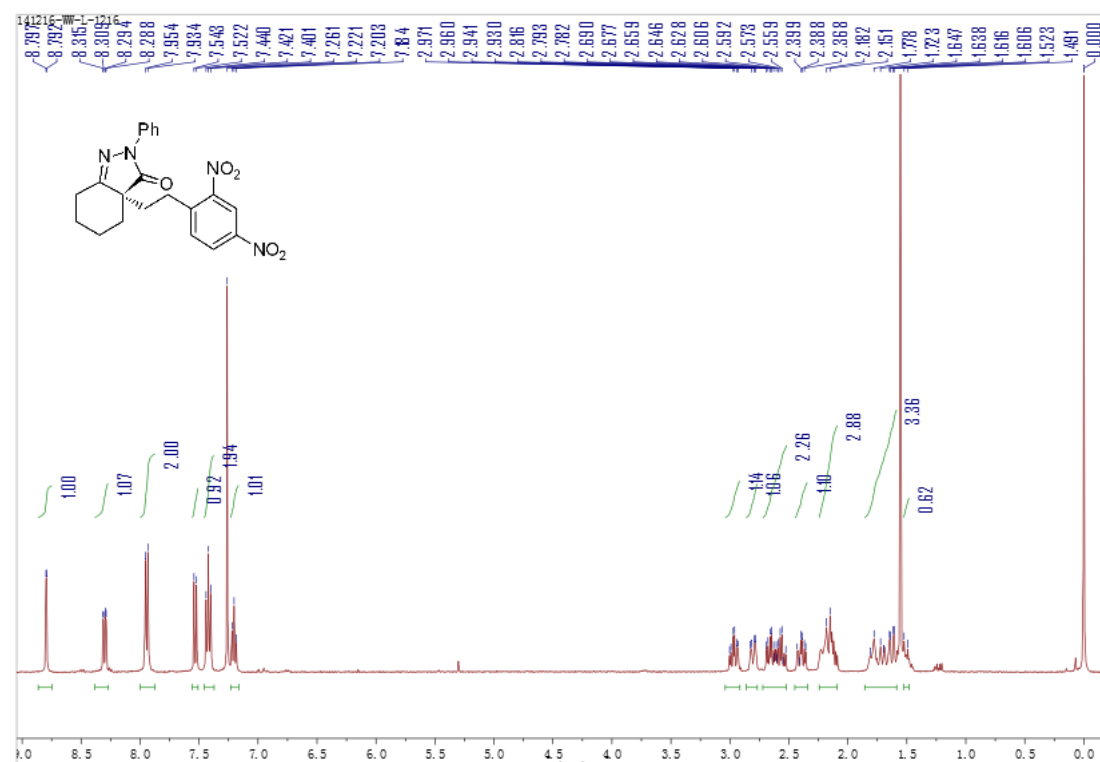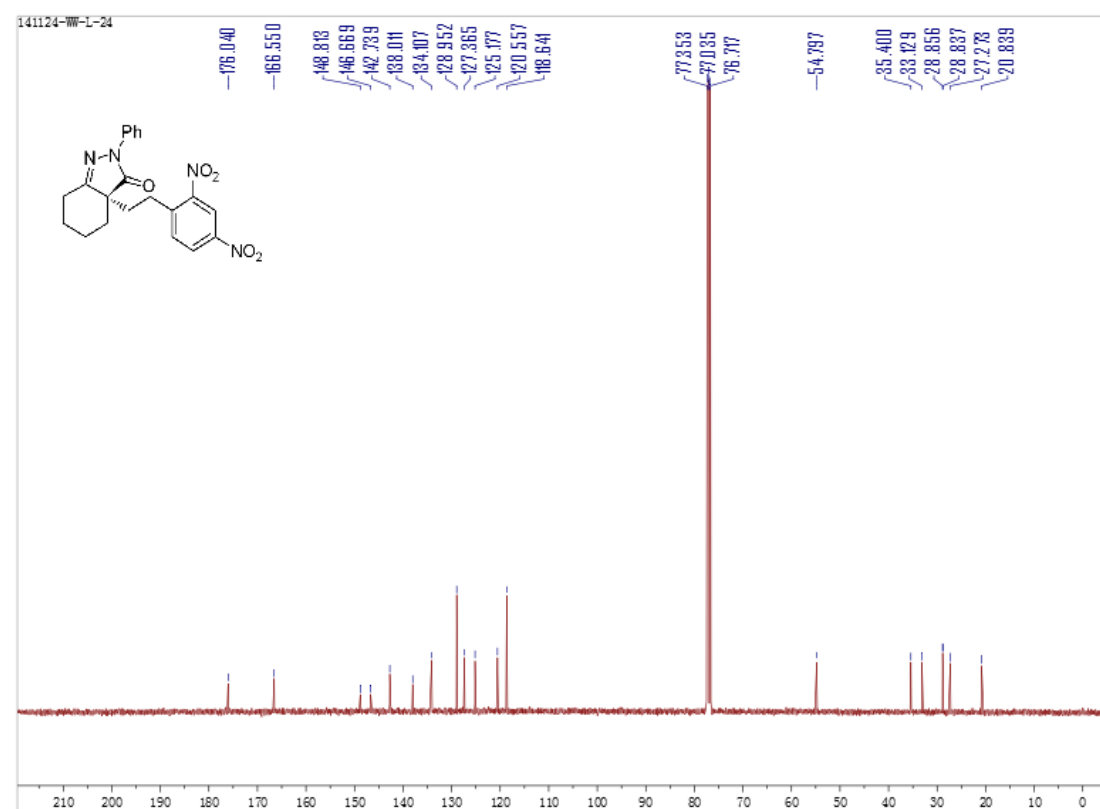

**(R)-4-(2,4-Dinitrophenethyl)-3,4-dimethyl-1-phenyl-1H-pyrazol-5(4H)-one (5d)**

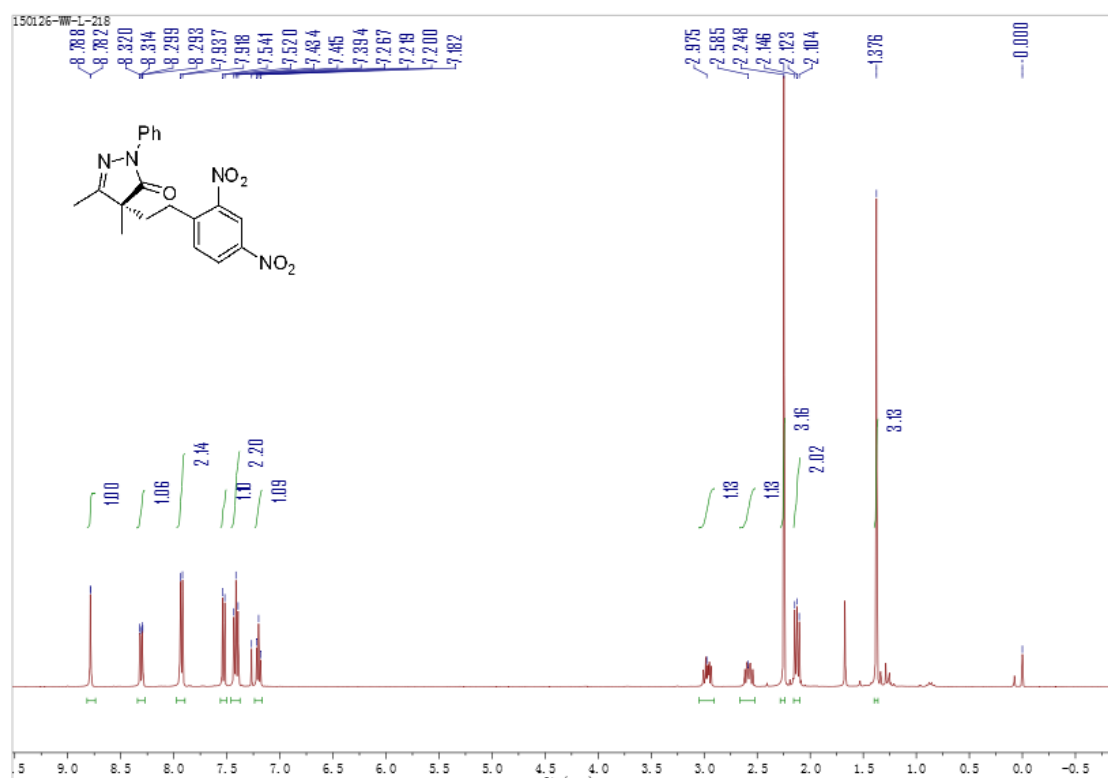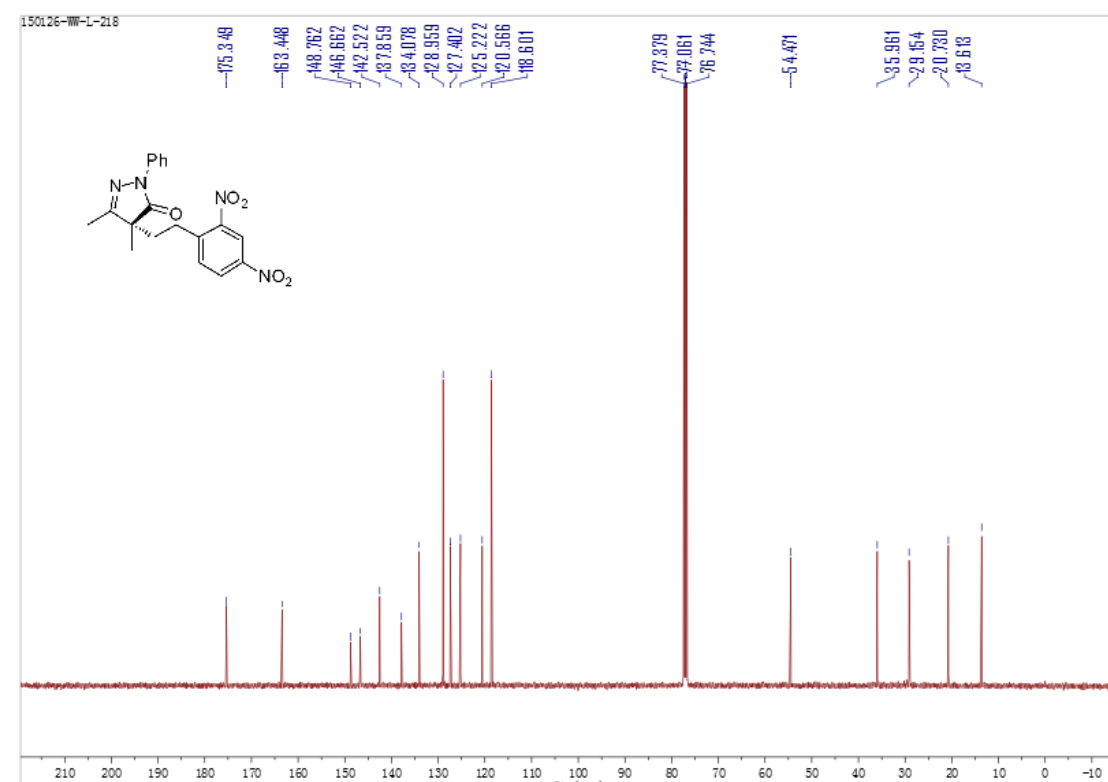

## 9. Chiral HPLC analysis spectra

### <Chromatogram>

mAU

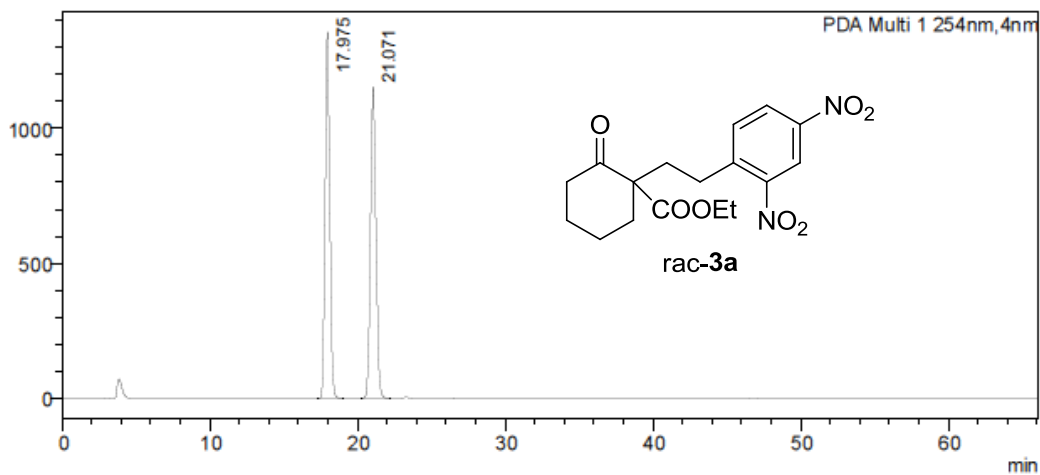

### <Peak Table>

PDA Ch1 254nm

| Peak# | Ret. Time | Area     | Height  | Conc.  | Unit | Mark | Name      |
|-------|-----------|----------|---------|--------|------|------|-----------|
| 1     | 17.975    | 29262654 | 1352788 | 50.031 | %    |      | RT:17.975 |
| 2     | 21.071    | 29226919 | 1150531 | 49.969 | %    |      | RT:21.071 |
| Total |           | 58489573 | 2503319 |        |      |      |           |

### <Chromatogram>

mAU

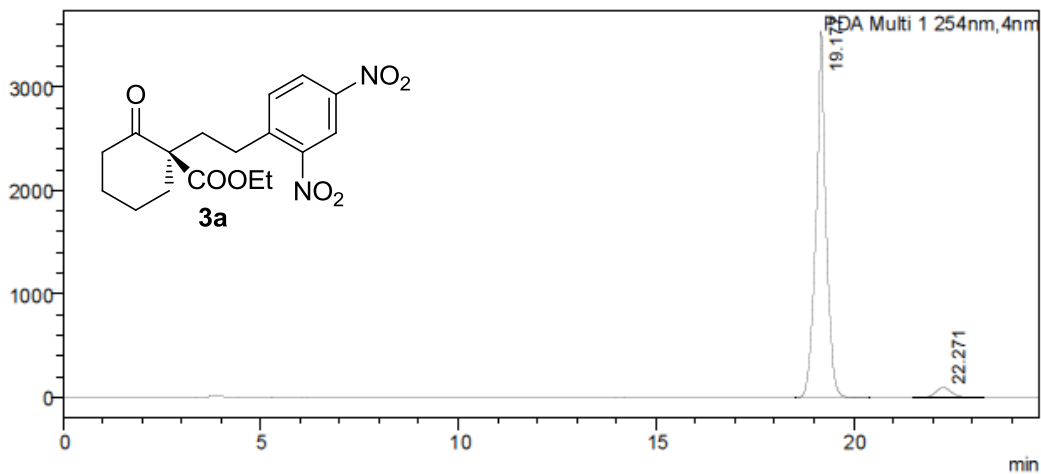

### <Peak Table>

PDA Ch1 254nm

| Peak# | Ret. Time | Area     | Height  | Conc.  | Unit | Mark | Name      |
|-------|-----------|----------|---------|--------|------|------|-----------|
| 1     | 19.177    | 61375078 | 3195339 | 96.042 | %    |      | RT:19.177 |
| 2     | 22.271    | 2529643  | 94422   | 3.958  | %    |      | RT:22.271 |
| Total |           | 63904721 | 3289760 |        |      |      |           |

### <Chromatogram>

mAU

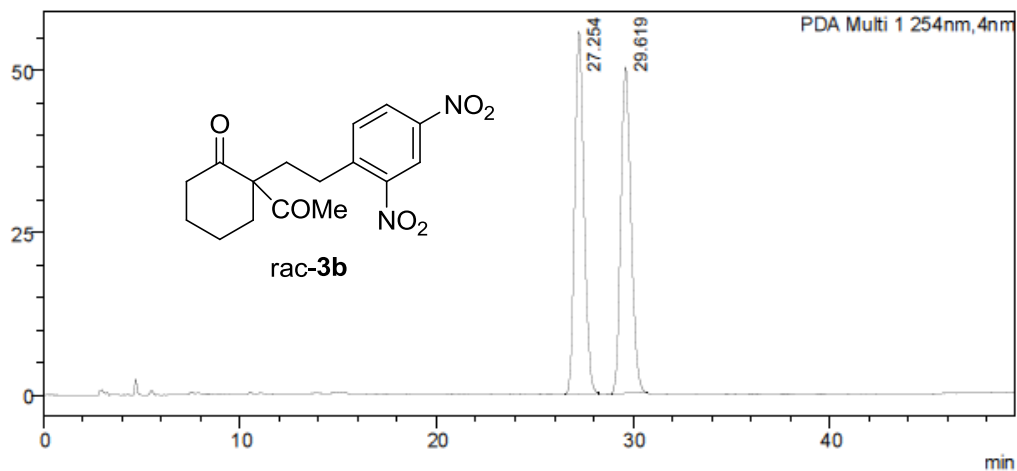

### <Peak Table>

PDA Ch1 254nm

| Peak# | Ret. Time | Area    | Height | Conc.  | Unit | Mark | Name      |
|-------|-----------|---------|--------|--------|------|------|-----------|
| 1     | 27.254    | 1805972 | 55661  | 50.184 | %    |      | RT:27.254 |
| 2     | 29.619    | 1792712 | 50174  | 49.816 | %    |      | RT:29.619 |
| Total |           | 3598684 | 105835 |        |      |      |           |

### <Chromatogram>

mAU

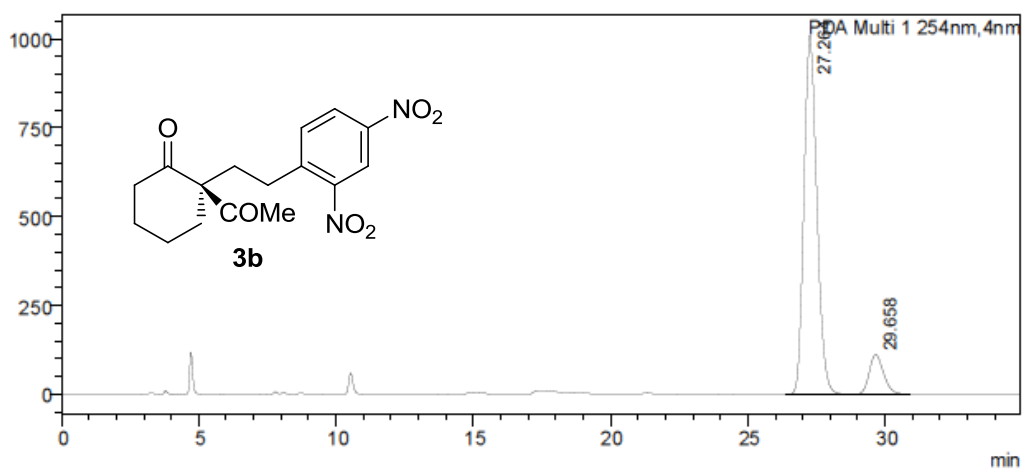

### <Peak Table>

PDA Ch1 254nm

| Peak# | Ret. Time | Area     | Height  | Conc.  | Unit | Mark | Name      |
|-------|-----------|----------|---------|--------|------|------|-----------|
| 1     | 27.264    | 32998144 | 1008523 | 89.217 | %    |      | RT:27.264 |
| 2     | 29.658    | 3988378  | 111043  | 10.783 | %    | V    | RT:29.658 |
| Total |           | 36986521 | 1119566 |        |      |      |           |

### <Chromatogram>

mAU

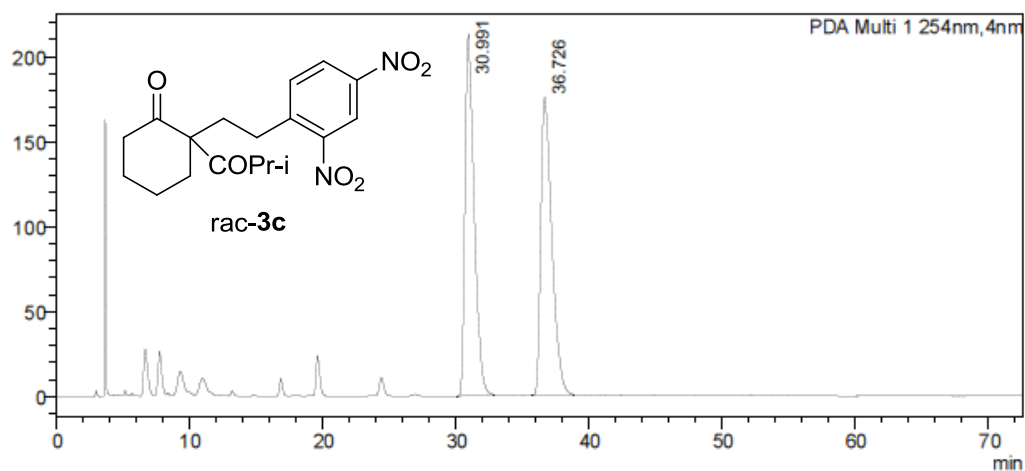

### <Peak Table>

PDA Ch1 254nm

| Peak# | Ret. Time | Area     | Height | Conc.  | Unit | Mark | Name      |
|-------|-----------|----------|--------|--------|------|------|-----------|
| 1     | 30.991    | 10074409 | 212460 | 50.019 | %    |      | RT:30.991 |
| 2     | 36.726    | 10066823 | 175228 | 49.981 | %    |      | RT:36.726 |
| Total |           | 20141232 | 387688 |        |      |      |           |

### <Chromatogram>

mAU

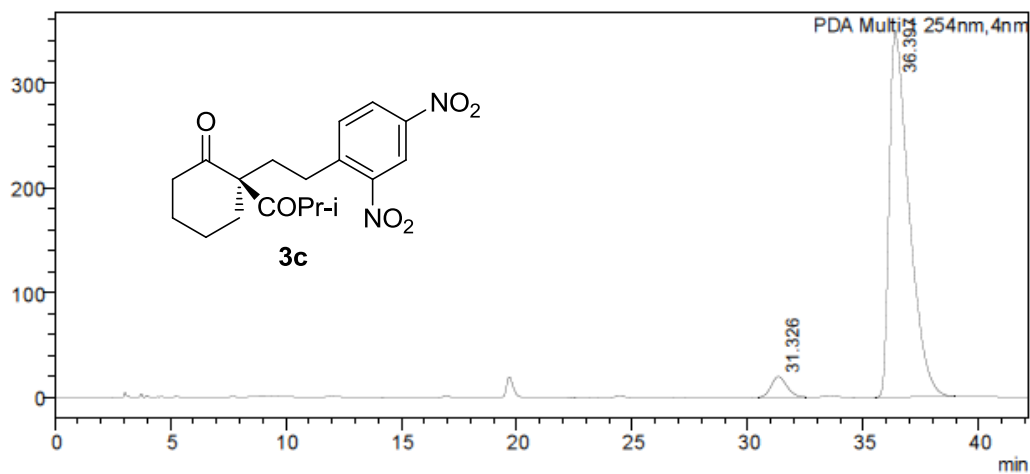

### <Peak Table>

PDA Ch1 254nm

| Peak# | Ret. Time | Area     | Height | Conc.  | Unit | Mark | Name      |
|-------|-----------|----------|--------|--------|------|------|-----------|
| 1     | 31.326    | 908131   | 19562  | 4.182  | %    |      | RT:31.326 |
| 2     | 36.397    | 20804686 | 347031 | 95.818 | %    |      | RT:36.397 |
| Total |           | 21712818 | 366593 |        |      |      |           |

### <Chromatogram>

mAU

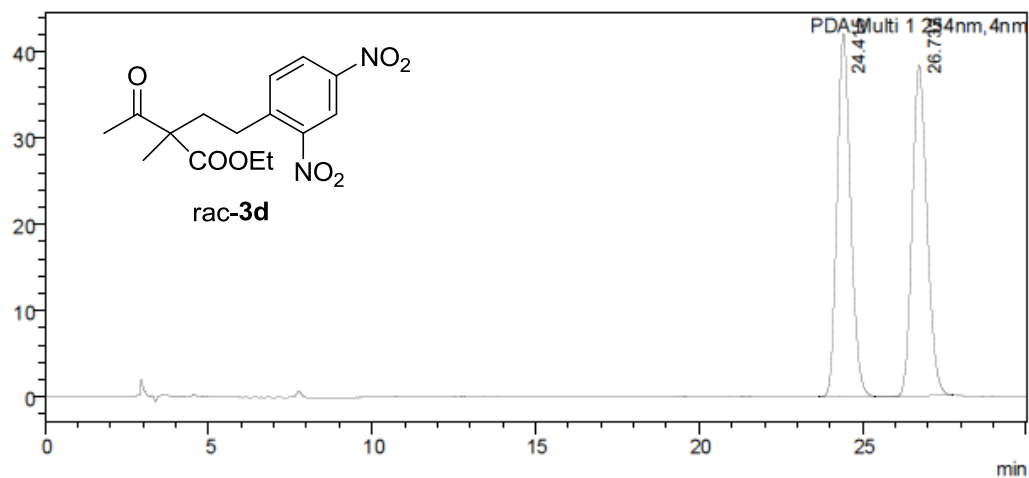

### <Peak Table>

PDA Ch1 254nm

| Peak# | Ret. Time | Area    | Height | Conc.  | Unit | Mark | Name      |
|-------|-----------|---------|--------|--------|------|------|-----------|
| 1     | 24.415    | 1210181 | 41290  | 50.206 | %    |      | RT:24.415 |
| 2     | 26.732    | 1200240 | 37640  | 49.794 | %    | V    | RT:26.732 |
| Total |           | 2410421 | 78930  |        |      |      |           |

### <Chromatogram>

mAU

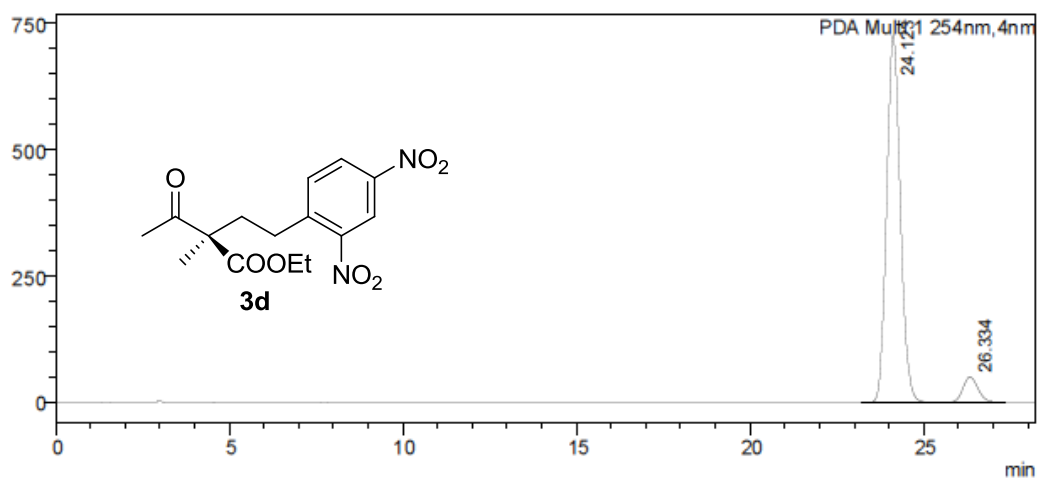

### <Peak Table>

PDA Ch1 254nm

| Peak# | Ret. Time | Area     | Height | Conc.  | Unit | Mark | Name      |
|-------|-----------|----------|--------|--------|------|------|-----------|
| 1     | 24.123    | 19911807 | 706685 | 92.931 | %    |      | RT:24.123 |
| 2     | 26.334    | 1514690  | 50382  | 7.069  | %    | V    | RT:26.334 |
| Total |           | 21426497 | 757067 |        |      |      |           |



<Chromatogram>

mAU

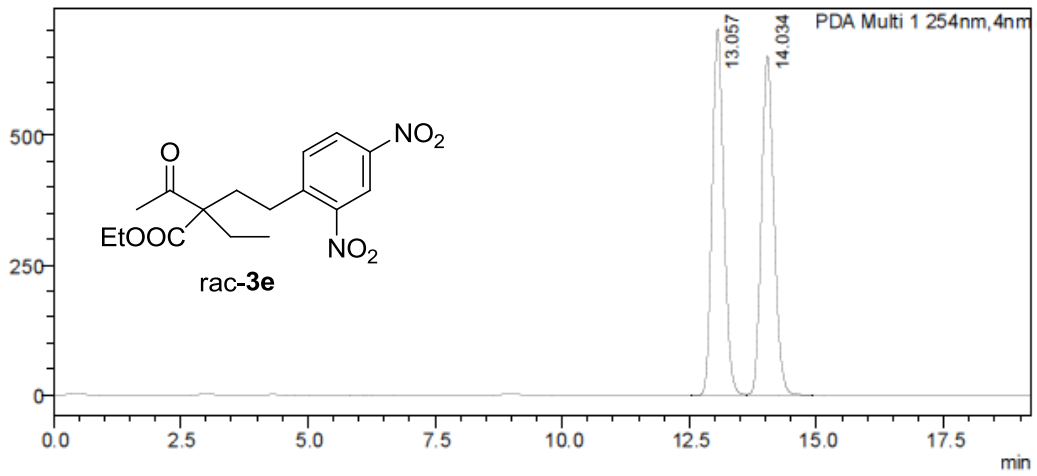

<Peak Table>

PDA Ch1 254nm

| Peak# | Ret. Time | Area     | Height  | Conc.  | Unit | Mark | Name      |
|-------|-----------|----------|---------|--------|------|------|-----------|
| 1     | 13.057    | 11161589 | 697283  | 50.100 | %    |      | RT:13.057 |
| 2     | 14.034    | 11116985 | 649991  | 49.900 | %    | V    | RT:14.034 |
| Total |           | 22278574 | 1347275 |        |      |      |           |

<Chromatogram>

mAU

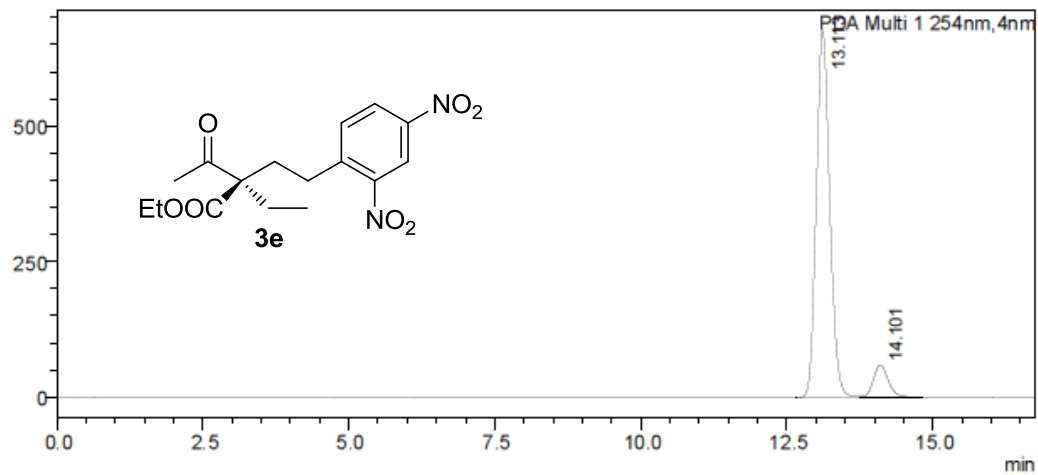

<Peak Table>

PDA Ch1 254nm

| Peak# | Ret. Time | Area     | Height | Conc.  | Unit | Mark | Name      |
|-------|-----------|----------|--------|--------|------|------|-----------|
| 1     | 13.113    | 10745079 | 673354 | 91.133 | %    |      | RT:13.113 |
| 2     | 14.101    | 1045505  | 59286  | 8.867  | %    | V    | RT:14.101 |
| Total |           | 11790583 | 732641 |        |      |      |           |

### <Chromatogram>

mAU

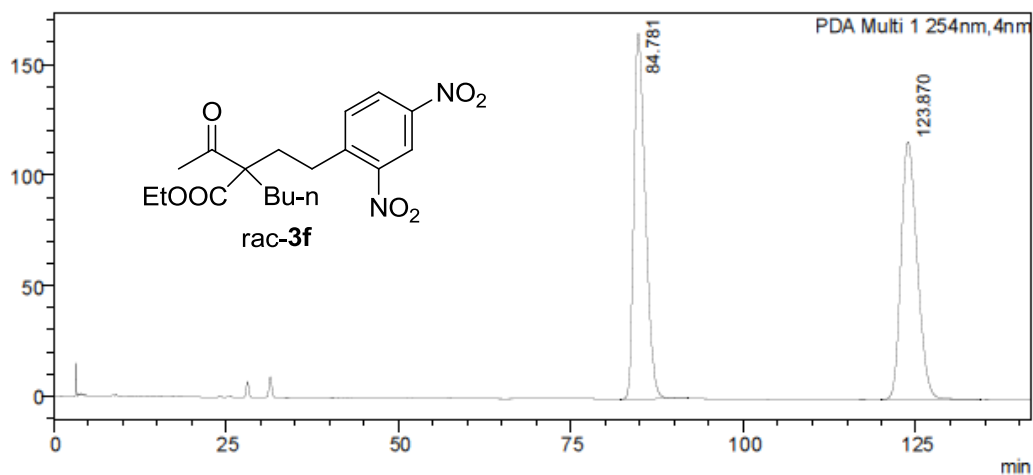

### <Peak Table>

PDA Ch1 254nm

| Peak# | Ret. Time | Area     | Height | Conc.  | Unit | Mark | Name       |
|-------|-----------|----------|--------|--------|------|------|------------|
| 1     | 84.781    | 18945696 | 165241 | 50.010 | %    | S    | RT:84.781  |
| 2     | 123.870   | 18938449 | 116341 | 49.990 | %    | S    | RT:123.870 |
| Total |           | 37884145 | 281582 |        |      |      |            |

### <Chromatogram>

mAU

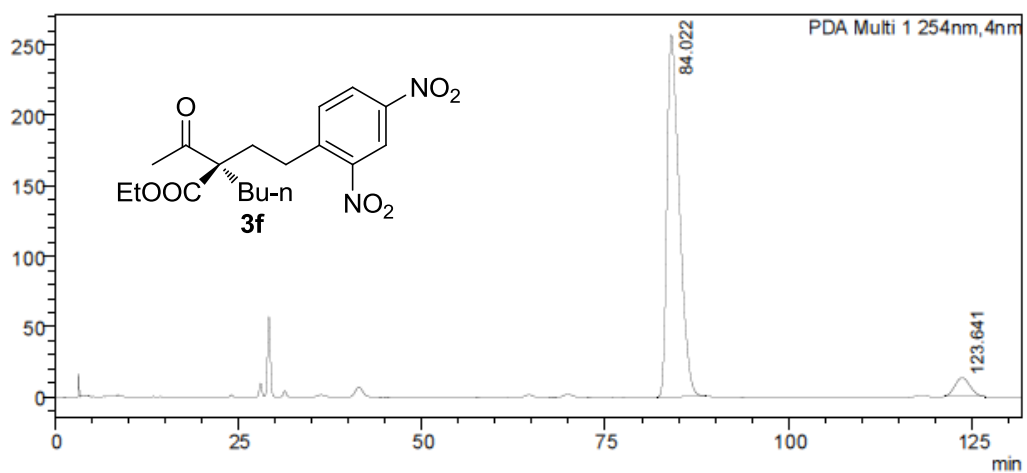

### <Peak Table>

PDA Ch1 254nm

| Peak# | Ret. Time | Area     | Height | Conc.  | Unit | Mark | Name       |
|-------|-----------|----------|--------|--------|------|------|------------|
| 1     | 84.022    | 29871750 | 256901 | 93.976 | %    |      | RT:84.022  |
| 2     | 123.641   | 1914706  | 13261  | 6.024  | %    |      | RT:123.641 |
| Total |           | 31786456 | 270161 |        |      |      |            |

### <Chromatogram>

mAU

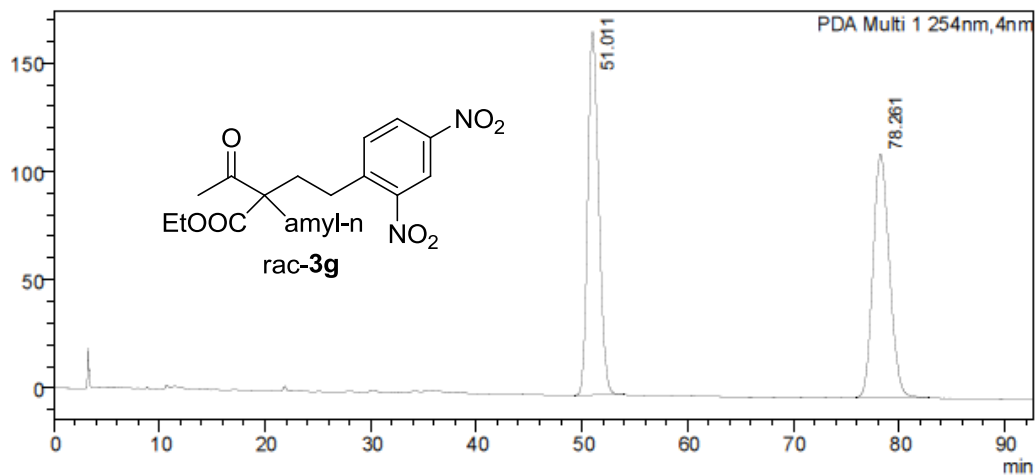

### <Peak Table>

PDA Ch1 254nm

| Peak# | Ret. Time | Area     | Height | Conc.  | Unit | Mark | Name      |
|-------|-----------|----------|--------|--------|------|------|-----------|
| 1     | 51.011    | 12051280 | 167671 | 49.942 | %    |      | RT:51.011 |
| 2     | 78.261    | 12079226 | 112405 | 50.058 | %    |      | RT:78.261 |
| Total |           | 24130506 | 280076 |        |      |      |           |

### <Chromatogram>

mAU

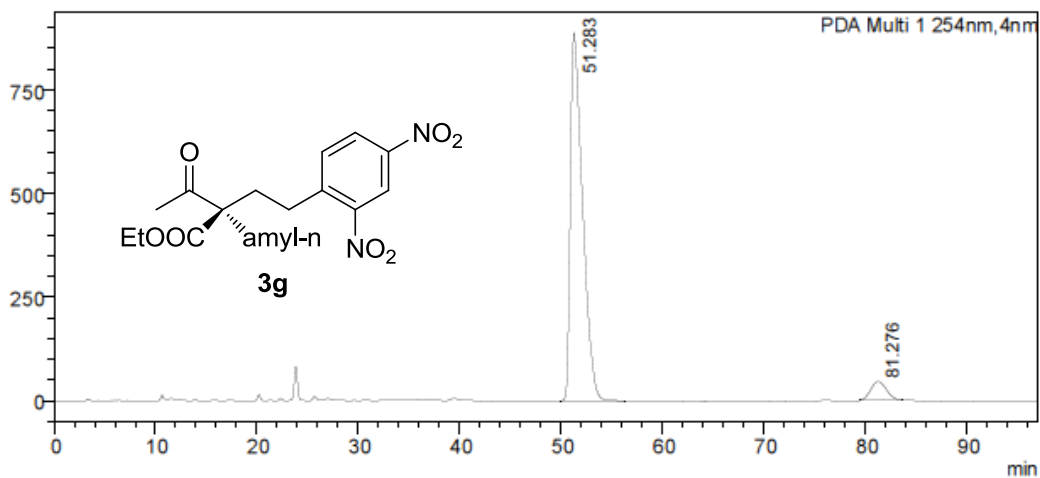

### <Peak Table>

PDA Ch1 254nm

| Peak# | Ret. Time | Area     | Height | Conc.  | Unit | Mark | Name      |
|-------|-----------|----------|--------|--------|------|------|-----------|
| 1     | 51.283    | 73435779 | 887767 | 93.808 | %    |      | RT:51.283 |
| 2     | 81.276    | 4846947  | 45093  | 6.192  | %    |      | RT:81.276 |
| Total |           | 78282726 | 932859 |        |      |      |           |

### <Chromatogram>

mAU

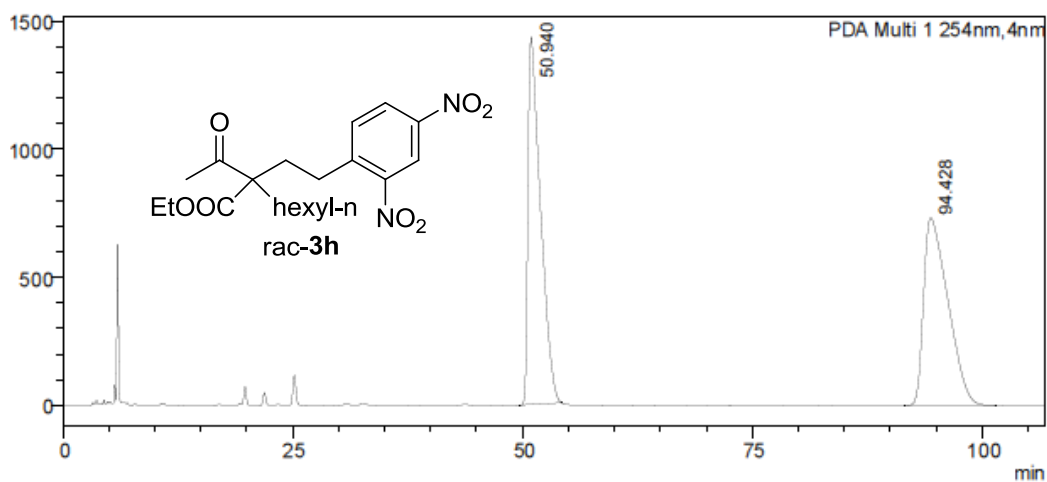

### <Peak Table>

PDA Ch1 254nm

| Peak# | Ret. Time | Area      | Height  | Conc.  | Unit | Mark | Name      |
|-------|-----------|-----------|---------|--------|------|------|-----------|
| 1     | 50.940    | 134543000 | 1434517 | 50.035 | %    |      | RT:50.940 |
| 2     | 94.428    | 134355215 | 732039  | 49.965 | %    |      | RT:94.428 |
| Total |           | 268898215 | 2166556 |        |      |      |           |

### <Chromatogram>

mAU

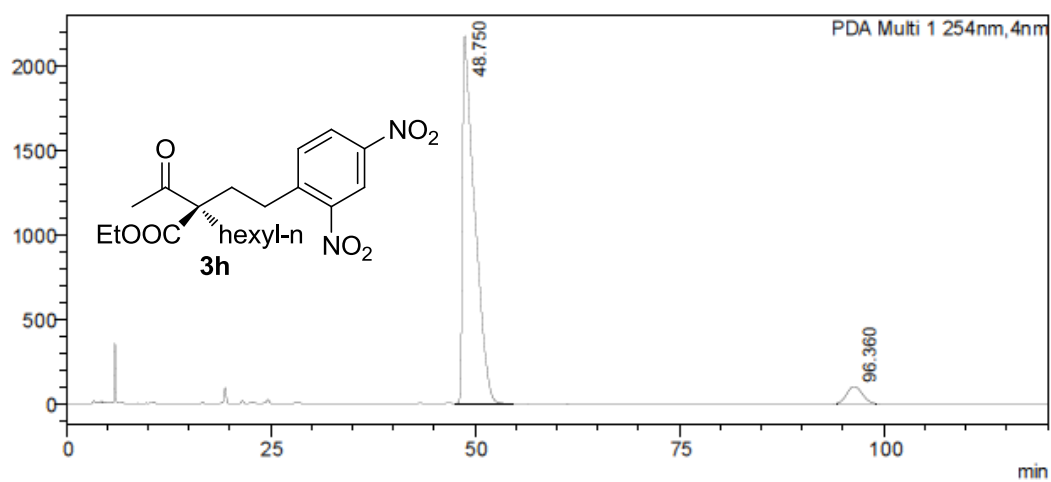

### <Peak Table>

PDA Ch1 254nm

| Peak# | Ret. Time | Area      | Height  | Conc.  | Unit | Mark | Name      |
|-------|-----------|-----------|---------|--------|------|------|-----------|
| 1     | 48.750    | 221396778 | 2176760 | 94.477 | %    |      | RT:48.750 |
| 2     | 96.360    | 12942524  | 100805  | 5.523  | %    |      | RT:96.360 |
| Total |           | 234339302 | 2277565 |        |      |      |           |

### <Chromatogram>

mAU

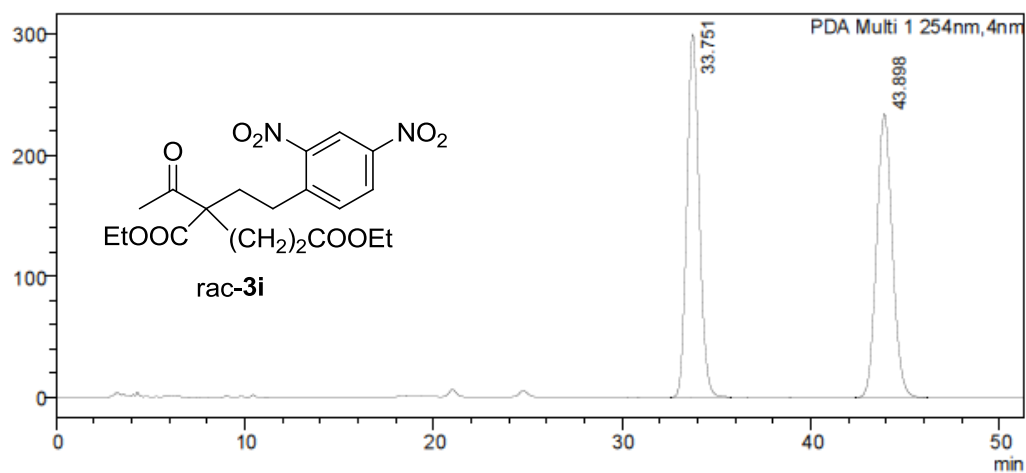

### <Peak Table>

PDA Ch1 254nm

| Peak# | Ret. Time | Area     | Height | Conc.  | Unit | Mark | Name      |
|-------|-----------|----------|--------|--------|------|------|-----------|
| 1     | 33.751    | 13565572 | 299421 | 49.991 | %    |      | RT:33.751 |
| 2     | 43.898    | 13570375 | 233825 | 50.009 | %    |      | RT:43.898 |
| Total |           | 27135946 | 533246 |        |      |      |           |

### <Chromatogram>

mAU

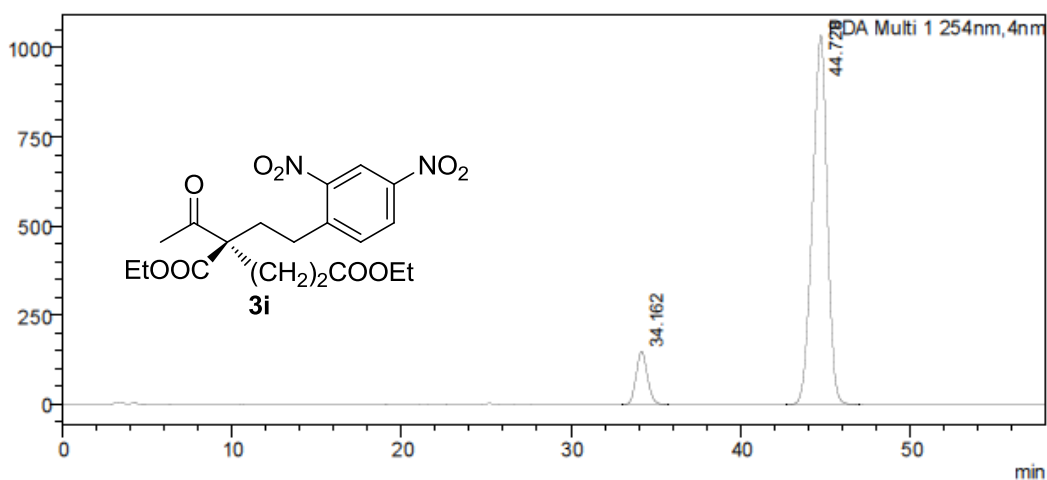

### <Peak Table>

PDA Ch1 254nm

| Peak# | Ret. Time | Area     | Height  | Conc.  | Unit | Mark | Name      |
|-------|-----------|----------|---------|--------|------|------|-----------|
| 1     | 34.162    | 6743040  | 148282  | 9.799  | %    |      | RT:34.162 |
| 2     | 44.728    | 62071145 | 1034309 | 90.201 | %    |      | RT:44.728 |
| Total |           | 68814184 | 1182592 |        |      |      |           |

<Chromatogram>

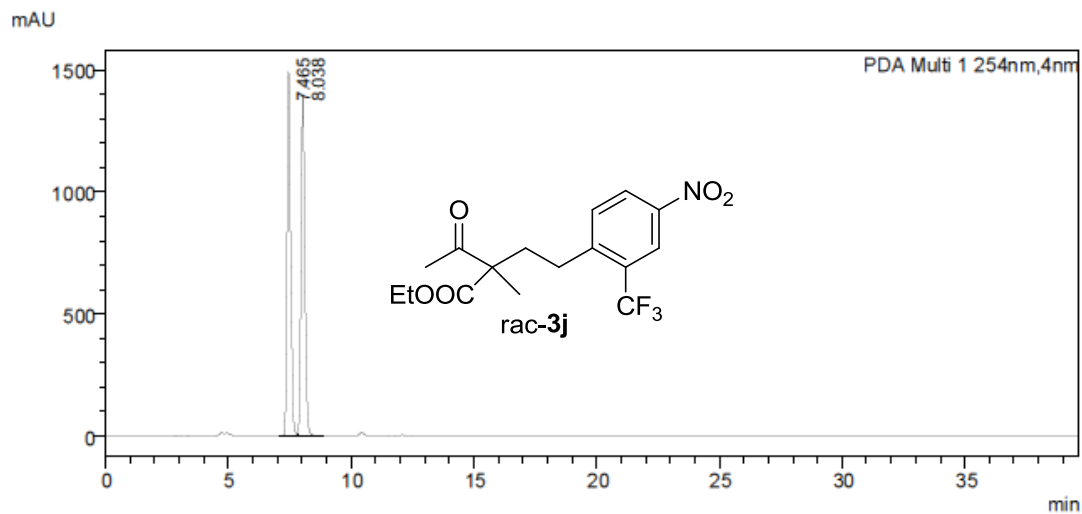

<Peak Table>

PDA Ch1 254nm

| Peak# | Ret. Time | Area     | Height  | Conc.  | Unit | Mark | Name     |
|-------|-----------|----------|---------|--------|------|------|----------|
| 1     | 7.465     | 14791498 | 1450818 | 50.098 | %    |      | RT:7.465 |
| 2     | 8.038     | 14733773 | 1354266 | 49.902 | %    | V    | RT:8.038 |
| Total |           | 29525271 | 2805085 |        |      |      |          |

<Chromatogram>

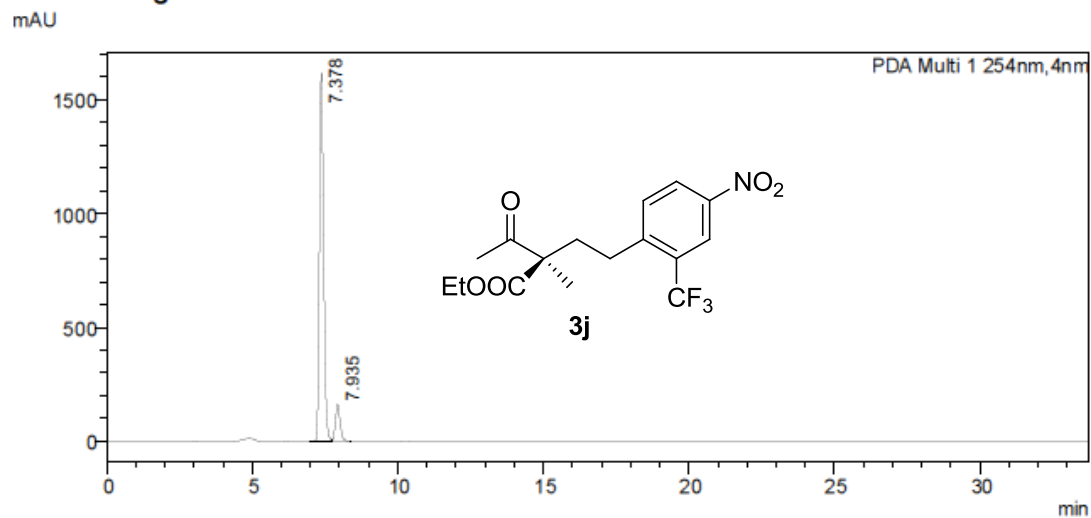

<Peak Table>

PDA Ch1 254nm

| Peak# | Ret. Time | Area     | Height  | Conc.  | Unit | Mark | Name     |
|-------|-----------|----------|---------|--------|------|------|----------|
| 1     | 7.378     | 16205292 | 1599642 | 90.309 | %    |      | RT:7.378 |
| 2     | 7.935     | 1738955  | 158857  | 9.691  | %    | V    | RT:7.935 |
| Total |           | 17944247 | 1758499 |        |      |      |          |

<Chromatogram>

mAU

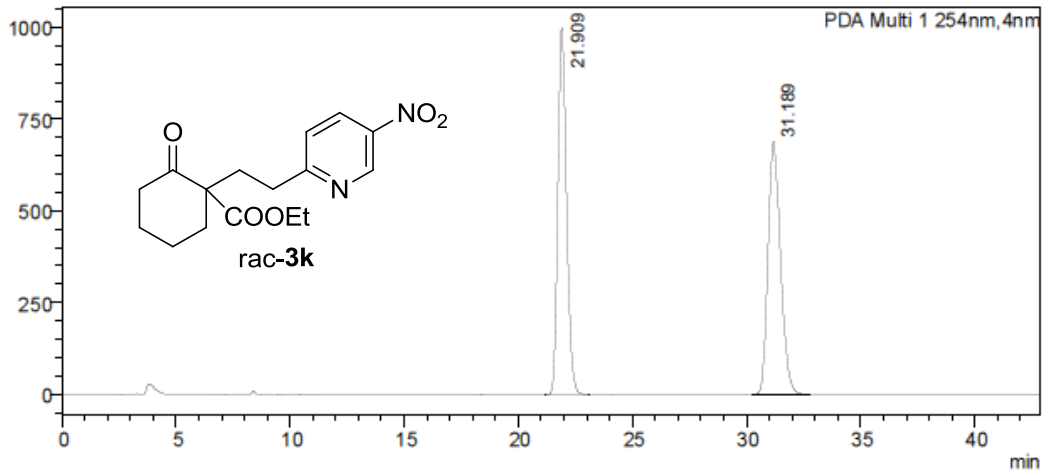

<Peak Table>

PDA Ch1 254nm

| Peak# | Ret. Time | Area     | Height  | Conc.  | Unit | Mark | Name      |
|-------|-----------|----------|---------|--------|------|------|-----------|
| 1     | 21.909    | 26360816 | 997589  | 50.207 | %    |      | RT:21.909 |
| 2     | 31.189    | 26143216 | 688633  | 49.793 | %    |      | RT:31.189 |
| Total |           | 52504033 | 1686222 |        |      |      |           |

<Chromatogram>

mAU

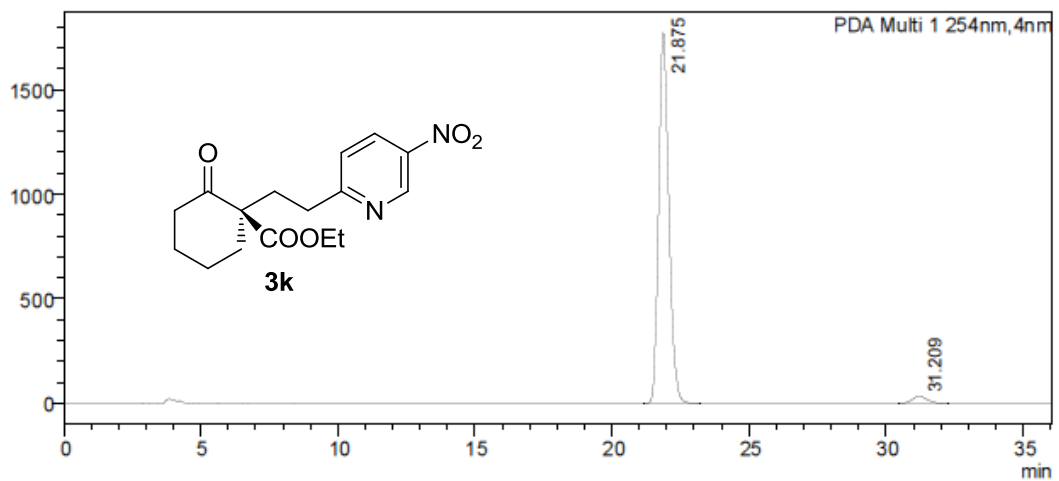

<Peak Table>

PDA Ch1 254nm

| Peak# | Ret. Time | Area     | Height  | Conc.  | Unit | Mark | Name      |
|-------|-----------|----------|---------|--------|------|------|-----------|
| 1     | 21.875    | 45536343 | 1769090 | 97.408 | %    |      | RT:21.875 |
| 2     | 31.209    | 1211892  | 32532   | 2.592  | %    |      | RT:31.209 |
| Total |           | 46748235 | 1801623 |        |      |      |           |

### <Chromatogram>

mAU

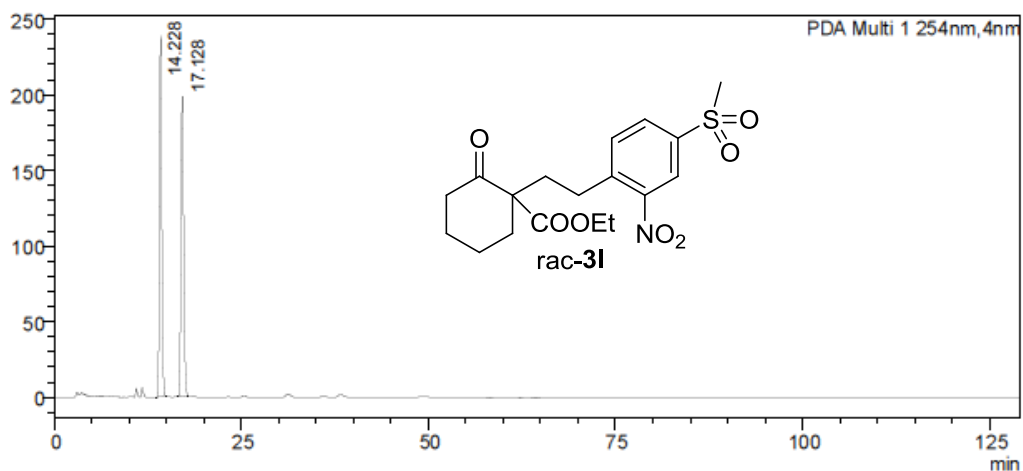

### <Peak Table>

PDA Ch1 254nm

| Peak# | Ret. Time | Area    | Height | Conc.  | Unit | Mark | Name      |
|-------|-----------|---------|--------|--------|------|------|-----------|
| 1     | 14.228    | 4976294 | 238153 | 50.092 | %    |      | RT:14.228 |
| 2     | 17.128    | 4958082 | 197339 | 49.908 | %    |      | RT:17.128 |
| Total |           | 9934376 | 435492 |        |      |      |           |

### <Chromatogram>

mAU

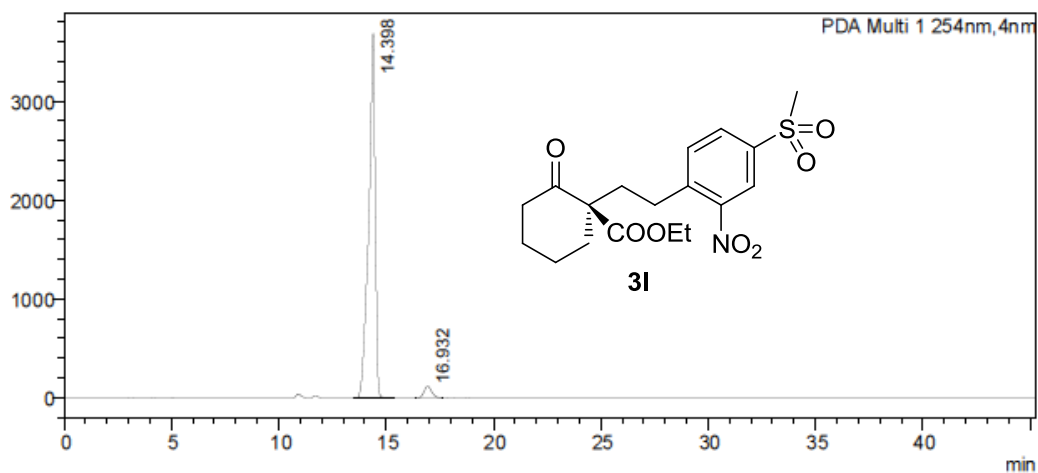

### <Peak Table>

PDA Ch1 254nm

| Peak# | Ret. Time | Area     | Height  | Conc.  | Unit | Mark | Name      |
|-------|-----------|----------|---------|--------|------|------|-----------|
| 1     | 14.398    | 76662201 | 3673878 | 96.477 | %    |      | RT:14.398 |
| 2     | 16.932    | 2799685  | 115770  | 3.523  | %    |      | RT:16.932 |
| Total |           | 79461886 | 3789647 |        |      |      |           |



### <Chromatogram>

mAU

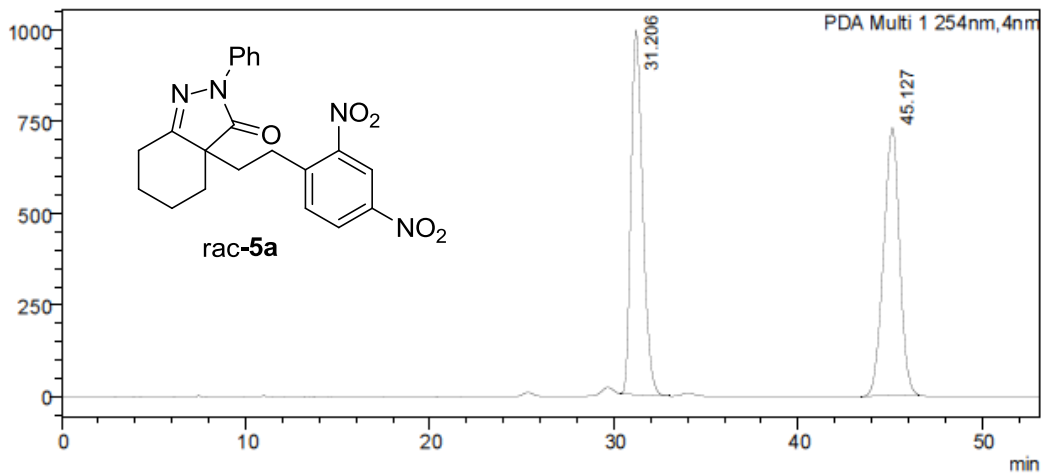

### <Peak Table>

PDA Ch1 254nm

| Peak# | Ret. Time | Area     | Height  | Conc.  | Unit | Mark | Name      |
|-------|-----------|----------|---------|--------|------|------|-----------|
| 1     | 31.206    | 43893789 | 993139  | 49.940 | %    |      | RT:31.206 |
| 2     | 45.127    | 43999368 | 729715  | 50.060 | %    |      | RT:45.127 |
| Total |           | 87893157 | 1722854 |        |      |      |           |

### <Chromatogram>

mAU

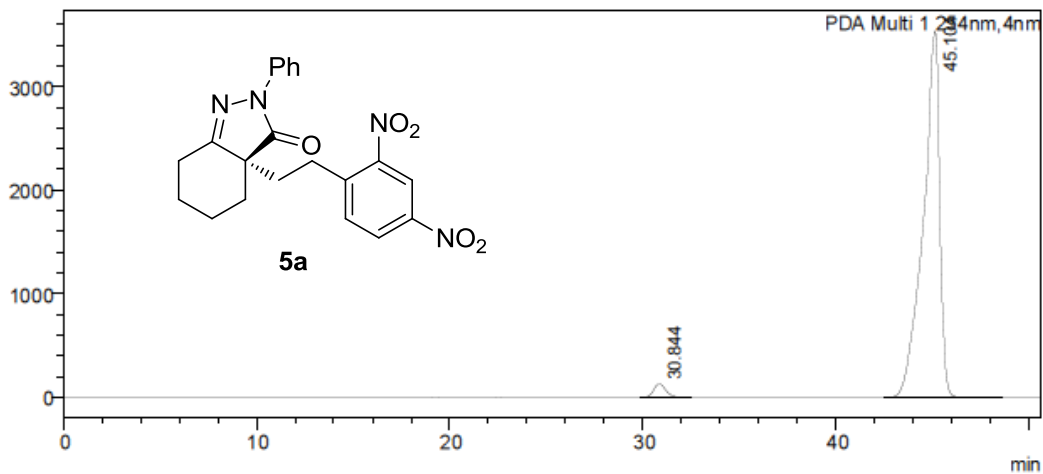

### <Peak Table>

PDA Ch1 254nm

| Peak# | Ret. Time | Area      | Height  | Conc.  | Unit | Mark | Name      |
|-------|-----------|-----------|---------|--------|------|------|-----------|
| 1     | 30.844    | 5577535   | 130175  | 2.629  | %    |      | RT:30.844 |
| 2     | 45.104    | 206614375 | 3536560 | 97.371 | %    |      | RT:45.104 |
| Total |           | 212191909 | 3666735 |        |      |      |           |

<Chromatogram>

mAU

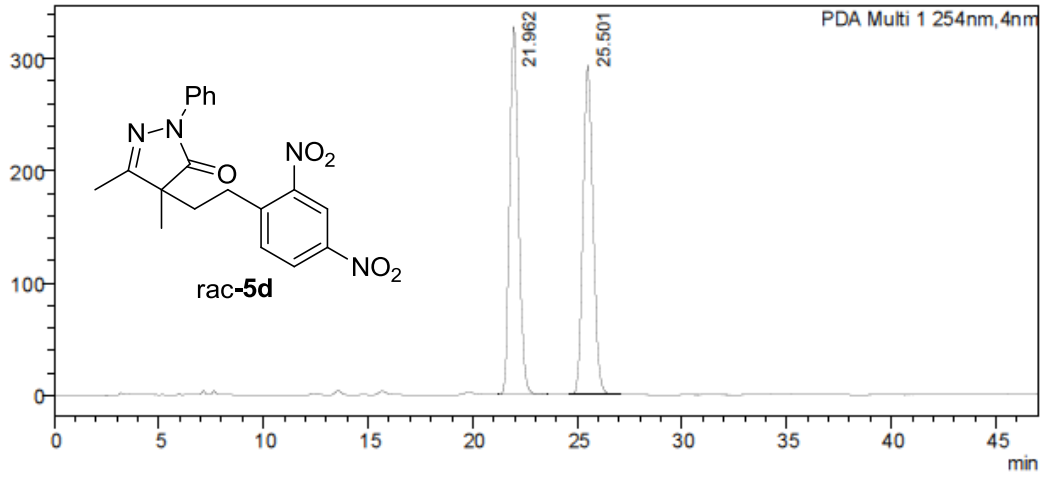

<Peak Table>

PDA Ch1 254nm

| Peak# | Ret. Time | Area     | Height | Conc.  | Unit | Mark | Name      |
|-------|-----------|----------|--------|--------|------|------|-----------|
| 1     | 21.962    | 9720346  | 327929 | 50.172 | %    |      | RT:21.962 |
| 2     | 25.501    | 9653860  | 293423 | 49.828 | %    |      | RT:25.501 |
| Total |           | 19374207 | 621351 |        |      |      |           |

<Chromatogram>

mAU

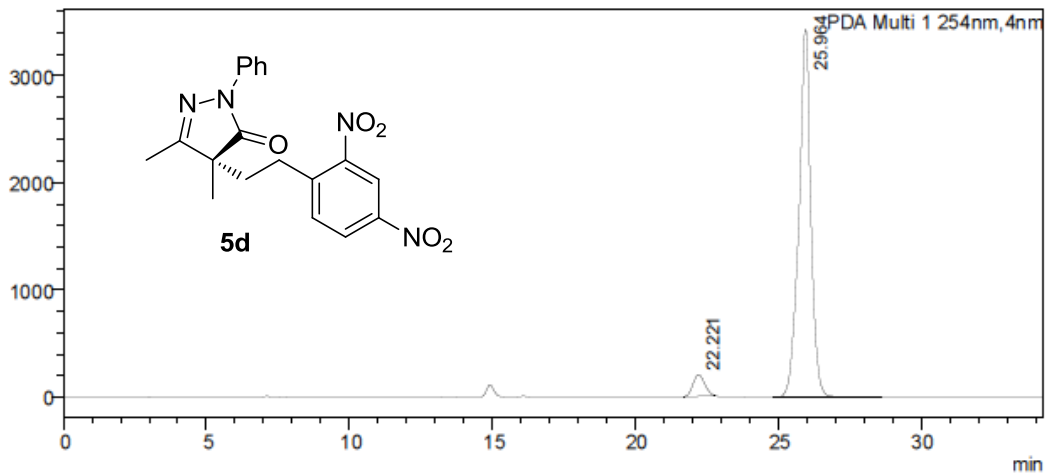

<Peak Table>

PDA Ch1 254nm

| Peak# | Ret. Time | Area      | Height  | Conc.  | Unit | Mark | Name      |
|-------|-----------|-----------|---------|--------|------|------|-----------|
| 1     | 22.221    | 5728296   | 202287  | 5.432  | %    |      | RT:22.221 |
| 2     | 25.964    | 99724805  | 3427340 | 94.568 | %    |      | RT:25.964 |
| Total |           | 105453101 | 3629627 |        |      |      |           |
